# Supplementary material for: Synthesis andin vitroevaluation of naphthalimide–benzimidazole conjugates as potential antitumor agents
Source: Royal Society of Chemistry journal article supplement (doi:10.1039/c8ob02973c), 2019-01-01
Supplement: c8ob02973c1.pdf [file c8ob02973c1.pdf]

## Supporting Information

### Synthesis and *in vitro* evaluation of naphthalimide-benzimidazole conjugates as potential antitumor agents

Iqbal Singh, Vijay luxami and Kamaldeep Paul\*

*School of Chemistry and Biochemistry, Thapar Institute of Engineering & Technology,  
Patiala- 147 004, India*

*E-mail: [kpaul@thapar.edu](mailto:kpaul@thapar.edu)*

#### Table of Contents

|                       | Contents                                                                                   | Page No |
|-----------------------|--------------------------------------------------------------------------------------------|---------|
| <b>Figure S1-S71</b>  | <sup>1</sup> H NMR, <sup>13</sup> C NMR and Mass spectra of compounds                      | S2-S37  |
| <b>Table S1-S2</b>    | Anticancer activity of compounds at single dose concentration                              | S37-S41 |
| <b>Table S3</b>       | Overview of the preliminary anticancer assay                                               | S41     |
| <b>Figure S72-S73</b> | <i>In vitro</i> anticancer activity at five dose concentration                             | S42-S43 |
| <b>Figure S74</b>     | Benesi-Hildebrand plot of compounds with DNA                                               | S44     |
| <b>Figure S75</b>     | Thermal denaturation plots of ct-DNA                                                       | S44     |
| <b>Figure S76</b>     | Emission spectra of compound <b>15</b> at different temperatures in the presence of ct-DNA | S45     |
| <b>Figure S77</b>     | Emission spectra of compound <b>23</b> at different temperatures in the presence of ct-DNA | S45     |
| <b>Figure S78</b>     | Stern-Volmer plot of compounds at various temperatures                                     | S46     |
| <b>Figure S79</b>     | Modified Stern-Volmer plot of at various temperatures                                      | S46     |
| <b>Figure S80</b>     | Von't Hoff plot of compounds at different temperatures                                     | S47     |
| <b>Figure S81</b>     | Emission spectra of EB- DNA complex in the presence of the compounds                       | S47     |
| <b>Figure S82</b>     | CD and UV-vis spectra of ct-DNA with and without compounds                                 | S47-S48 |
| <b>Figure S83</b>     | Benesi-Hildebrand plot for interaction of compounds with BSA                               | S48     |
| <b>Figure S84</b>     | Stern-Volmer plot and modified Stern-Volmer plot of compounds with BSA                     | S48     |

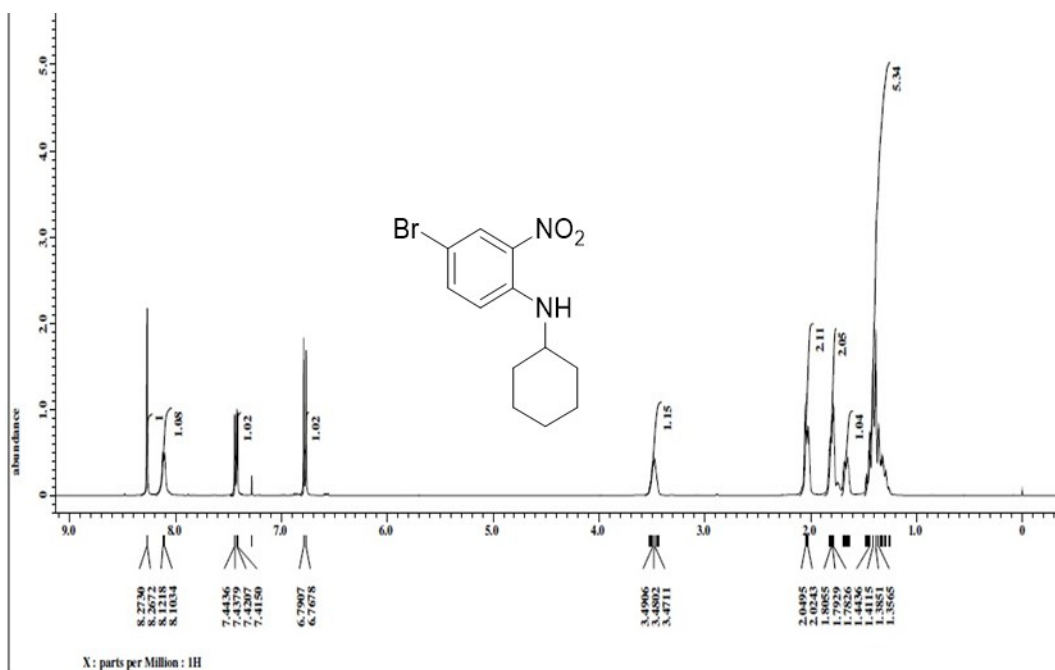

Figure S1: <sup>1</sup>H NMR spectrum of 4-bromo-N-cyclohexyl-2-nitroaniline (3a).

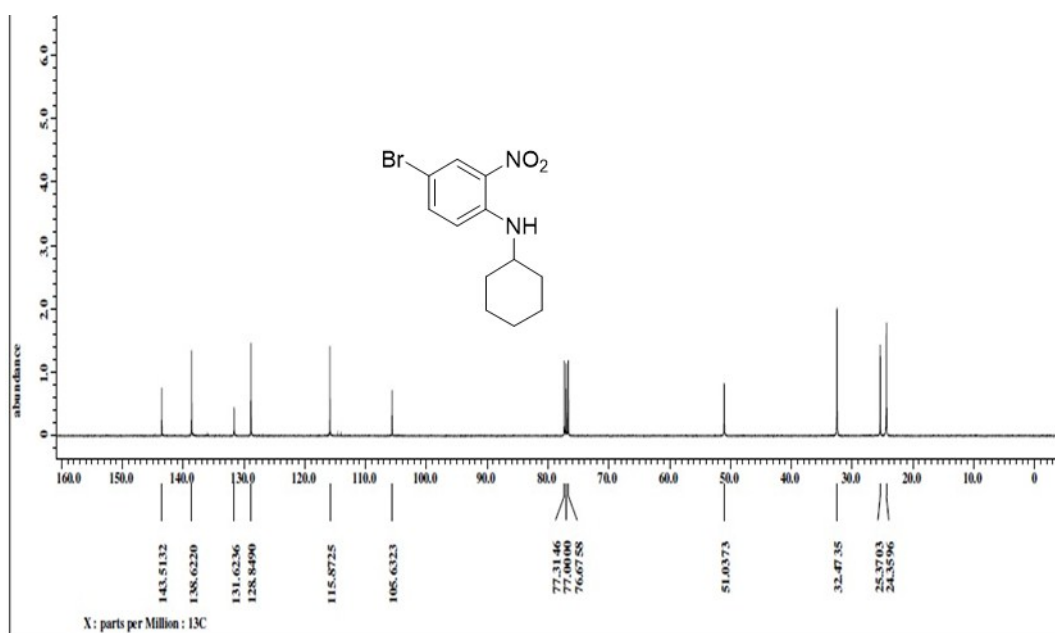

Figure S2: <sup>13</sup>C NMR spectrum of 4-bromo-N-cyclohexyl-2-nitroaniline (3a).

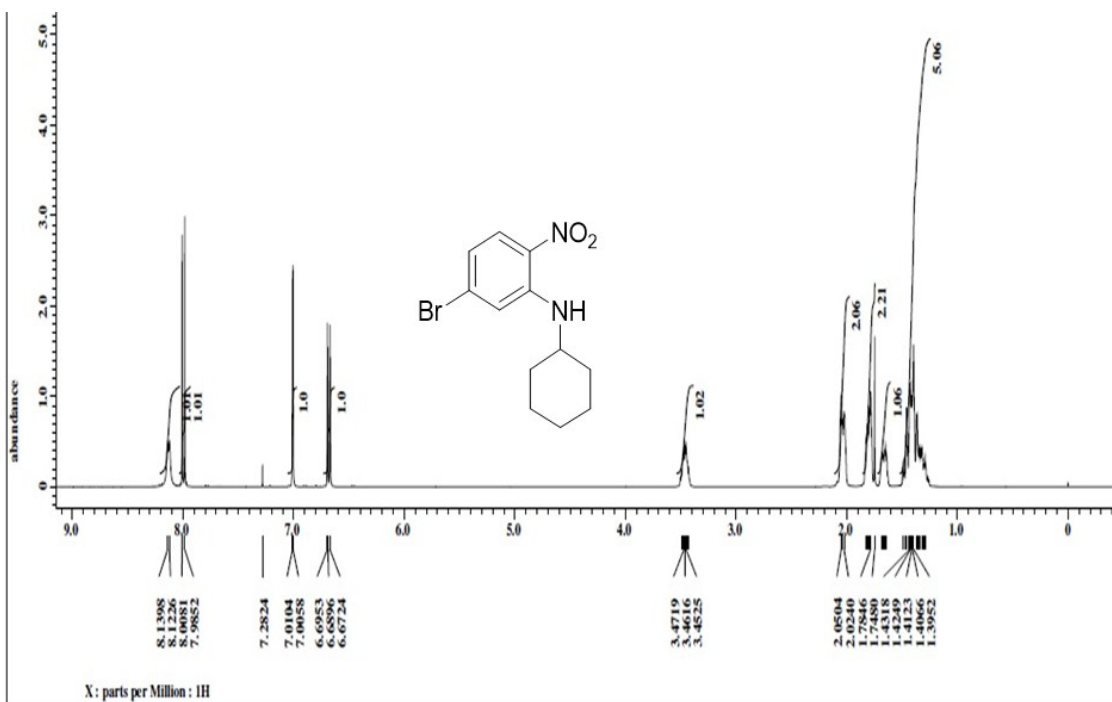

Figure S3: <sup>1</sup>H NMR spectrum of 5-bromo-N-cyclohexyl-2-nitroaniline (3b).

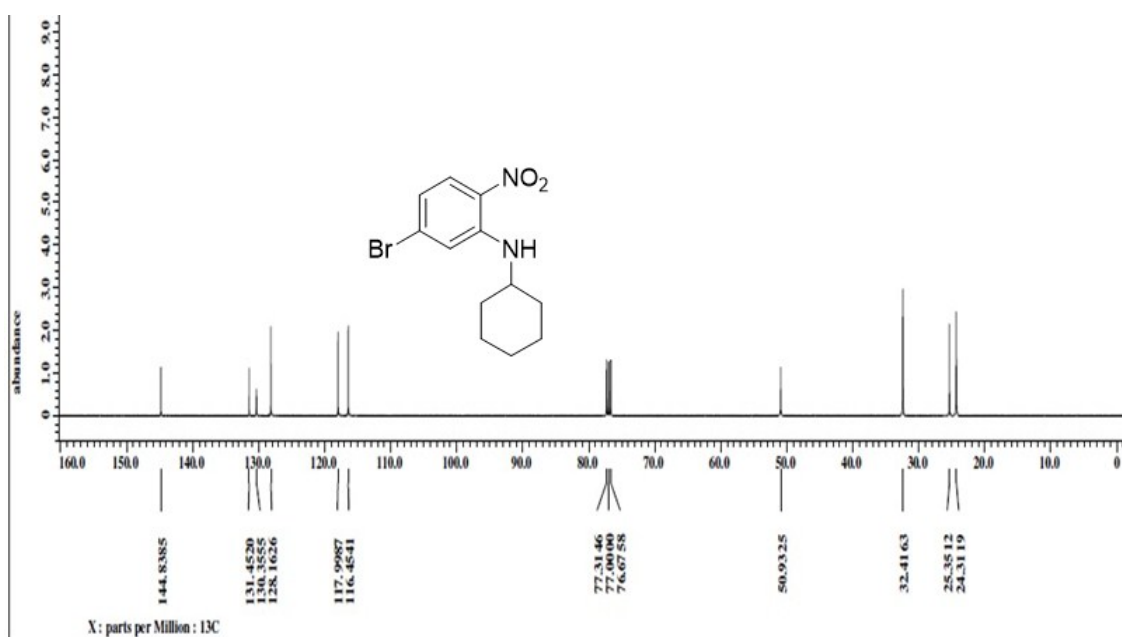

Figure S4: <sup>13</sup>C NMR spectrum of 5-bromo-N-cyclohexyl-2-nitroaniline (3b).

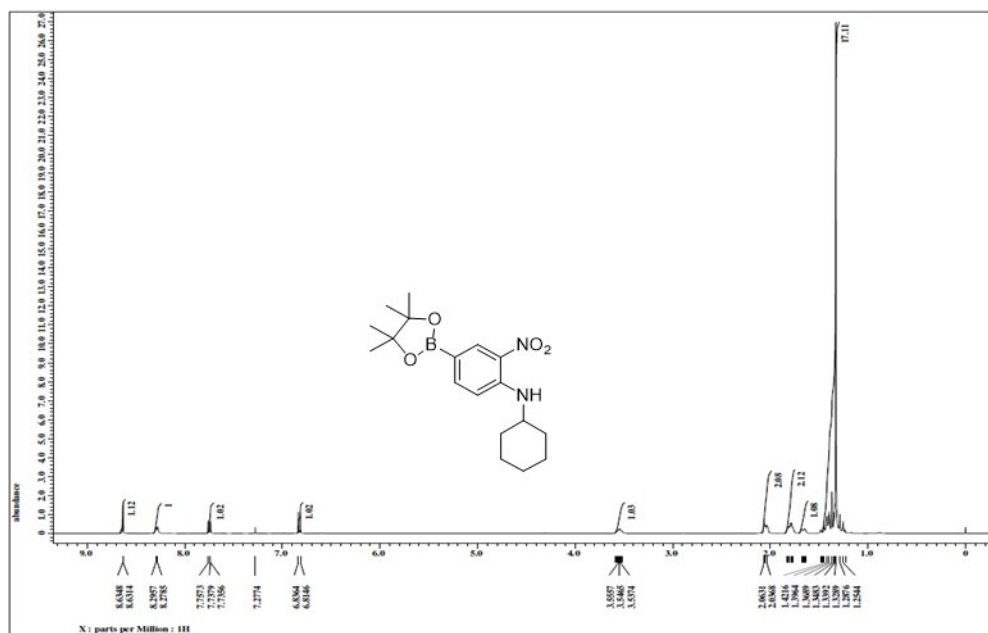

**Figure S5:**  $^1\text{H}$  NMR spectrum of *N*-cyclohexyl-2-nitro-4-(4,4,5,5-tetramethyl-1,3,2-dioxaborolan-2-yl)aniline (**4a**).

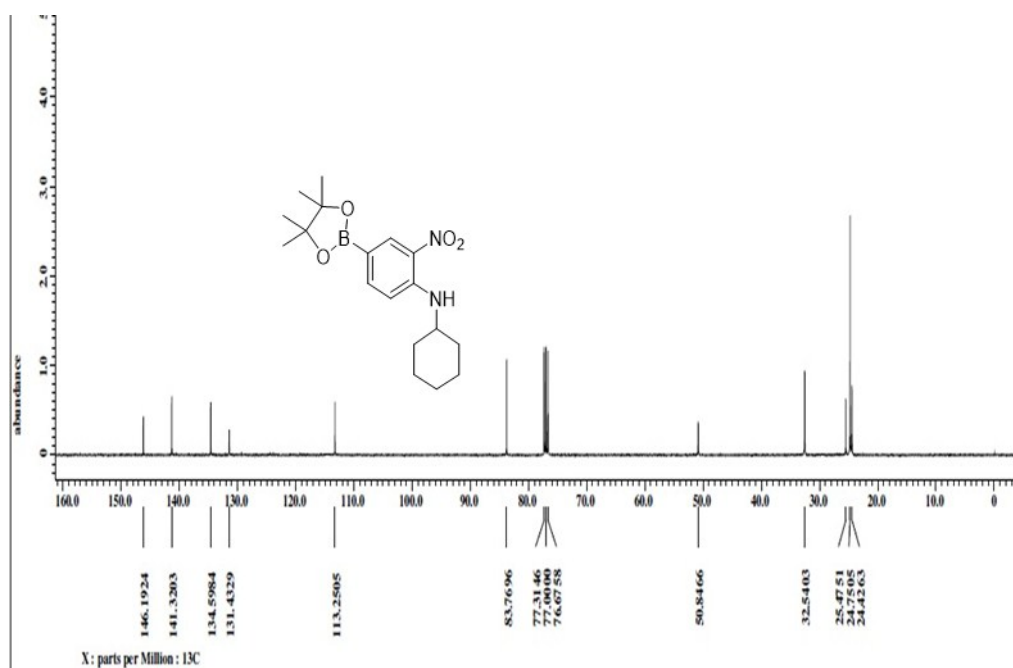

**Figure S6:**  $^{13}\text{C}$  NMR spectrum of *N*-cyclohexyl-2-nitro-4-(4,4,5,5-tetramethyl-1,3,2-dioxaborolan-2-yl)aniline (**4a**).

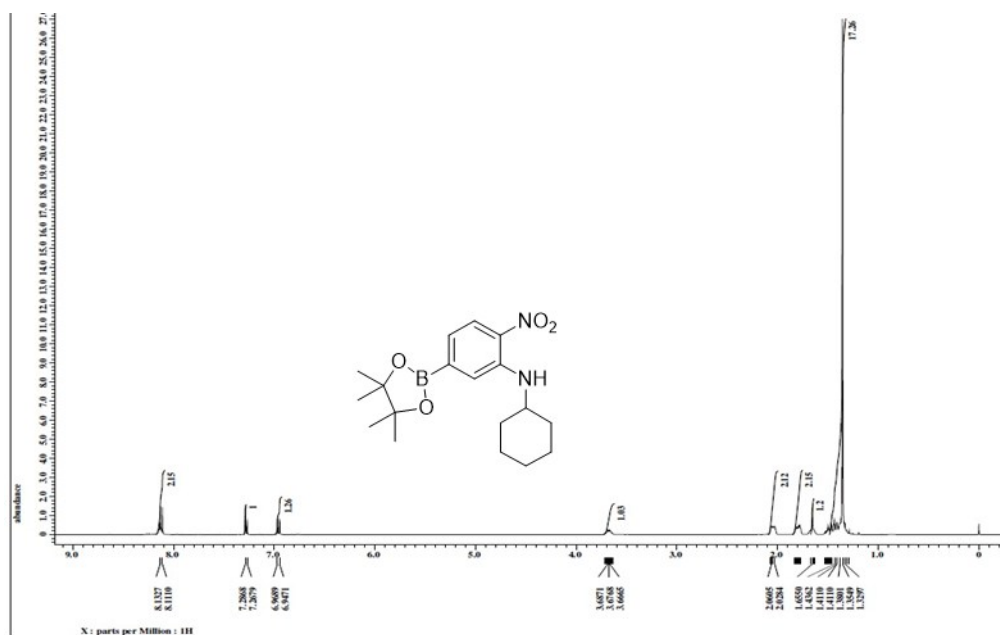

**Figure S7:** <sup>1</sup>H NMR spectrum of *N*-cyclohexyl-2-nitro-5-(4,4,5,5-tetramethyl-1,3,2-dioxaborolan-2-yl)aniline (**4b**).

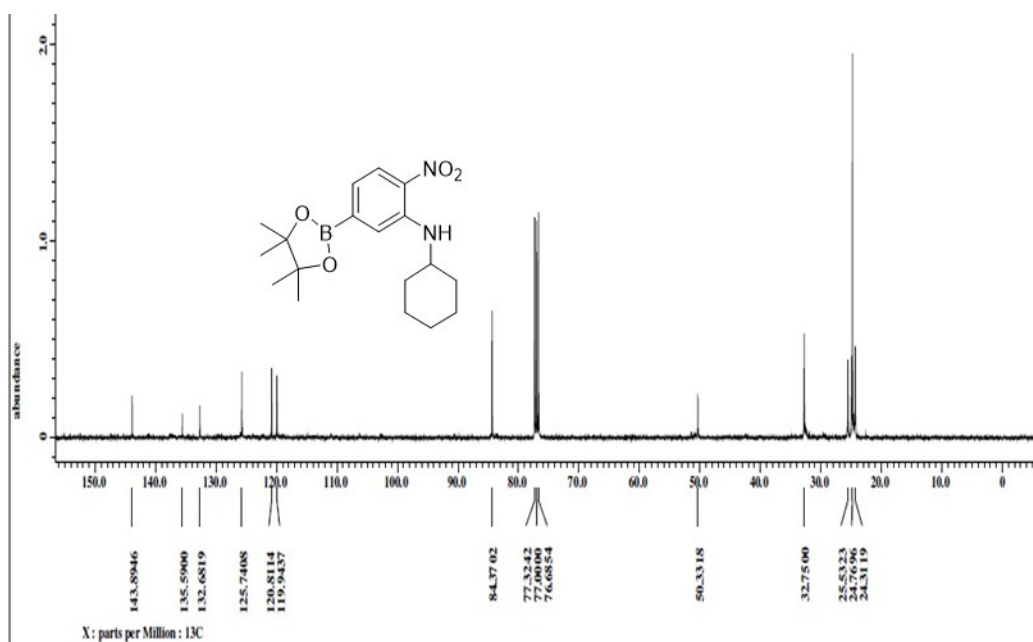

**Figure S8:** <sup>13</sup>C NMR spectrum of *N*-cyclohexyl-2-nitro-5-(4,4,5,5-tetramethyl-1,3,2-dioxaborolan-2-yl)aniline (**4b**).

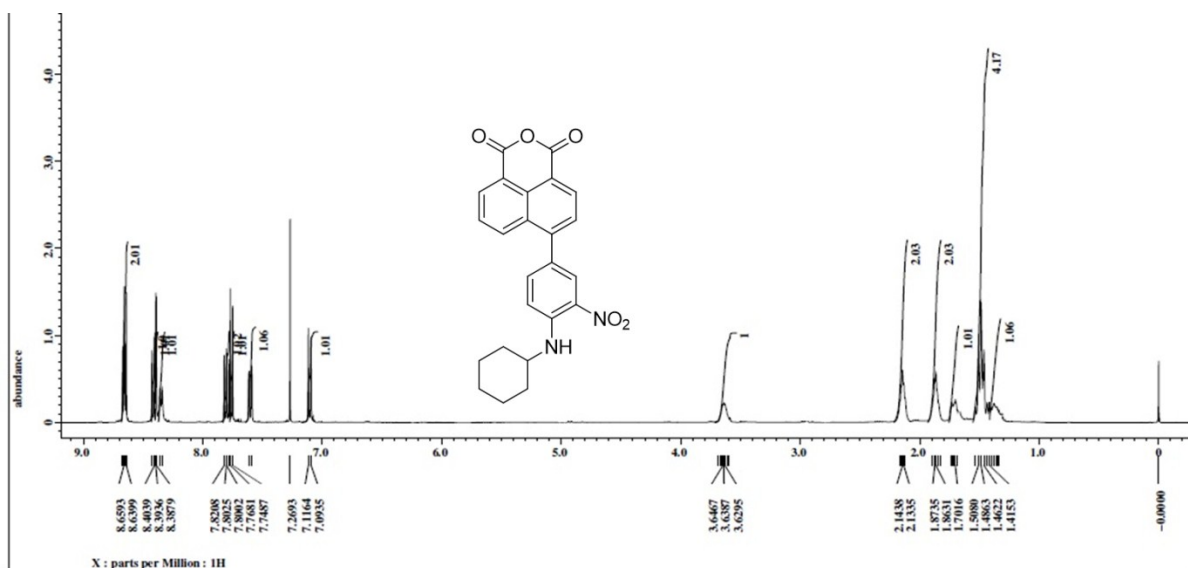

**Figure S9:** <sup>1</sup>H NMR spectrum of *N*-cyclohexyl-2-nitro-5-(4,4,5,5-tetramethyl-1,3,2-dioxaborolan-2-yl)aniline (**6a**).

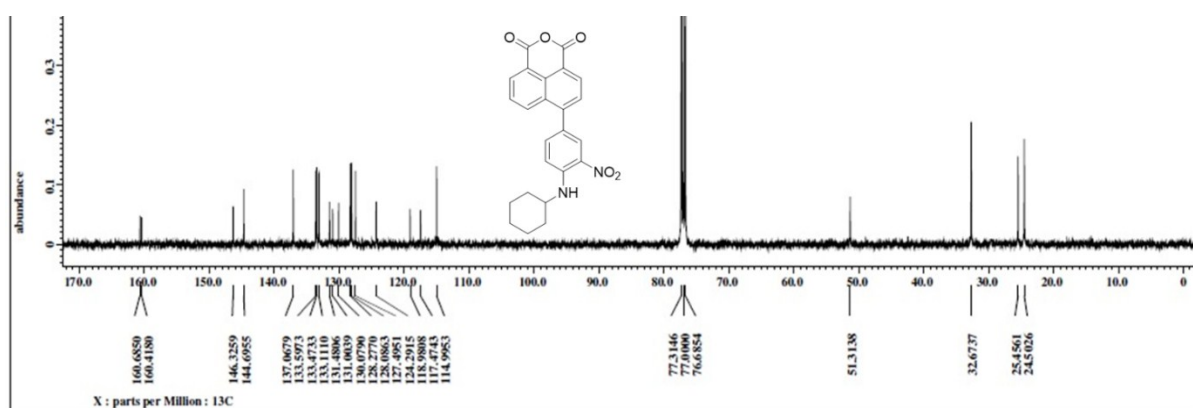

**Figure S10:** <sup>13</sup>C NMR spectrum of *N*-cyclohexyl-2-nitro-5-(4,4,5,5-tetramethyl-1,3,2-dioxaborolan-2-yl)aniline (**6a**).

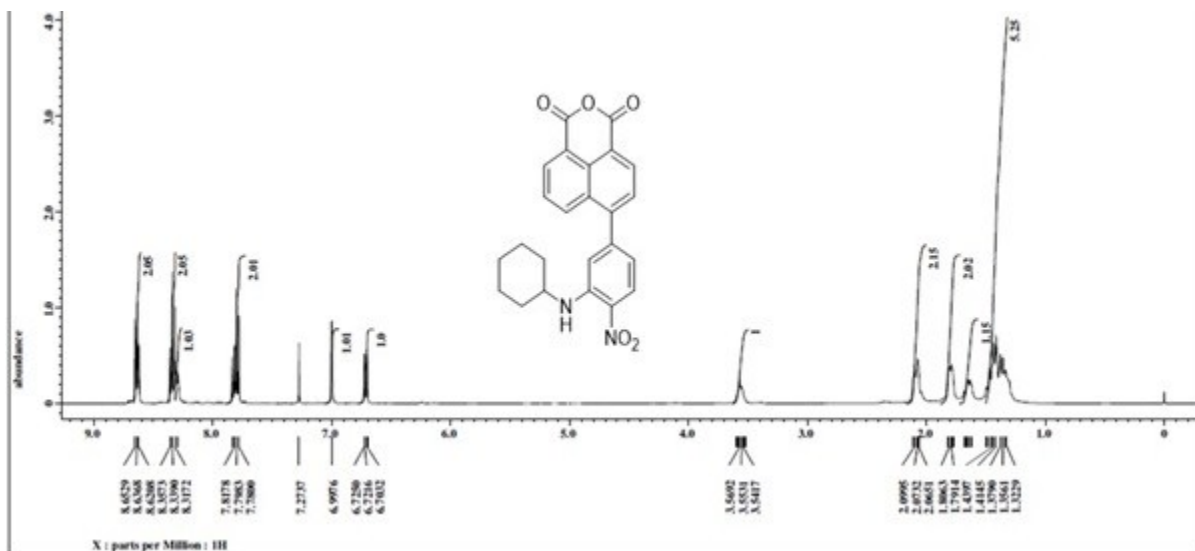

**Figure S11:** <sup>1</sup>H NMR spectrum of *N*-cyclohexyl-2-nitro-5-(4,4,5,5-tetramethyl-1,3,2-dioxaborolan-2-yl)aniline (**6b**).

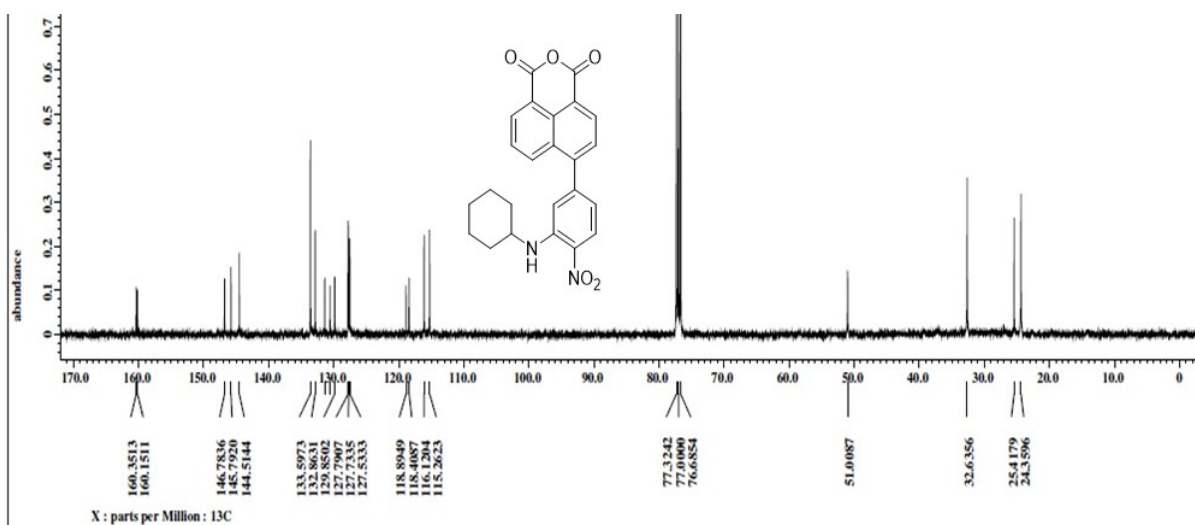

**Figure S12:** <sup>13</sup>C NMR spectrum of *N*-cyclohexyl-2-nitro-5-(4,4,5,5-tetramethyl-1,3,2-dioxaborolan-2-yl)aniline (**6b**).

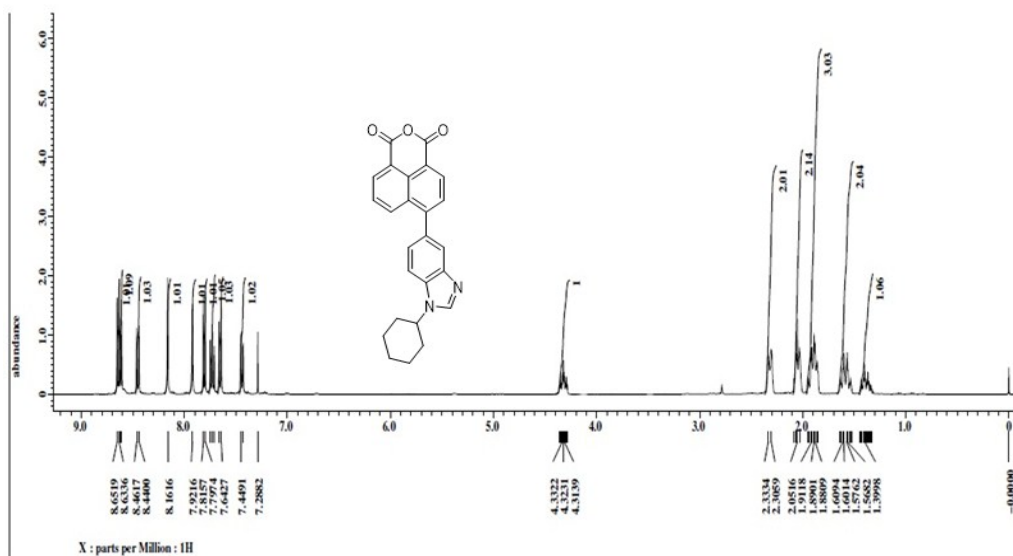

**Figure S13:** <sup>1</sup>H NMR spectrum of spectral data of 6-(1-cyclohexyl-1H-benzo[*d*]imidazol-5-yl)-1H,3H-benzo[*de*]isochromene-1,3-dione (**9a**).

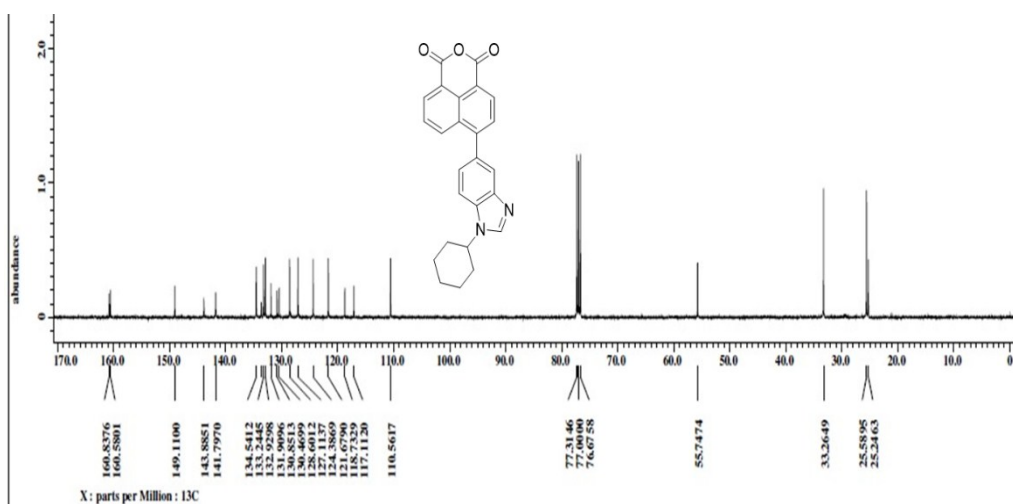

**Figure S14:** <sup>13</sup>C NMR spectrum of 6-(1-cyclohexyl-1H-benzo[*d*]imidazol-5-yl)-1H,3H-benzo[*de*]isochromene-1,3-dione (**9a**).



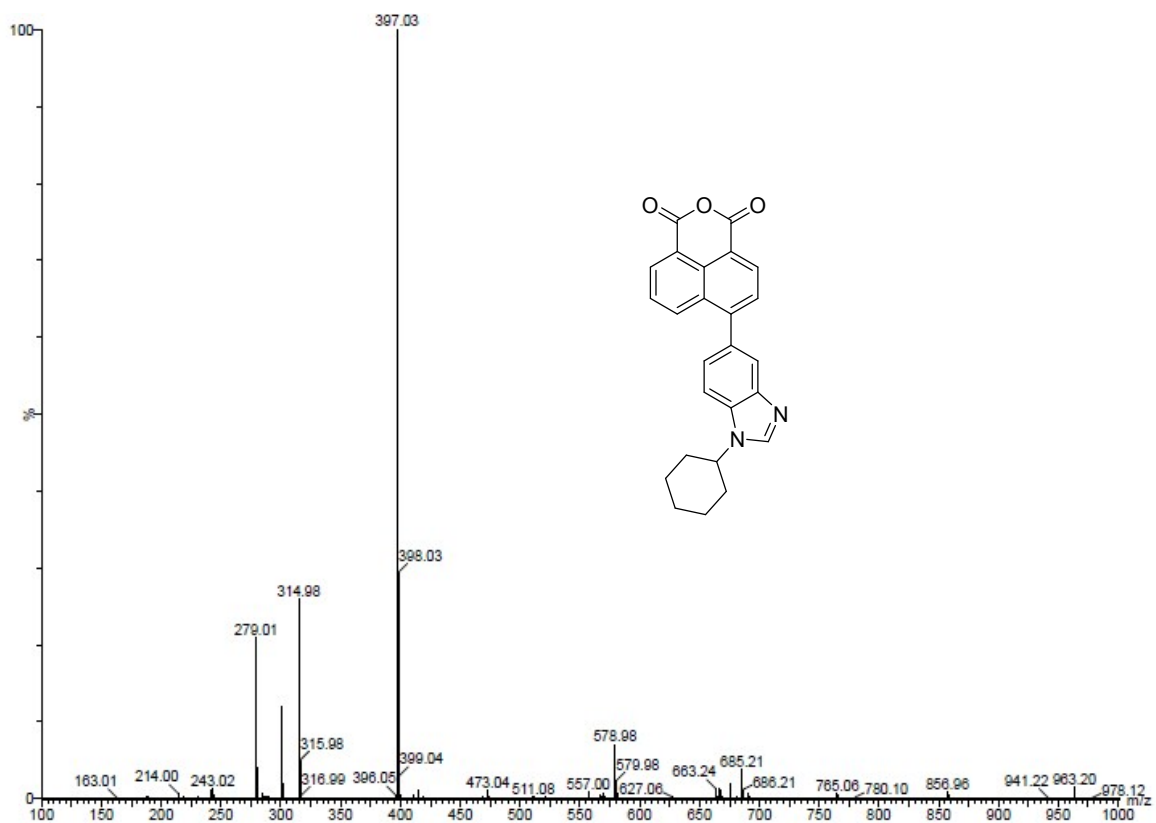

**Figure S15:** Mass spectrum of 6-(1-cyclohexyl-1H-benzo[*d*]imidazol-5-yl)-1H,3H-benzo[*de*]isochromene-1,3-dione (**9a**).

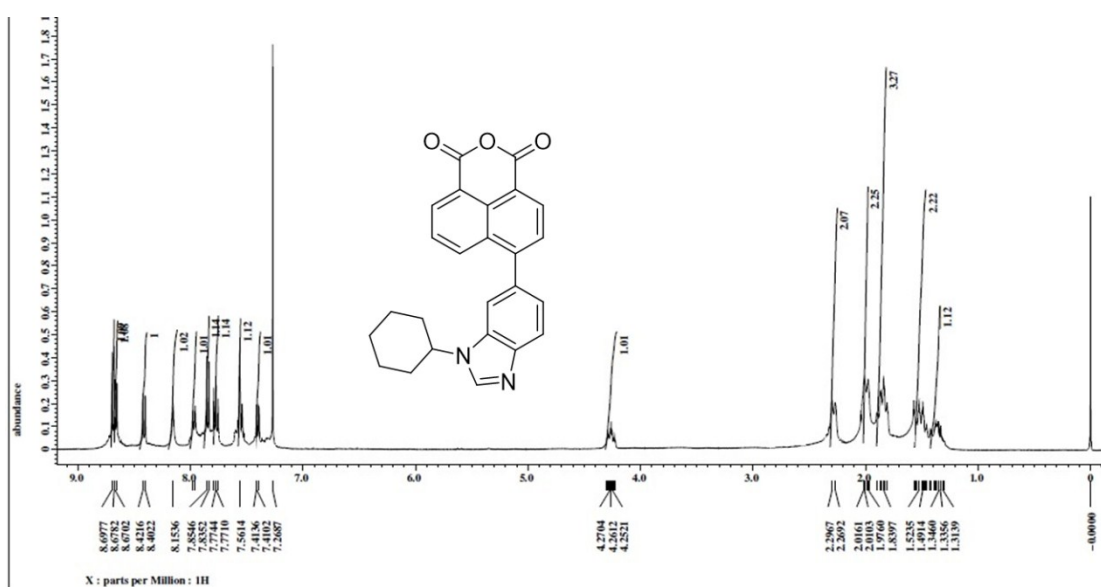

**Figure S16:** <sup>1</sup>H NMR spectrum of 6-(1-cyclohexyl-1H-benzo[*d*]imidazol-6-yl)-1H,3H-benzo[*de*]isochromene-1,3-dione (**9b**).

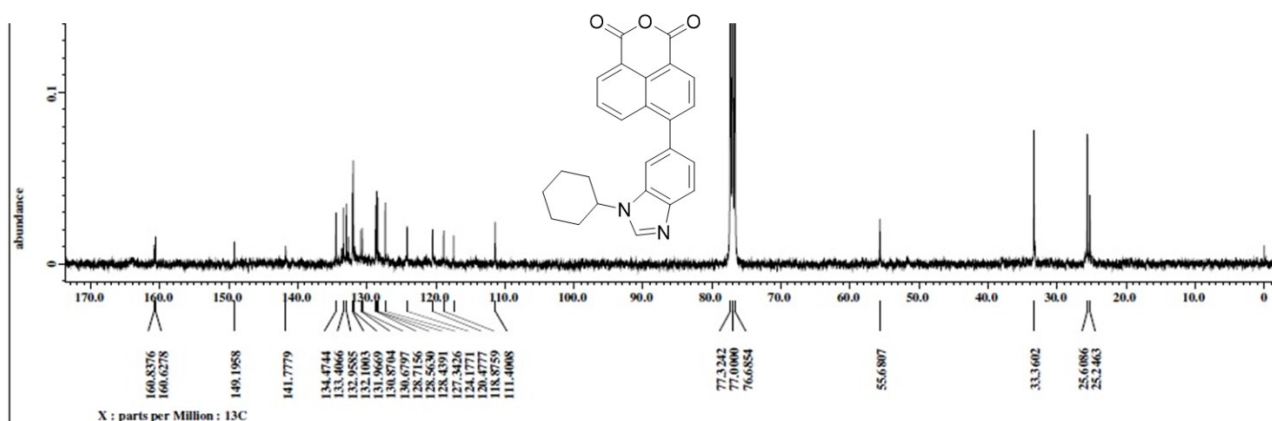

**Figure S17:**  $^{13}\text{C}$  NMR spectrum of 6-(1-cyclohexyl-1*H*-benzo[*d*]imidazol-6-yl)-1*H*,3*H*-benzo[*de*]isochromene-1,3-dione (**9b**).

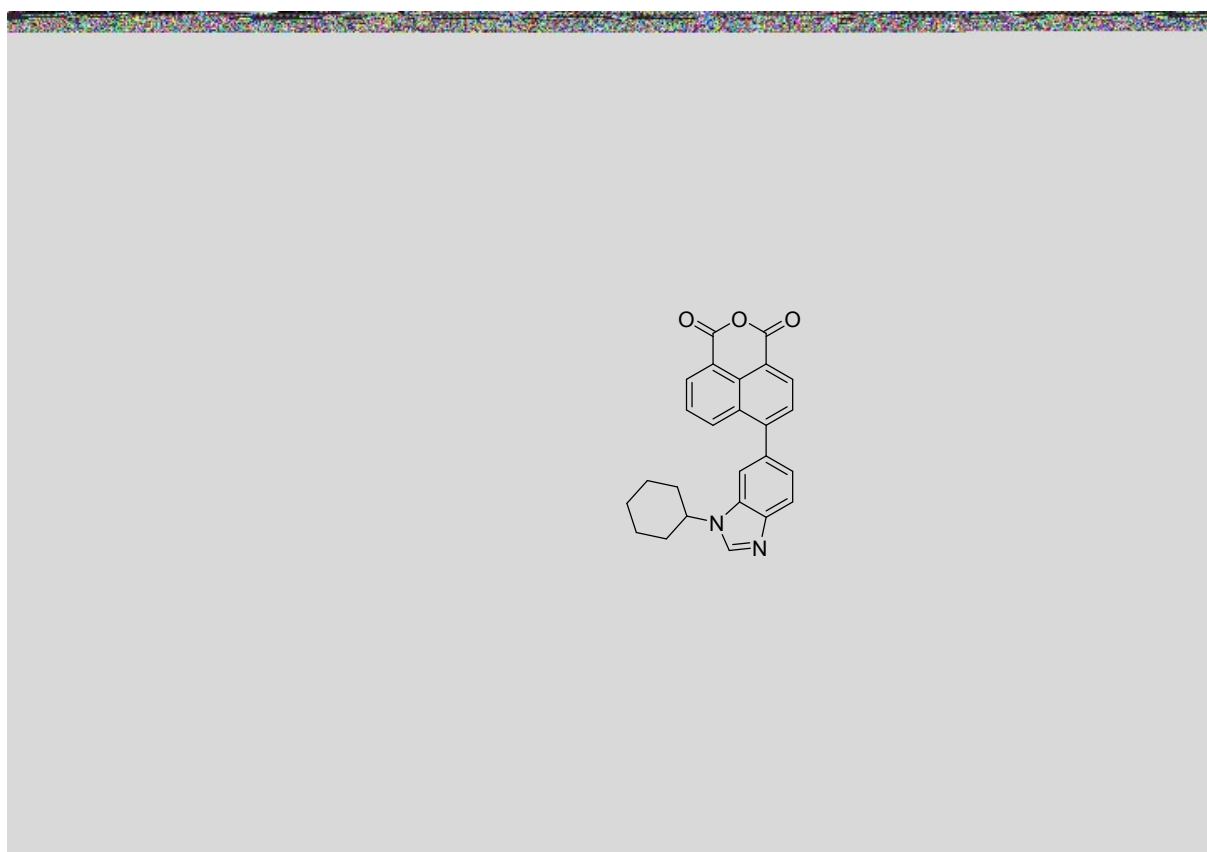

**Figure S18:** Mass spectrum of 6-(1-cyclohexyl-1*H*-benzo[*d*]imidazol-6-yl)-1*H*,3*H*-benzo[*de*]isochromene-1,3-dione (**9b**).

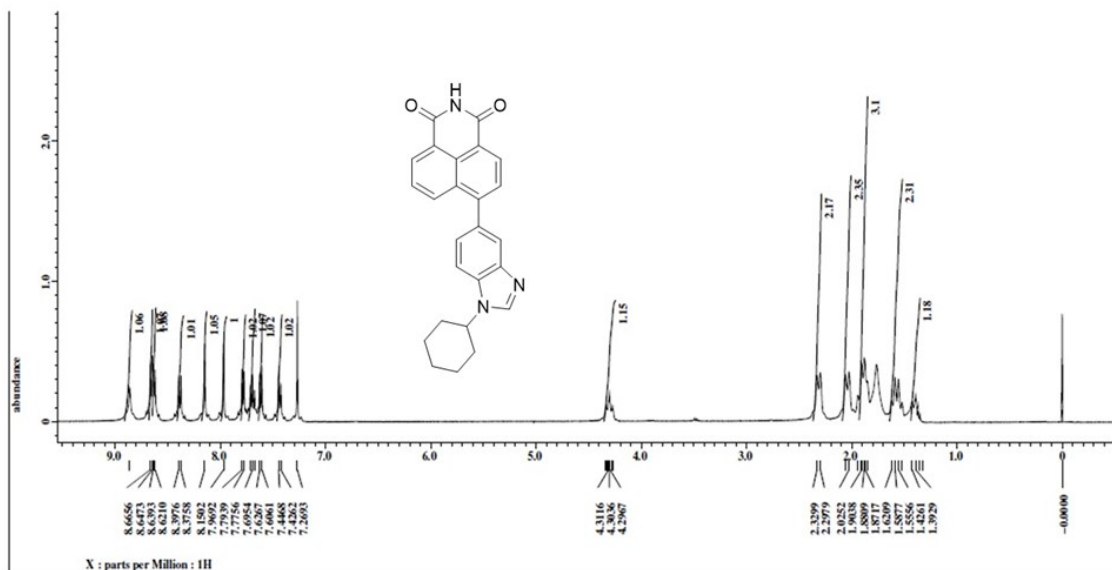

**Figure S19:** <sup>1</sup>H NMR spectrum of 6-(1-cyclohexyl-1H-benzo[*d*]imidazol-5-yl)-1H-benzo[*de*]isoquinoline-1,3(2H)-dione (**10a**).

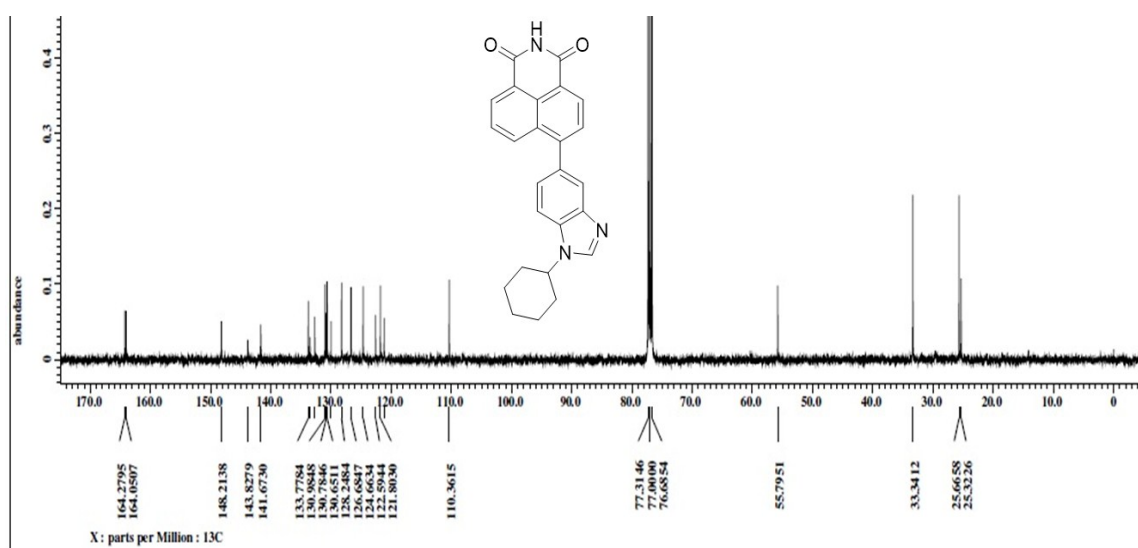

**Figure S20:** <sup>13</sup>C NMR spectrum of 6-(1-cyclohexyl-1H-benzo[*d*]imidazol-5-yl)-1H-benzo[*de*]isoquinoline-1,3(2H)-dione (**10a**).

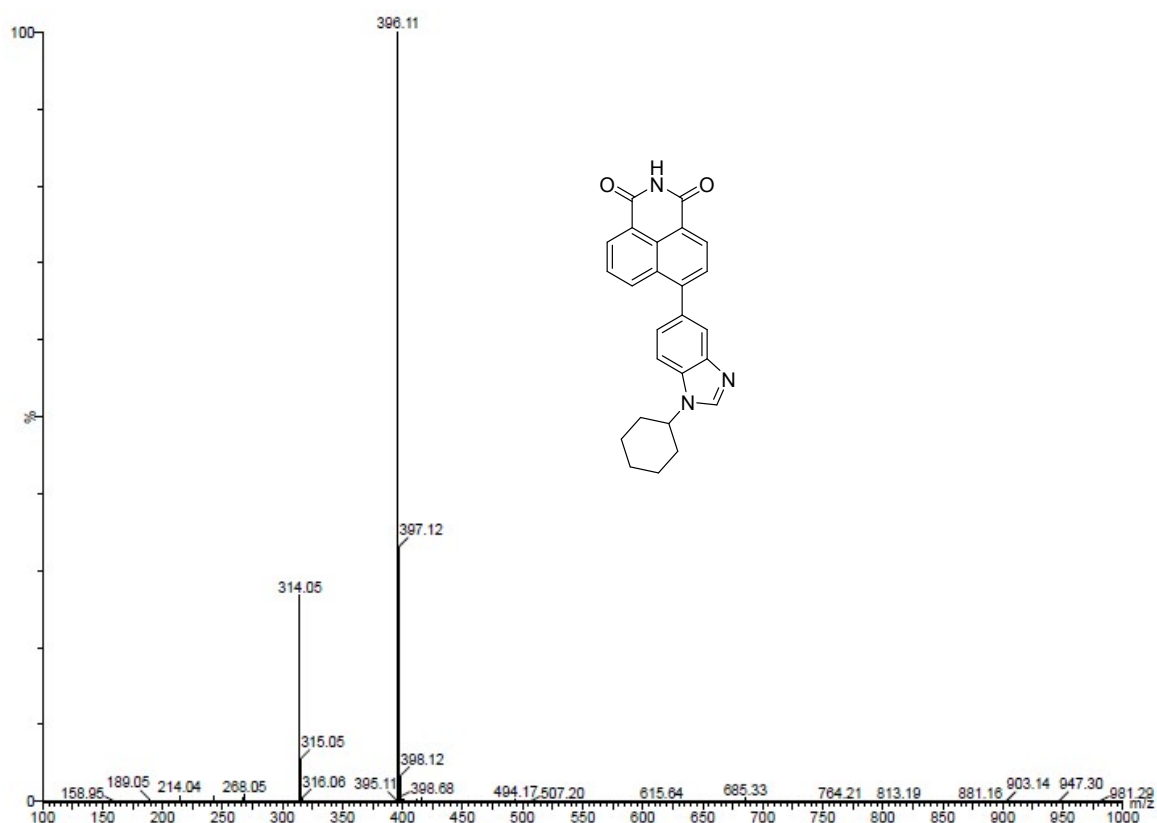

**Figure S21:** Mass spectrum of 6-(1-cyclohexyl-1H-benzo[d]imidazol-5-yl)-1H-benzo[de]isoquinoline-1,3(2H)-dione (10a).

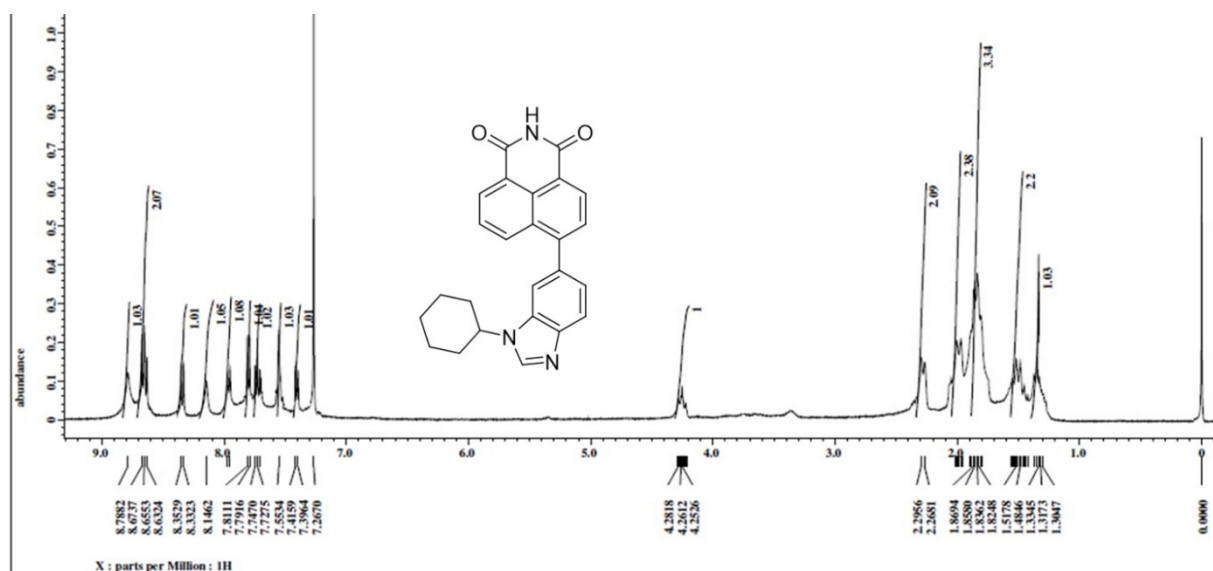

**Figure S22:** <sup>1</sup>H NMR spectrum of 6-(1-cyclohexyl-1H-benzo[d]imidazol-6-yl)-1H-benzo[de]isoquinoline-1,3(2H)-dione (10b).

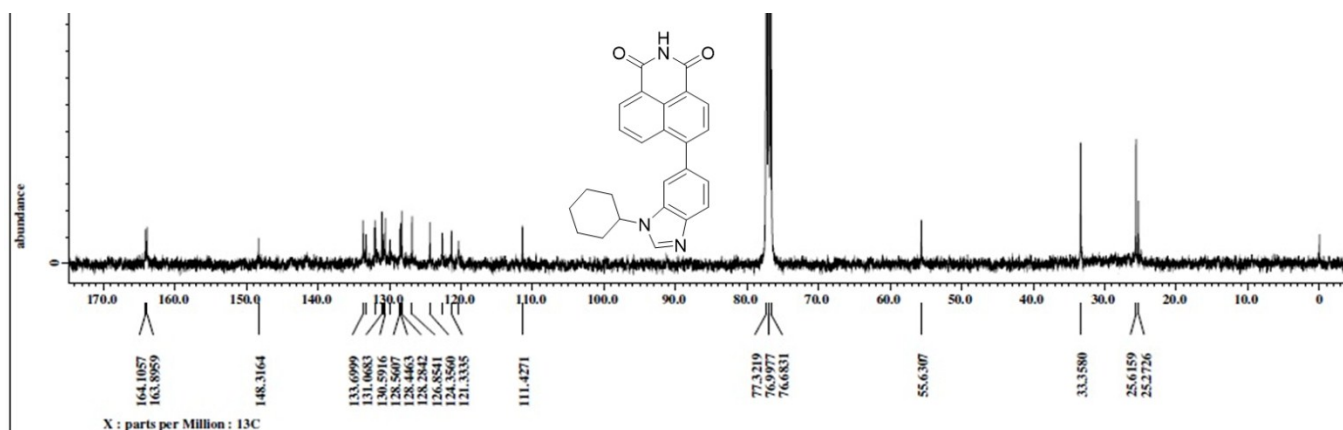

**Figure S23:**  $^{13}\text{C}$  NMR spectrum of 6-(1-cyclohexyl-1H-benzo[*d*]imidazol-6-yl)-1H-benzo[*de*]isoquinoline-1,3(2H)-dione (**10b**).

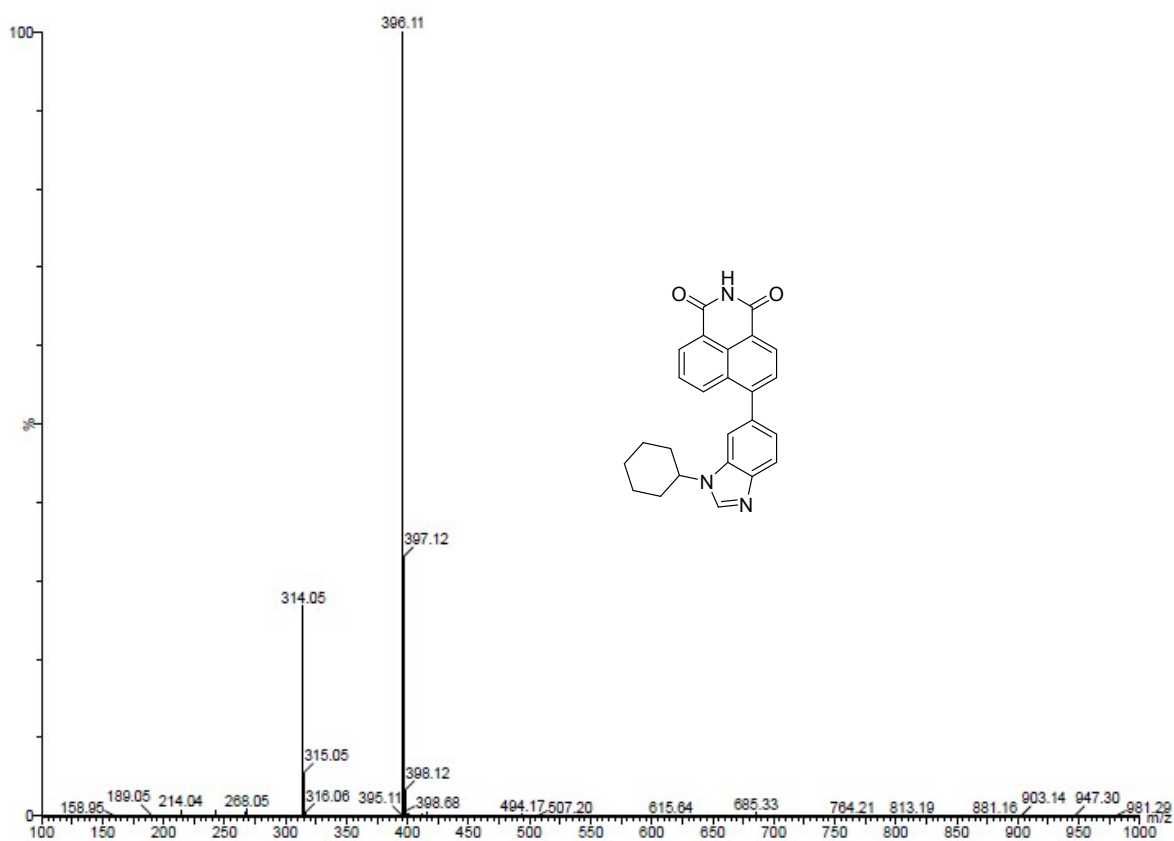

**Figure S24:** Mass spectrum of 6-(1-cyclohexyl-1H-benzo[*d*]imidazol-6-yl)-1H-benzo[*de*]isoquinoline-1,3(2H)-dione (**10b**).

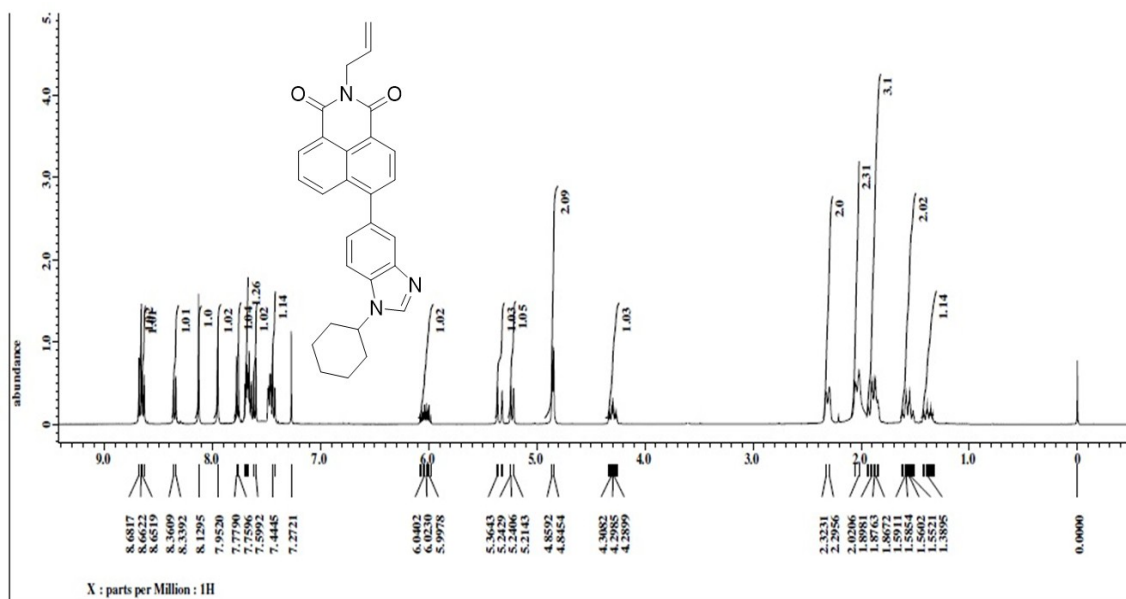

**Figure S25:** <sup>1</sup>H NMR spectrum of 2-allyl-6-(1-cyclohexyl-1H-benzo[d]imidazol-5-yl)-1H-benzo[de]isoquinoline-1,3(2H)-dione (**11**).

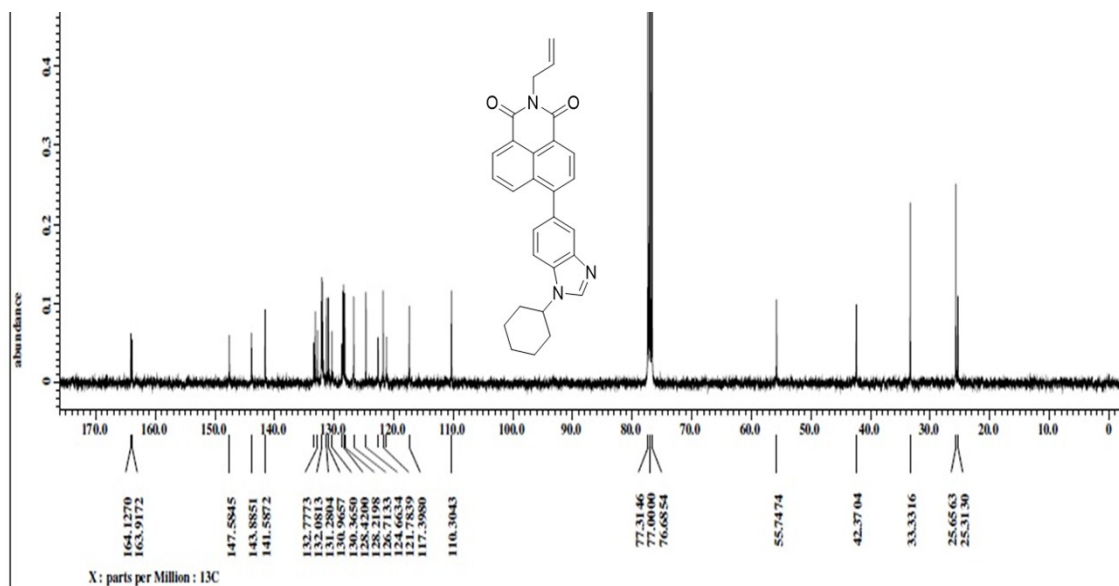

**Figure S26:** <sup>13</sup>C NMR spectrum of 2-allyl-6-(1-cyclohexyl-1H-benzo[d]imidazol-5-yl)-1H-benzo[de]isoquinoline-1,3(2H)-dione (**11**).

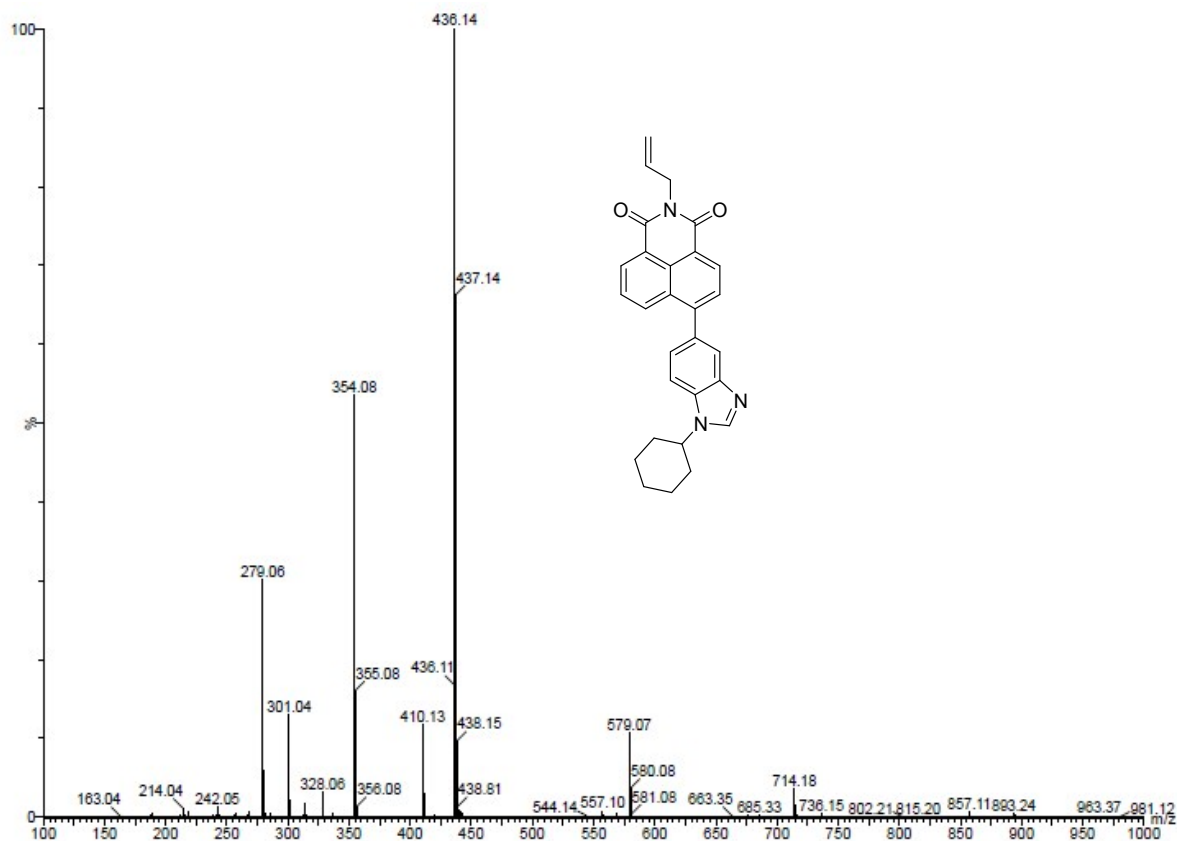

**Figure S27:** Mass spectrum of 2-allyl-6-(1-cyclohexyl-1H-benzo[*d*]imidazol-5-yl)-1H-benzo[*de*]isoquinoline-1,3(2H)-dione (**11**).

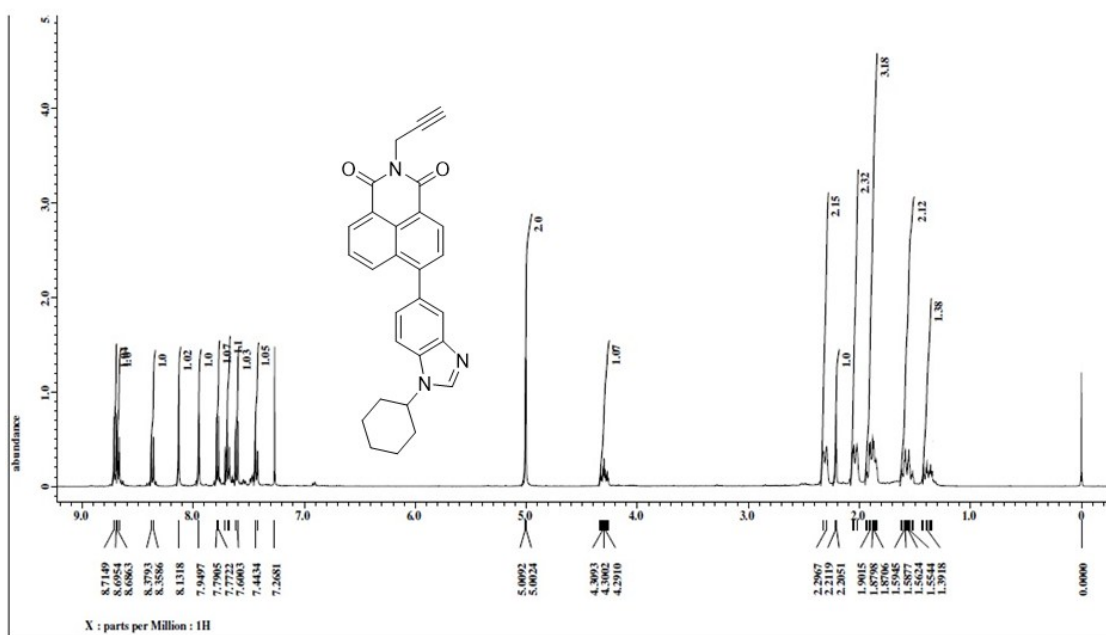

**Figure S28:**  $^1\text{H}$  NMR spectrum of 6-(1-cyclohexyl-1H-benzo[*d*]imidazol-5-yl)-2-(prop-2-yn-1-yl)-1H-benzo[*de*]isoquinoline-1,3(2H)-dione (**12**).

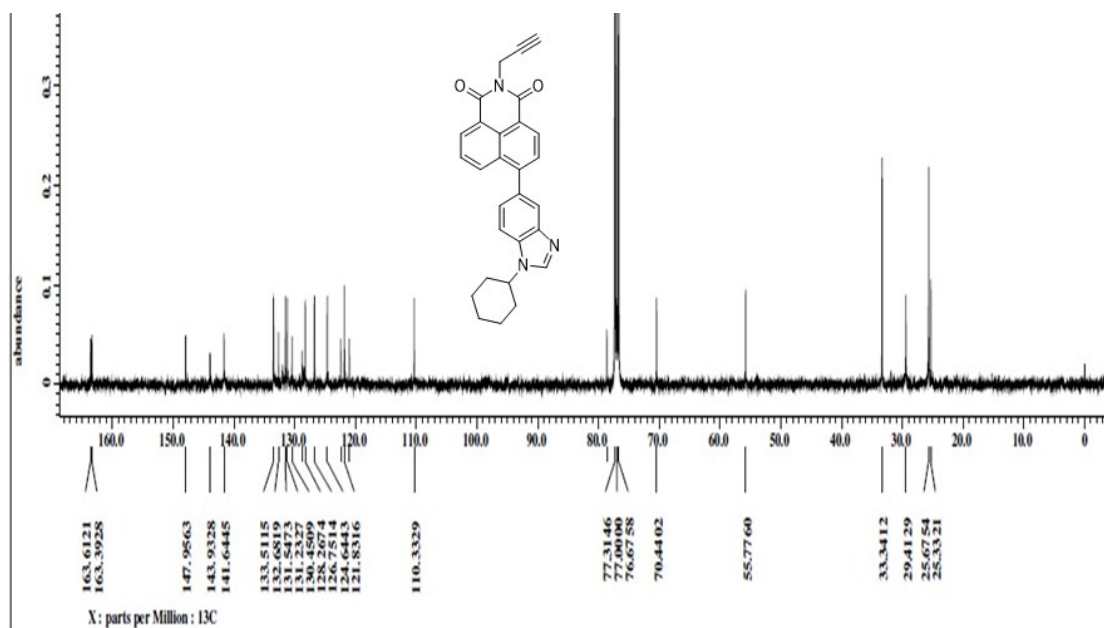

**Figure S29:**  $^{13}\text{C}$  NMR spectrum of 6-(1-cyclohexyl-1*H*-benzo[*d*]imidazol-5-yl)-2-(prop-2-yn-1-yl)-1*H*-benzo[*de*]isoquinoline-1,3(2*H*)-dione (**12**).

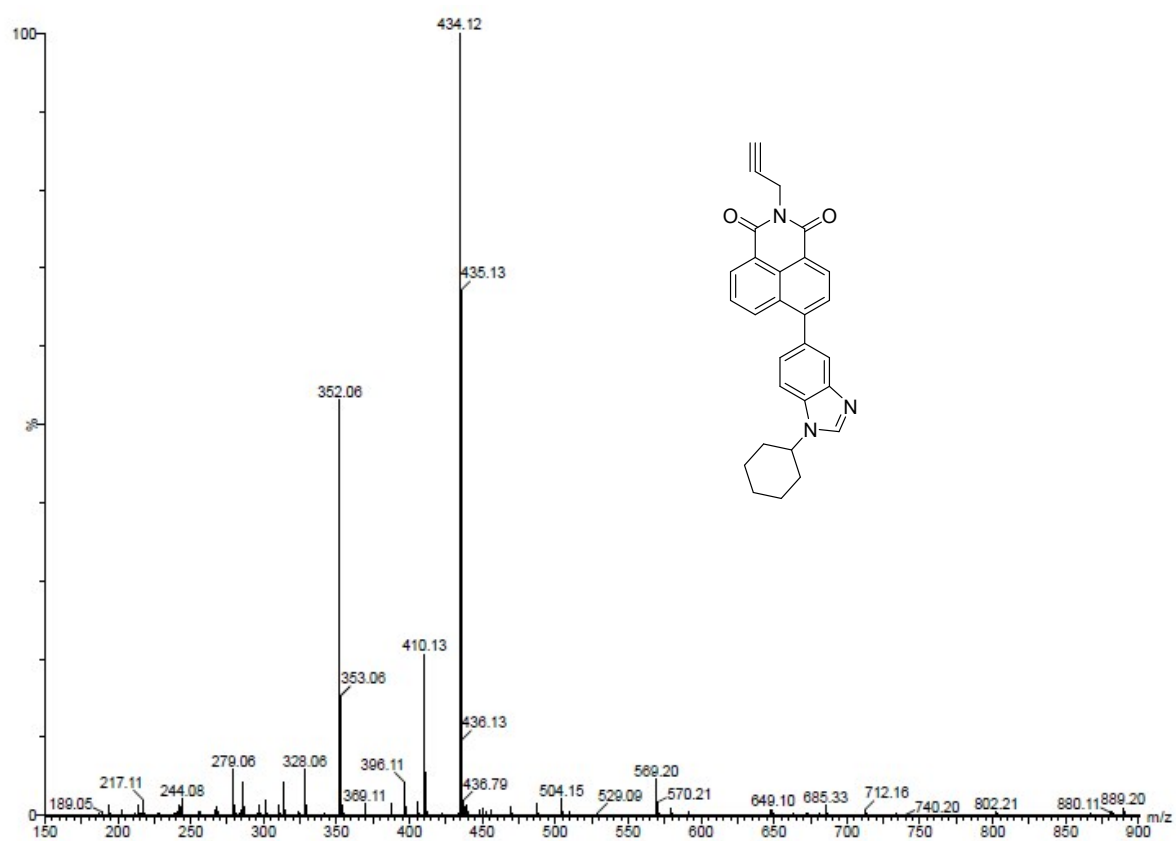

**Figure S30:** Mass spectrum of 6-(1-cyclohexyl-1*H*-benzo[*d*]imidazol-5-yl)-2-(prop-2-yn-1-yl)-1*H*-benzo[*de*]isoquinoline-1,3(2*H*)-dione (**12**).



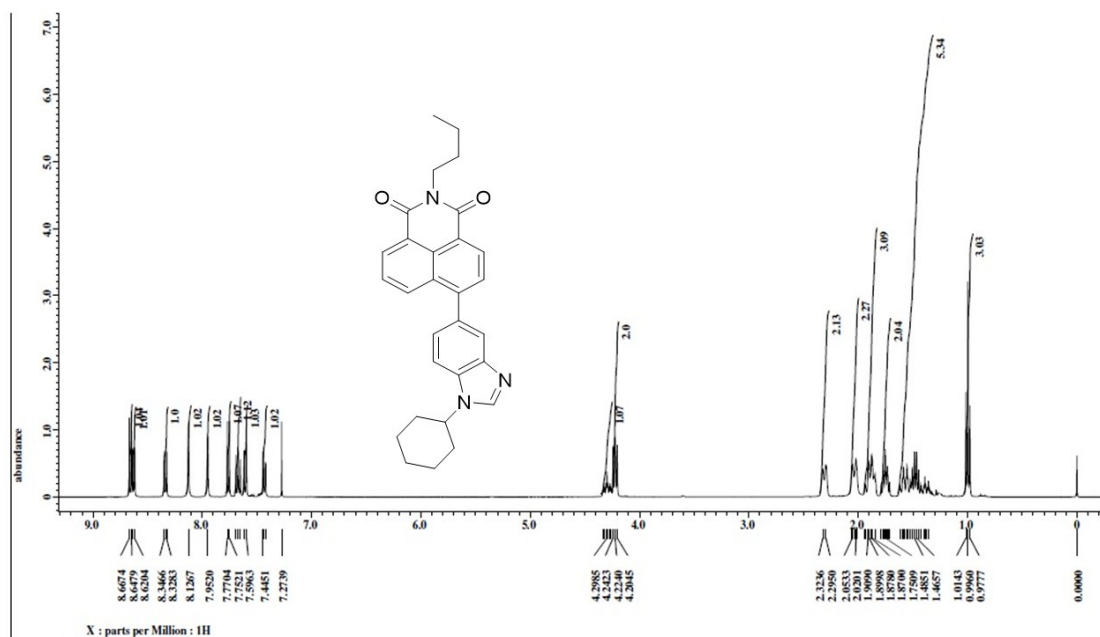

**Figure S31:** <sup>1</sup>H NMR spectrum of 2-butyl-6-(1-cyclohexyl-1H-benzo[d]imidazol-5-yl)-1H-benzo[de]isoquinoline-1,3(2H)-dione (**13**).

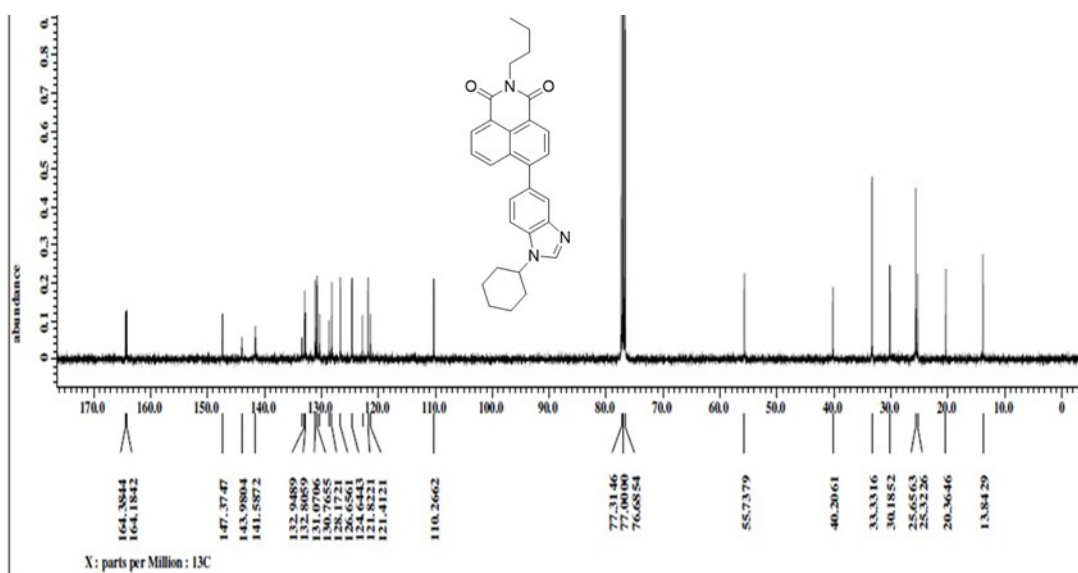

**Figure S32:** <sup>13</sup>C NMR spectrum of 2-butyl-6-(1-cyclohexyl-1H-benzo[d]imidazol-5-yl)-1H-benzo[de]isoquinoline-1,3(2H)-dione (**13**).

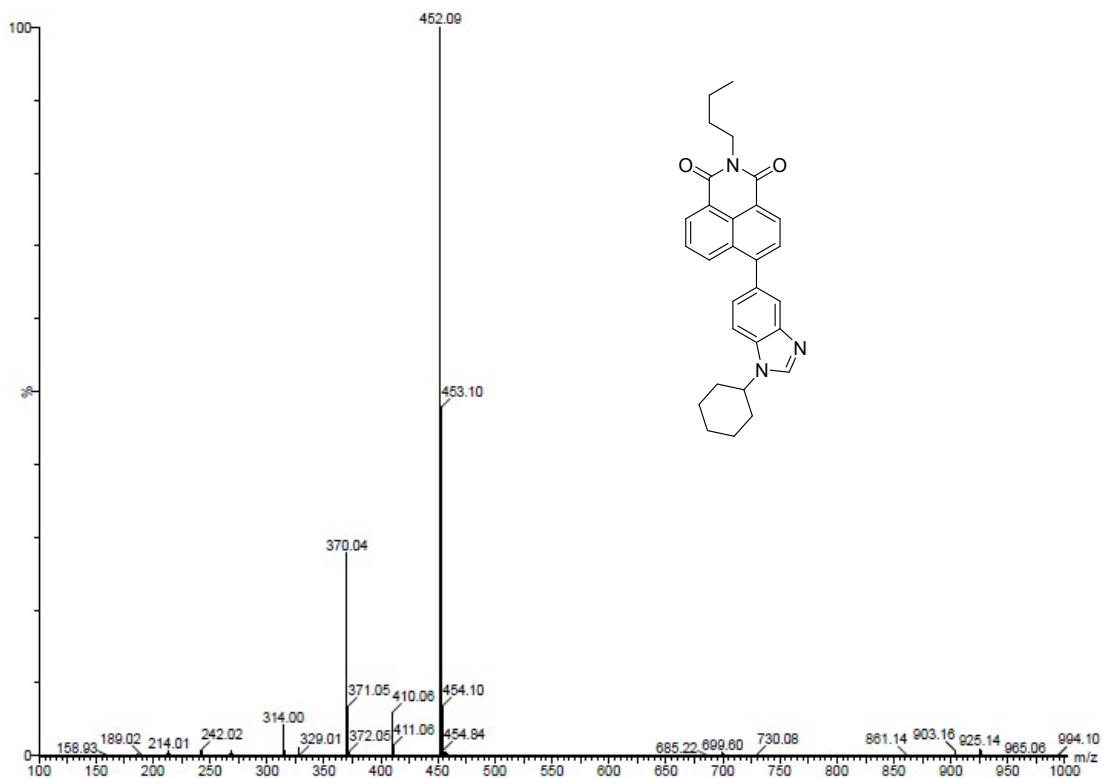

**Figure S33:** Mass spectrum of 2-butyl-6-(1-cyclohexyl-1*H*-benzo[*d*]imidazol-5-yl)-1*H*-benzo[*de*]isoquinoline-1,3(2*H*)-dione (**13**).

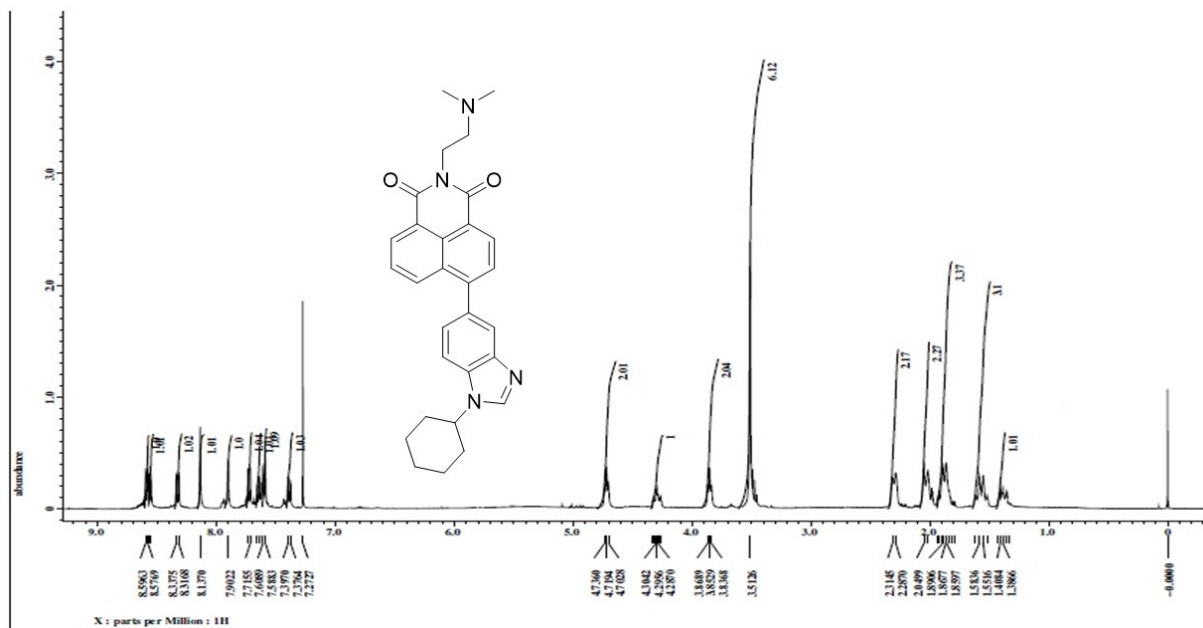

**Figure S34:**  $^1\text{H}$  NMR spectrum of 6-(1-cyclohexyl-1*H*-benzo[*d*]imidazol-5-yl)-2-(dimethylamino)ethyl-1*H*-benzo[*de*]isoquinoline-1,3(2*H*)-dione (**14**).

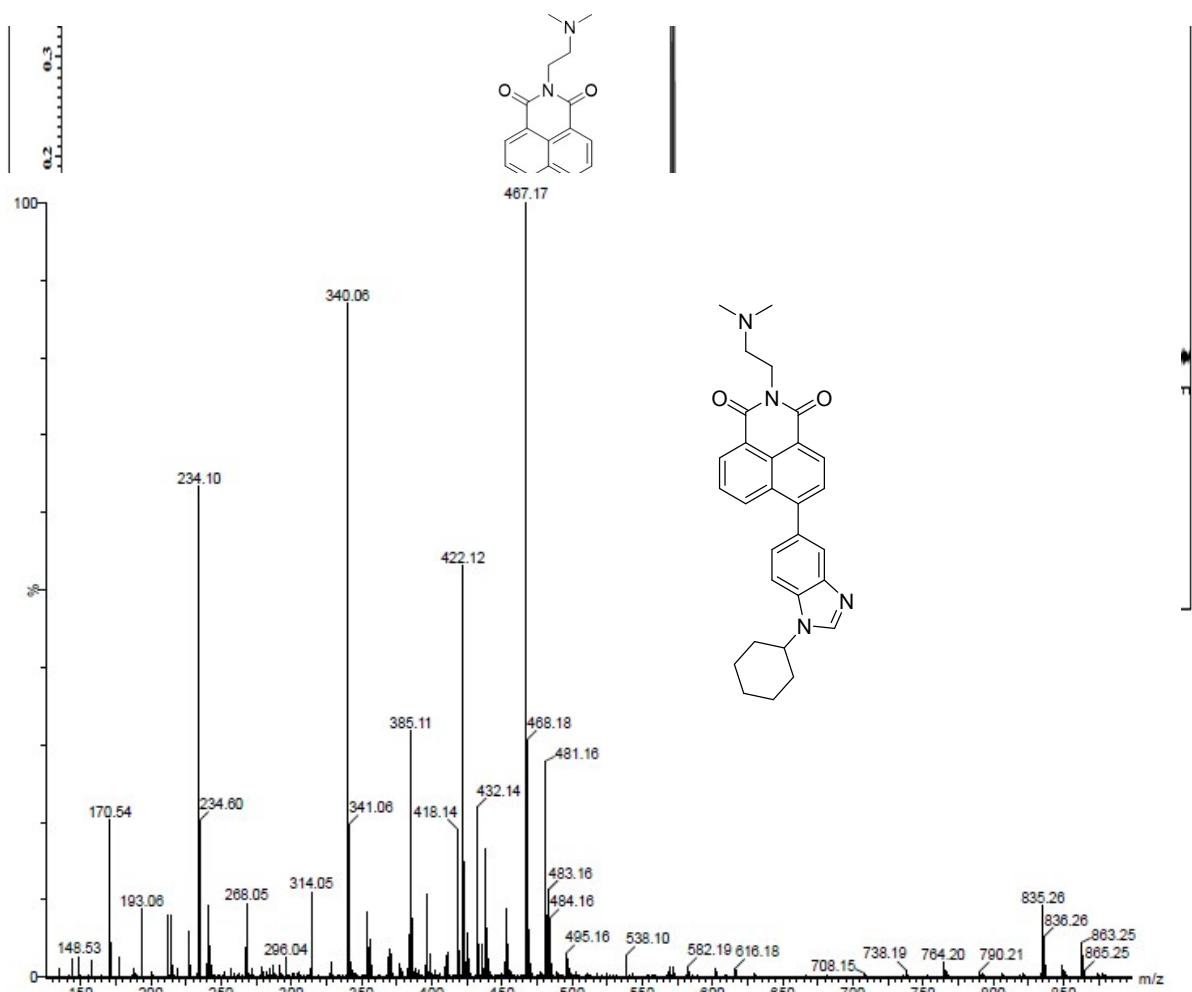

**Figure S35:**  $^{13}\text{C}$  NMR spectrum of 6-(1-cyclohexyl-1*H*-benzo[*d*]imidazol-5-yl)-2-(2-(dimethylamino)ethyl)-1*H*-benzo[*de*]isoquinoline-1,3(2*H*)-dione (**14**).

**Figure S36:** Mass spectrum of 6-(1-cyclohexyl-1*H*-benzo[*d*]imidazol-5-yl)-2-(2-(dimethylamino)ethyl)-1*H*-benzo[*de*]isoquinoline-1,3(2*H*)-dione (**14**).

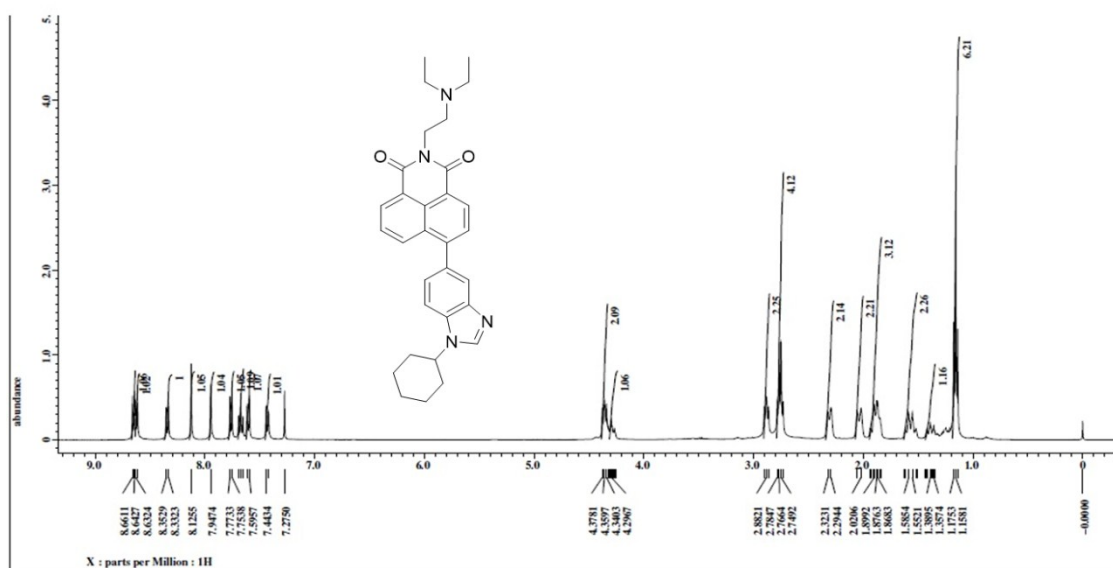

**Figure S37:** <sup>1</sup>H NMR spectrum of 6-(1-cyclohexyl-1H-benzo[d]imidazol-5-yl)-2-(2-(diethylamino)ethyl)-1H-benzo[de]isoquinoline-1,3(2H)-dione (**15**).

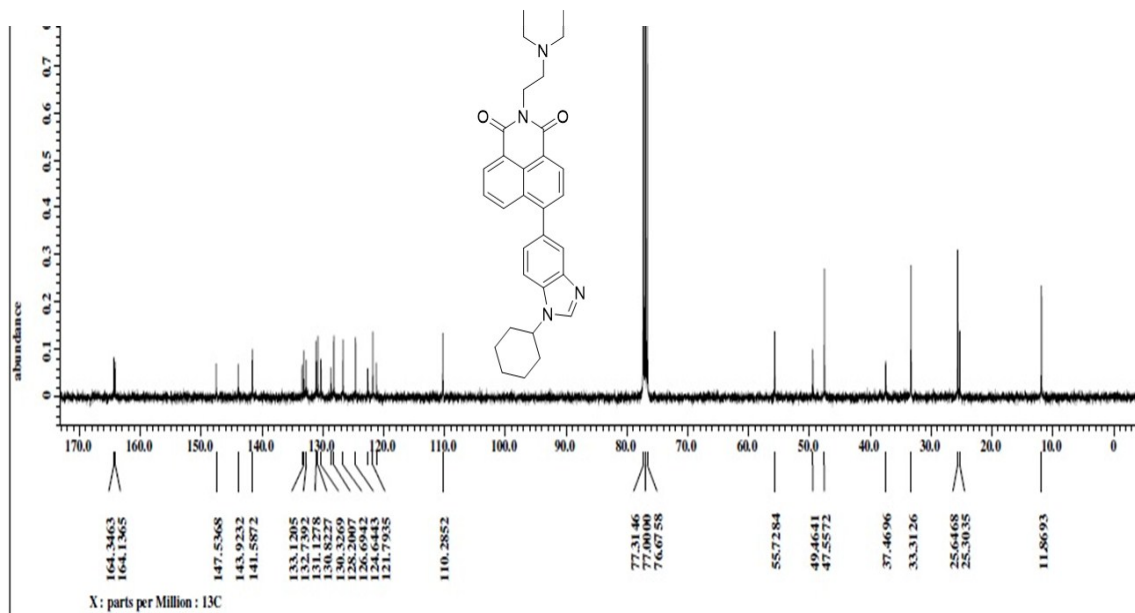

**Figure S38:** <sup>13</sup>C NMR spectrum of 6-(1-cyclohexyl-1H-benzo[d]imidazol-5-yl)-2-(2-(diethylamino)ethyl)-1H-benzo[de]isoquinoline-1,3(2H)-dione (**15**).

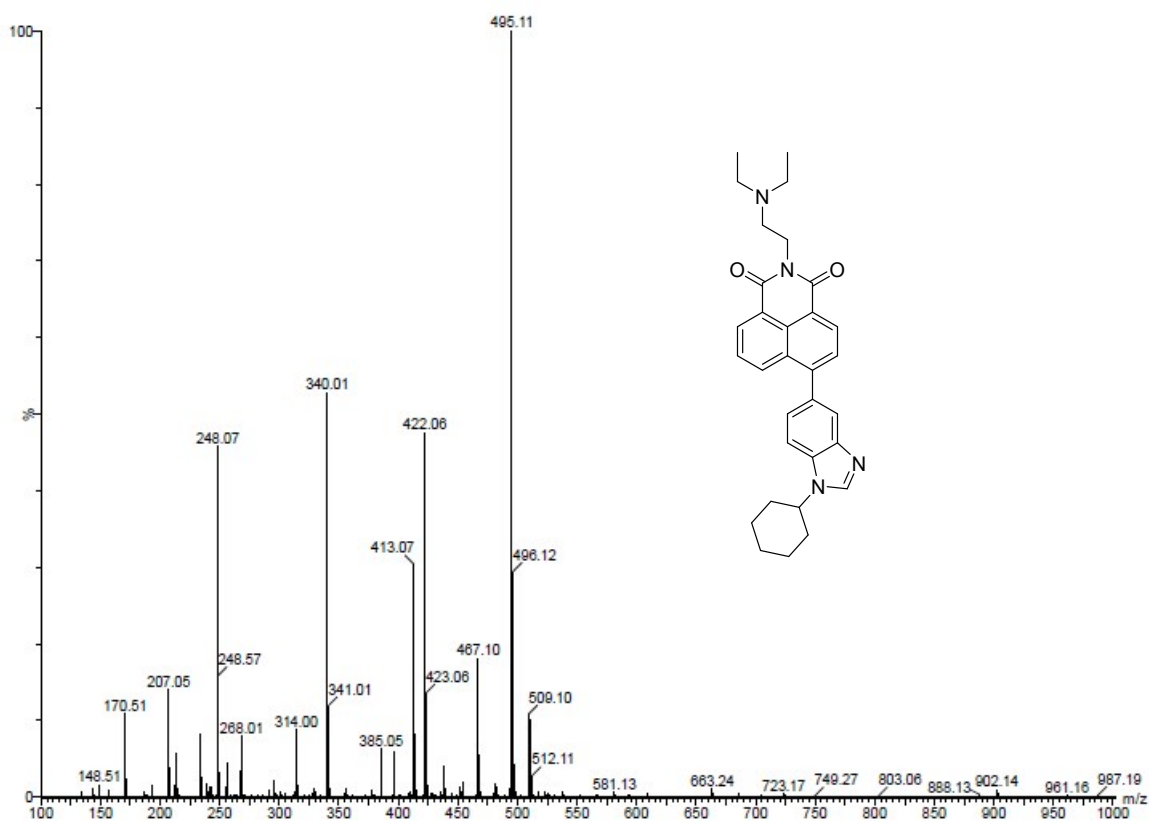

**Figure S39:** Mass spectrum of 6-(1-cyclohexyl-1*H*-benzo[*d*]imidazol-5-yl)-2-(2-(diethylamino)ethyl)-1*H*-benzo[*de*]isoquinoline-1,3(2*H*)-dione (**15**).

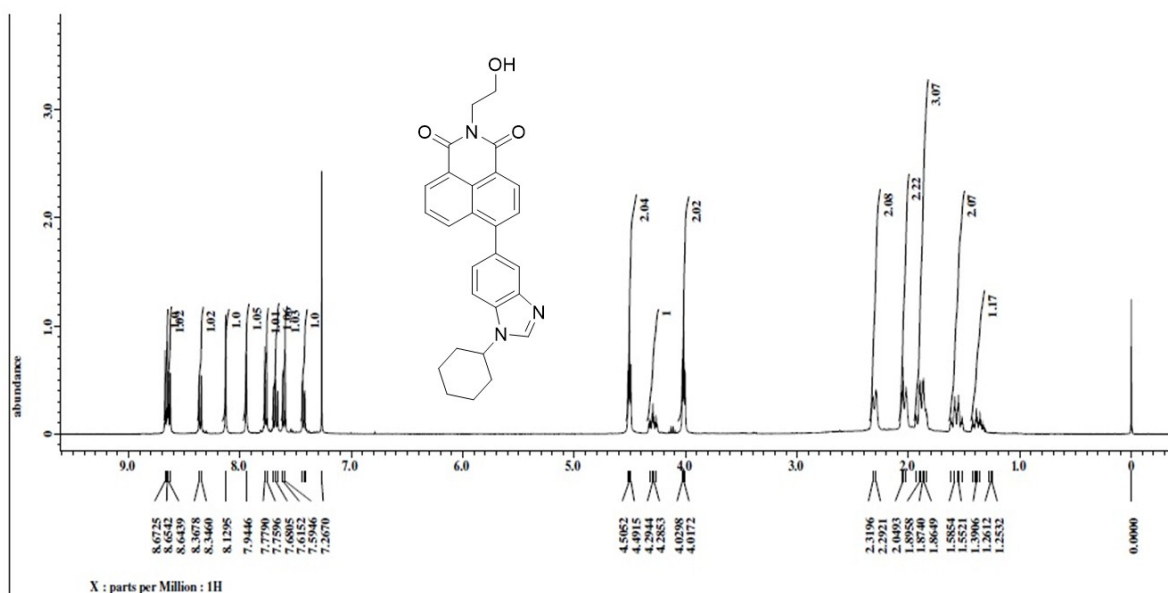

**Figure S40:**  $^1\text{H}$  NMR spectrum of 6-(1-cyclohexyl-1*H*-benzo[*d*]imidazol-5-yl)-2-(2-hydroxyethyl)-1*H*-benzo[*de*]isoquinoline-1,3(2*H*)-dione (**16**).

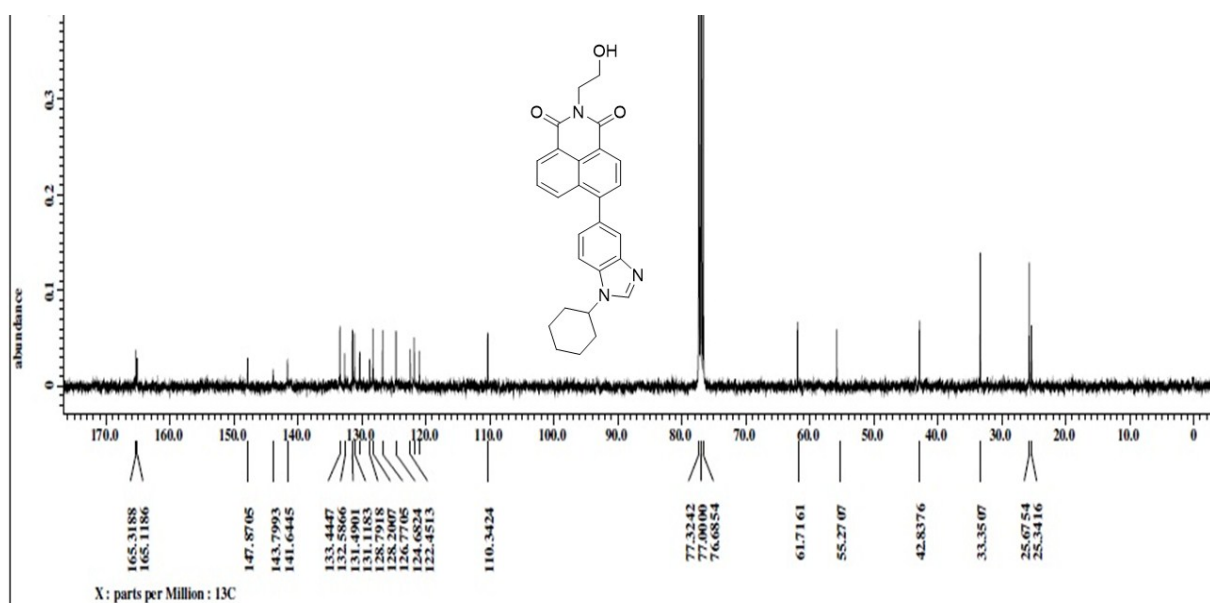

**Figure S41:**  $^{13}\text{C}$  NMR spectrum of 6-(1-cyclohexyl-1*H*-benzo[*d*]imidazol-5-yl)-2-(2-hydroxyethyl)-1*H*-benzo[*de*]isoquinoline-1,3(2*H*)-dione (**16**).

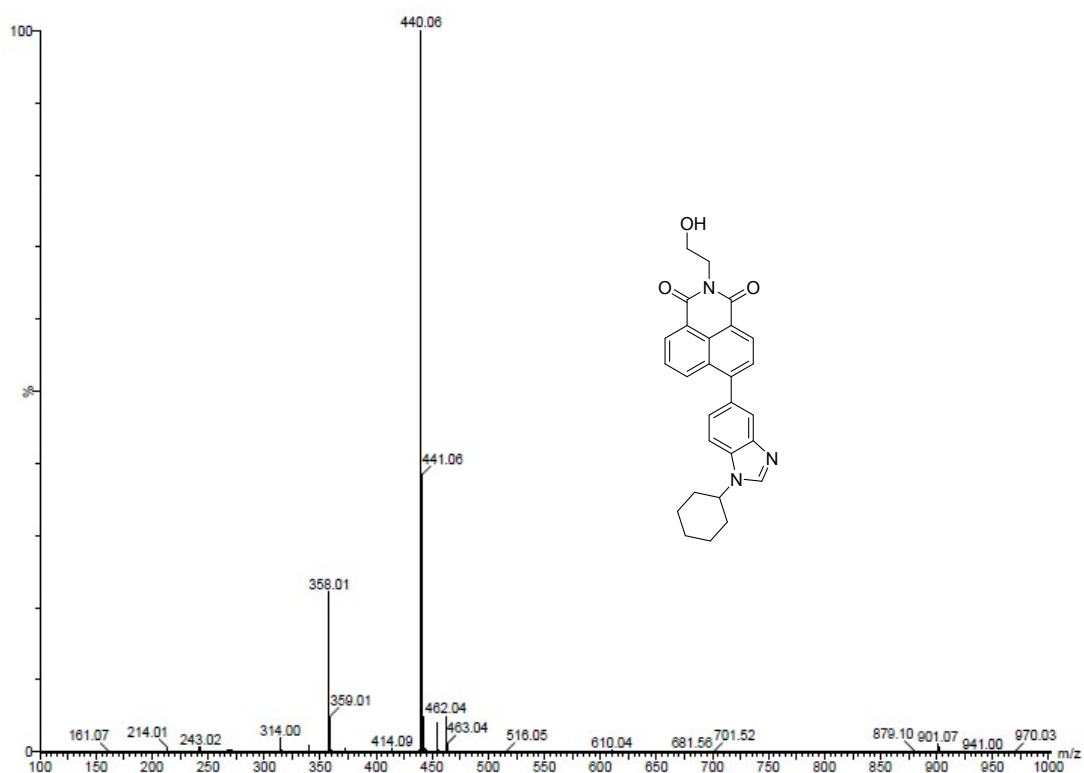

**Figure S42:** Mass spectrum of 6-(1-cyclohexyl-1*H*-benzo[*d*]imidazol-5-yl)-2-(2-hydroxyethyl)-1*H*-benzo[*de*]isoquinoline-1,3(2*H*)-dione (**16**).

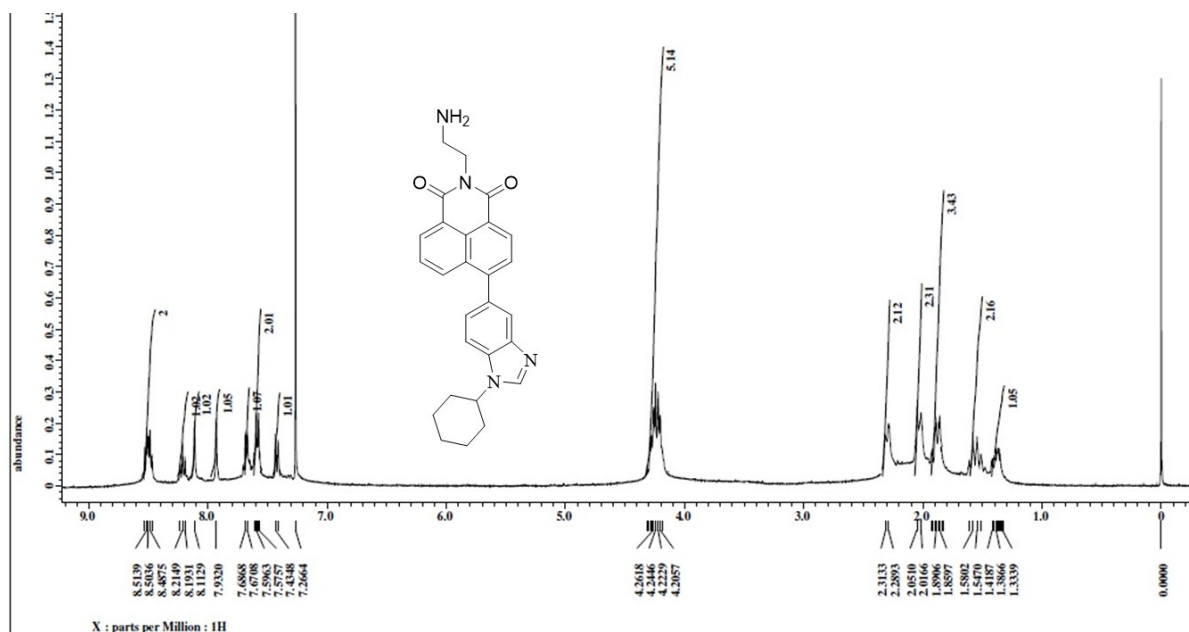

**Figure S43:** <sup>1</sup>H NMR spectrum of 2-(2-aminoethyl)-6-(1-cyclohexyl-1H-benzo[*d*]imidazol-5-yl)-1H-benzo[*de*]isoquinoline-1,3(2H)-dione (**17**).

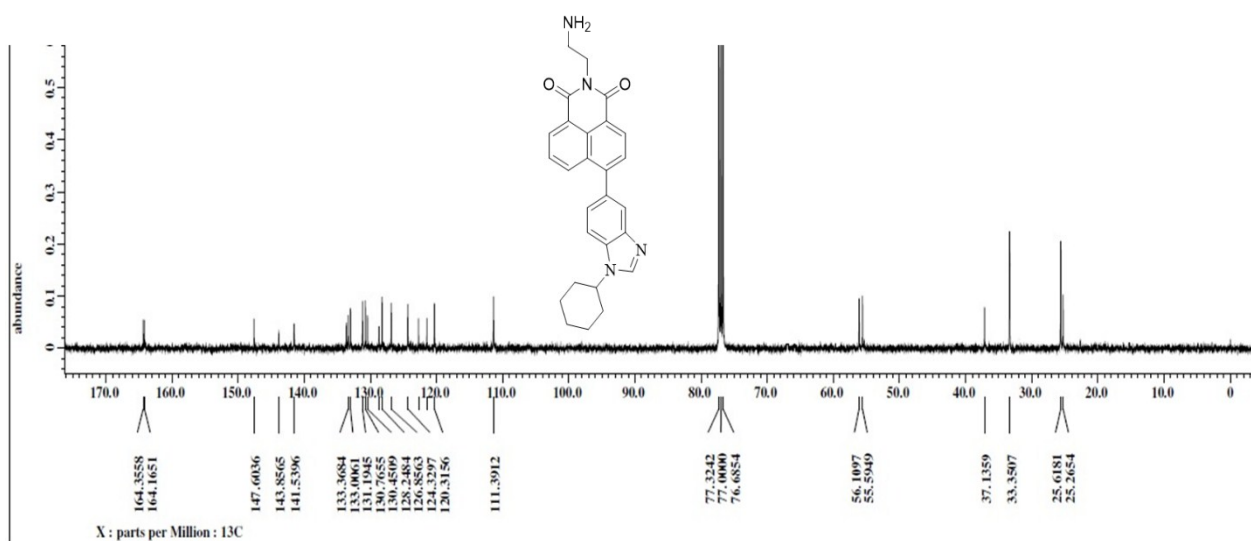

**Figure S44:** <sup>13</sup>C NMR spectrum of 2-(2-aminoethyl)-6-(1-cyclohexyl-1H-benzo[*d*]imidazol-5-yl)-1H-benzo[*de*]isoquinoline-1,3(2H)-dione (**17**).

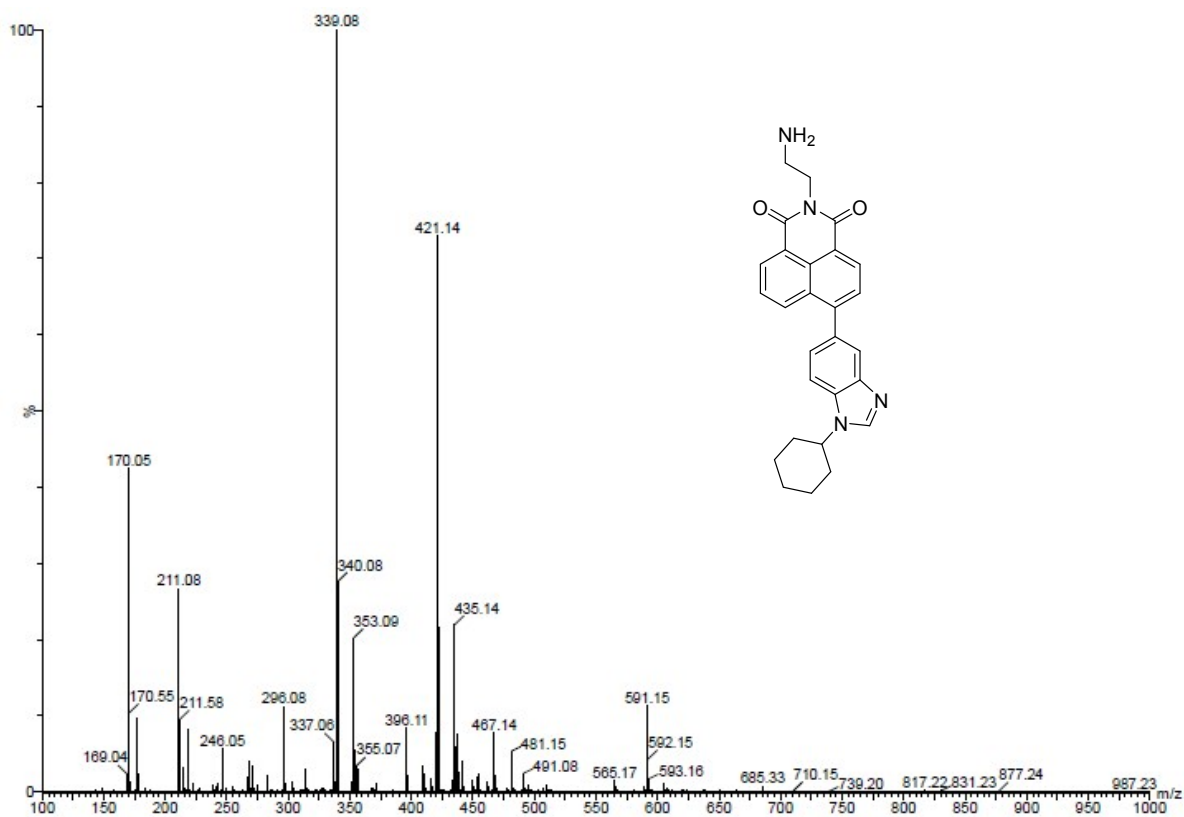

**Figure S45:** Mass spectrum of 2-(2-aminoethyl)-6-(1-cyclohexyl-1H-benzo[d]imidazol-5-yl)-1H-benzo[de]isoquinoline-1,3(2H)-dione (**17**).

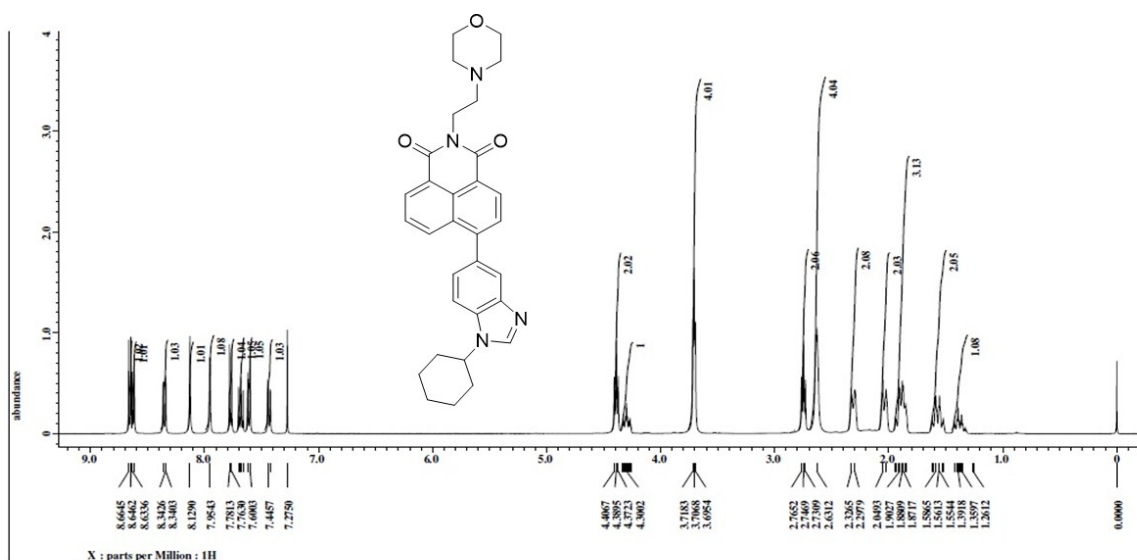

**Figure S46:** <sup>1</sup>H NMR spectrum of 6-(1-cyclohexyl-1H-benzo[d]imidazol-5-yl)-2-(2-morpholinoethyl)-1H-benzo[de]isoquinoline-1,3(2H)-dione (**18**).



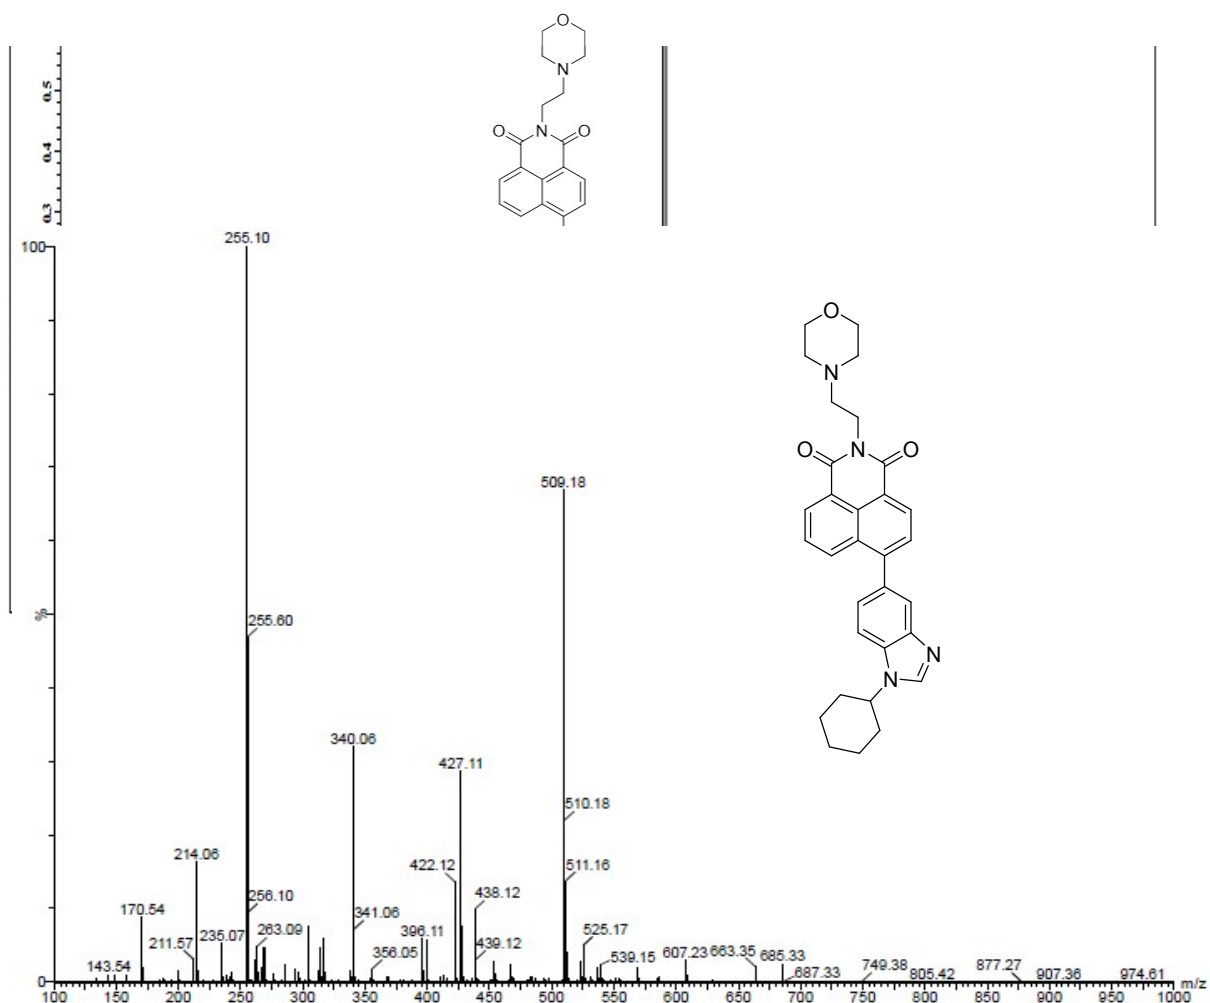

**Figure S47:**  $^{13}\text{C}$  NMR spectrum of 6-(1-cyclohexyl-1H-benzo[*d*]imidazol-5-yl)-2-(2-morpholinoethyl)-1H-benzo[*de*]isoquinoline-1,3(2H)-dione (**18**).

**Figure S48:** Mass spectrum of 6-(1-cyclohexyl-1H-benzo[*d*]imidazol-5-yl)-2-(2-morpholinoethyl)-1H-benzo[*de*]isoquinoline-1,3(2H)-dione (**18**).

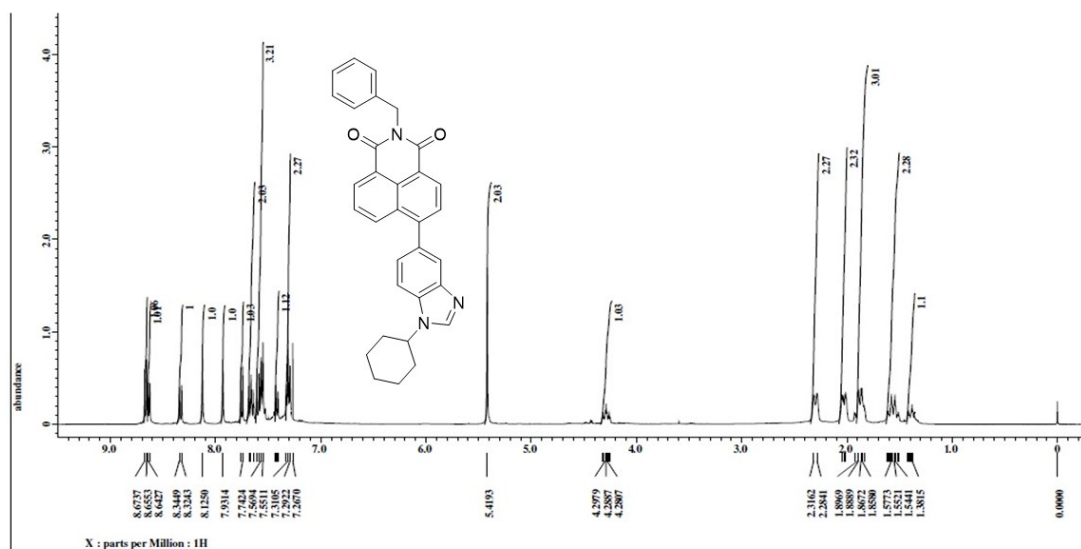

**Figure S49:**  $^1\text{H}$  NMR spectrum of 2-benzyl-6-(1-cyclohexyl-1*H*-benzo[*d*]imidazol-5-yl)-1*H*-benzo[*de*]isoquinoline-1,3(2*H*)-dione (**19**).

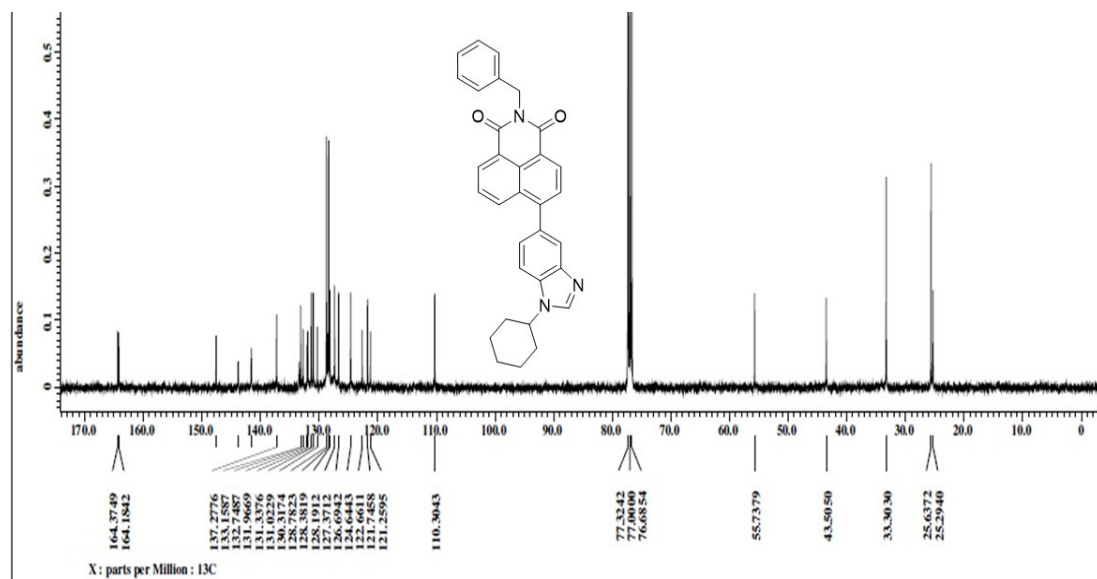

**Figure S50:**  $^{13}\text{C}$  NMR spectrum of 2-benzyl-6-(1-cyclohexyl-1*H*-benzo[*d*]imidazol-5-yl)-1*H*-benzo[*de*]isoquinoline-1,3(2*H*)-dione (**19**).

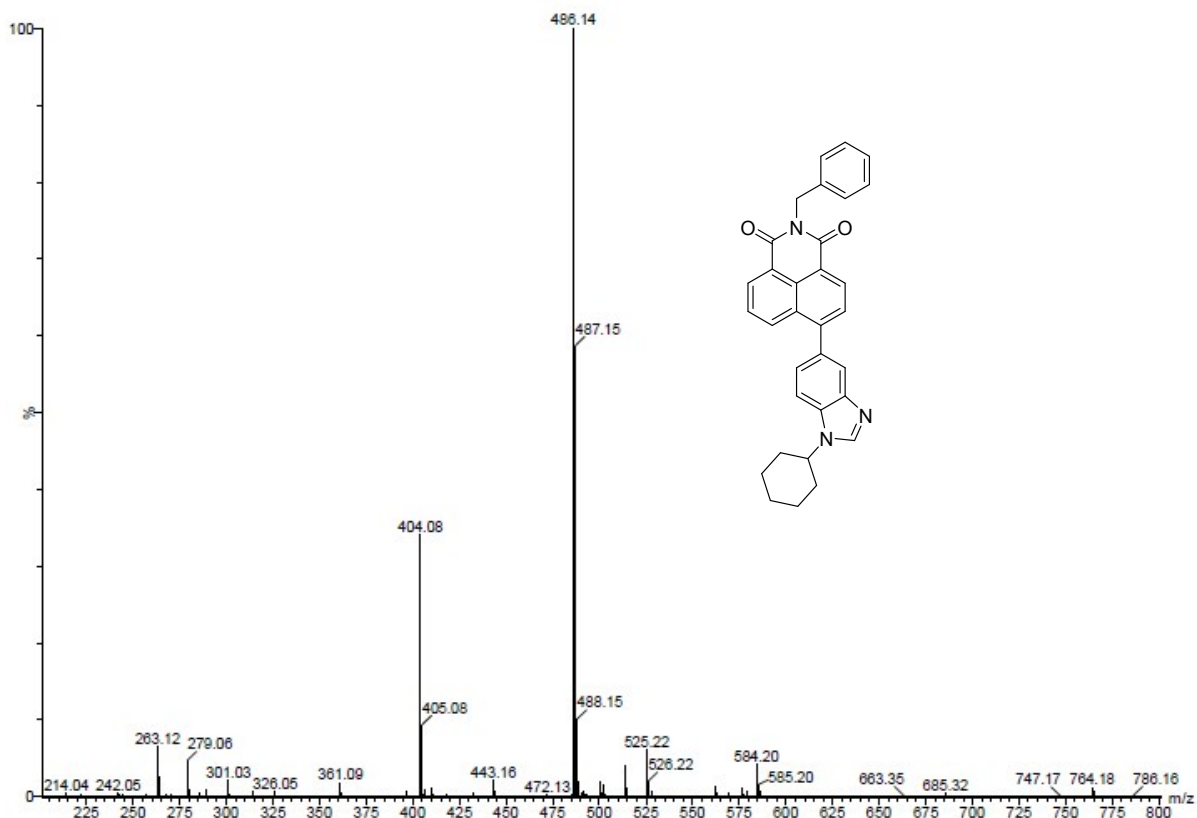

**Figure S51:** Mass spectrum of 2-benzyl-6-(1-cyclohexyl-1H-benzo[*d*]imidazol-5-yl)-1H-benzo[*de*]isoquinoline-1,3(2H)-dione (**19**).

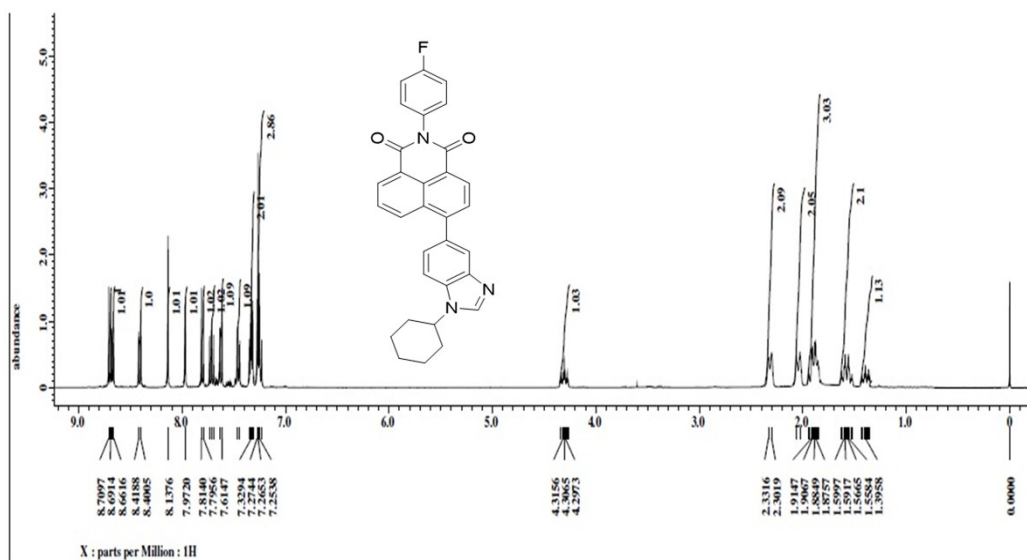

**Figure S52:** <sup>1</sup>H NMR spectrum of 6-(1-cyclohexyl-1H-benzo[*d*]imidazol-5-yl)-2-(4-fluorophenyl)-1H-benzo[*de*]isoquinoline-1,3(2H)-dione (**20**).

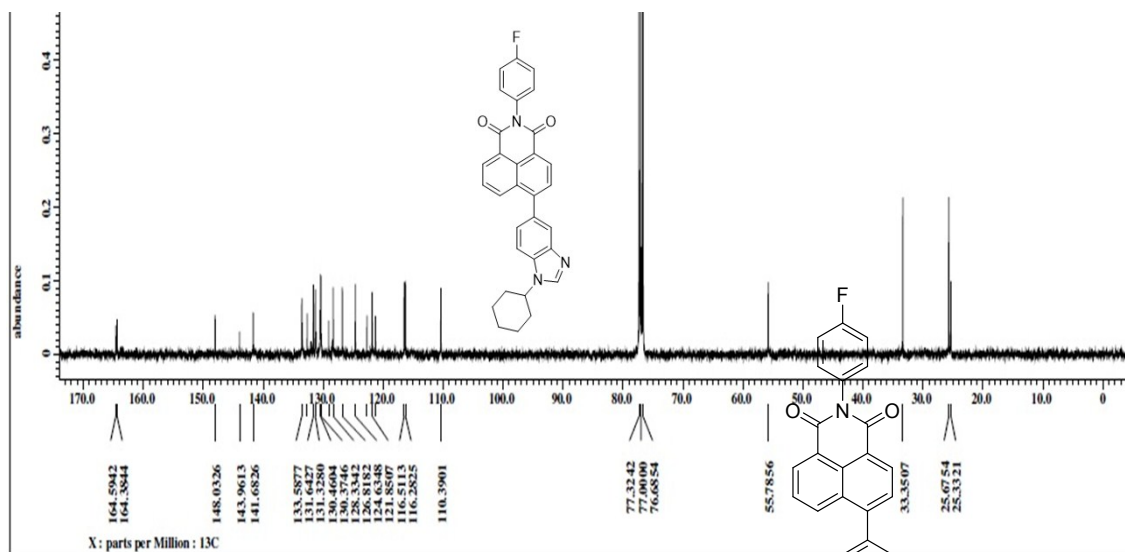

Figure S53:  $^{13}\text{C}$  NMR spectrum of 6-(1-cyclohexyl-1*H*-benzo[*d*]imidazol-5-yl)-2-(4-fluorophenyl)-1*H*-benzo[*de*]isoquinoline-1,3(2*H*)-dione (**20**).

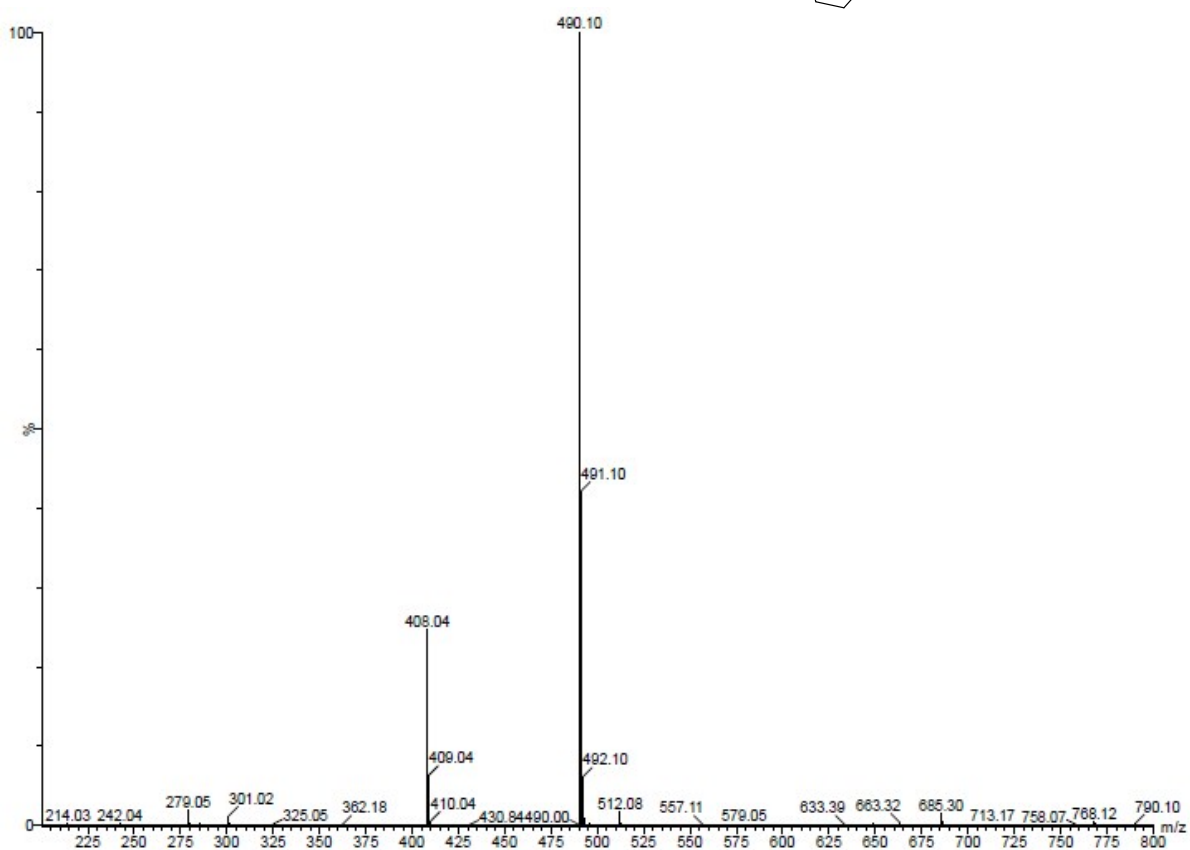

Figure S54: Mass spectrum of 6-(1-cyclohexyl-1*H*-benzo[*d*]imidazol-5-yl)-2-(4-fluorophenyl)-1*H*-benzo[*de*]isoquinoline-1,3(2*H*)-dione (**20**).

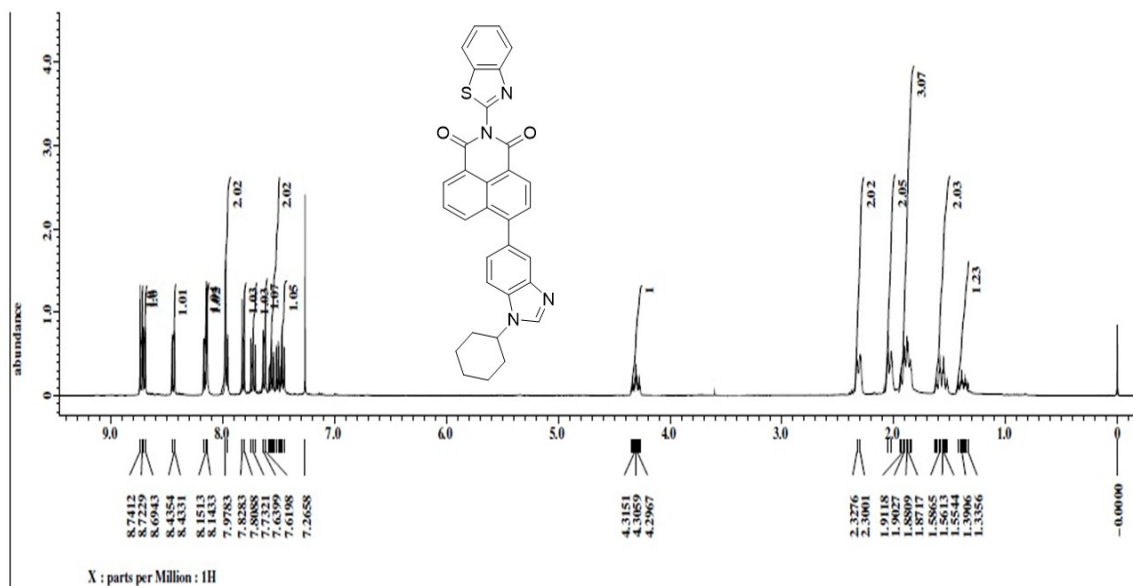

**Figure S55:**  $^1\text{H}$  NMR spectrum of 2-(benzo[*d*]thiazol-2-yl)-6-(1-cyclohexyl-1*H*-benzo[*d*]imidazol-5-yl)-1*H*-benzo[*de*]isoquinoline-1,3(2*H*)-dione (**21**).

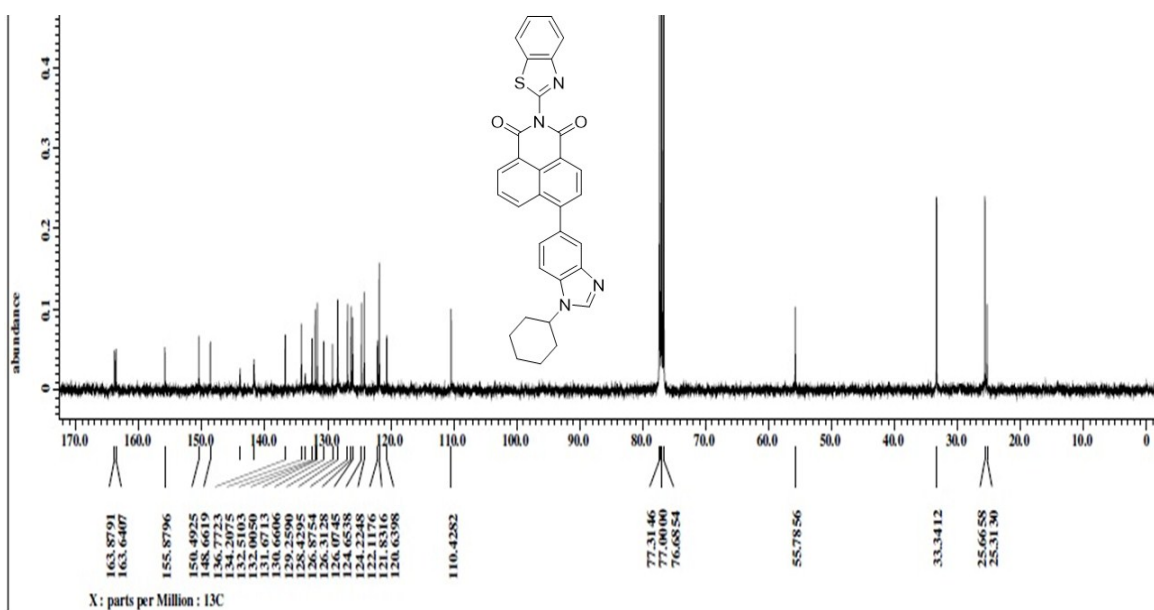

**Figure S56:**  $^{13}\text{C}$  NMR spectrum of 2-(benzo[*d*]thiazol-2-yl)-6-(1-cyclohexyl-1*H*-benzo[*d*]imidazol-5-yl)-1*H*-benzo[*de*]isoquinoline-1,3(2*H*)-dione (**21**).

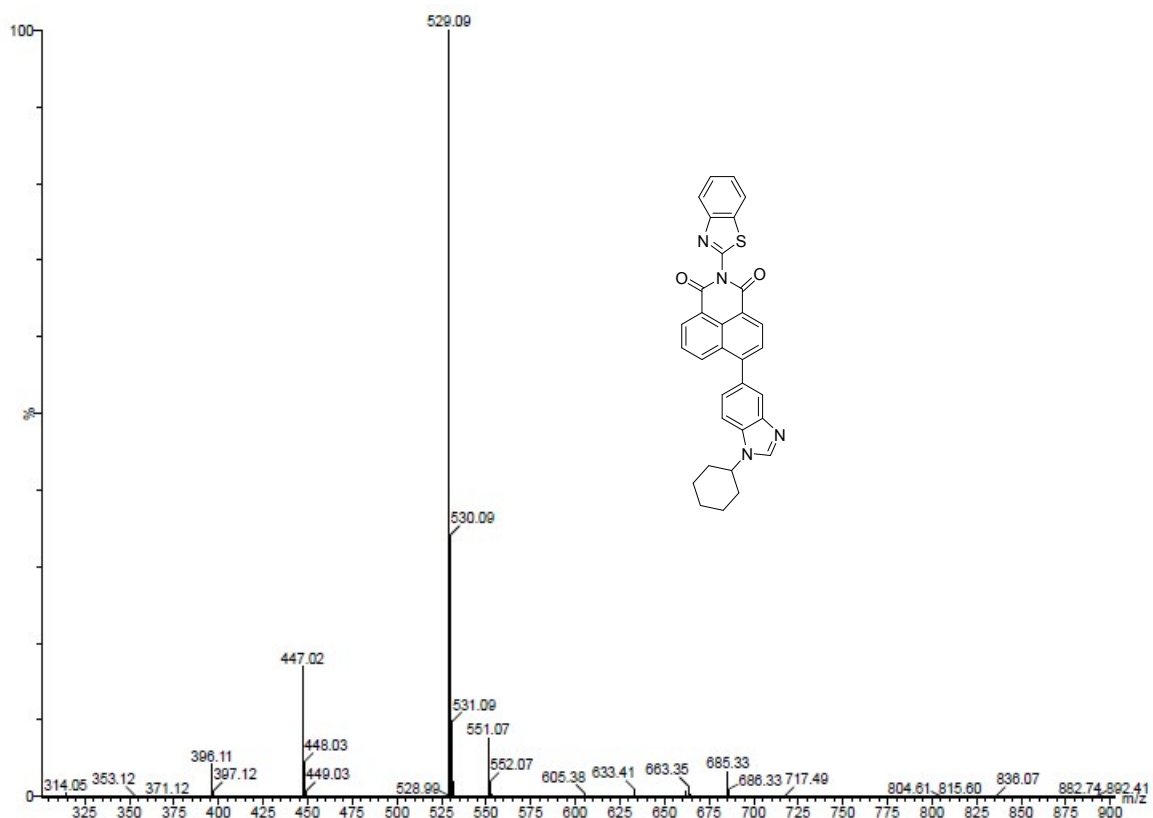

**Figure S57:** Mass spectrum of 2-(benzo[d]thiazol-2-yl)-6-(1-cyclohexyl-1H-benzo[d]imidazol-5-yl)-1H-benzo[de]isoquinoline-1,3(2H)-dione (**21**).

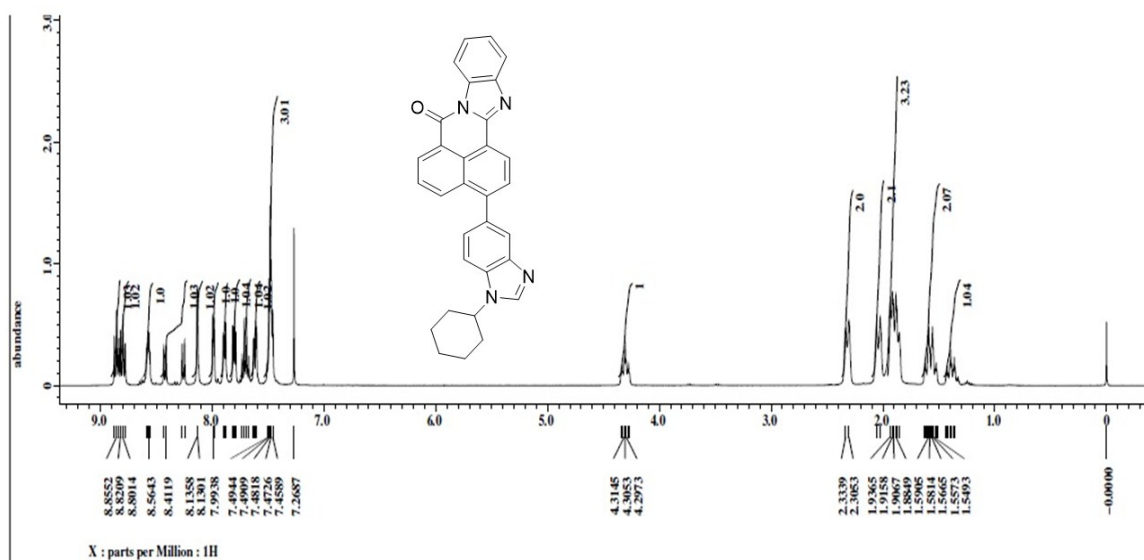

**Figure S58:** <sup>1</sup>H NMR spectrum of 3-(1-cyclohexyl-1H-benzo[d]imidazol-5-yl)-7H-benzo[de]benzo[4,5]imidazo[2,1-a]isoquinolin-7-one (**22**).

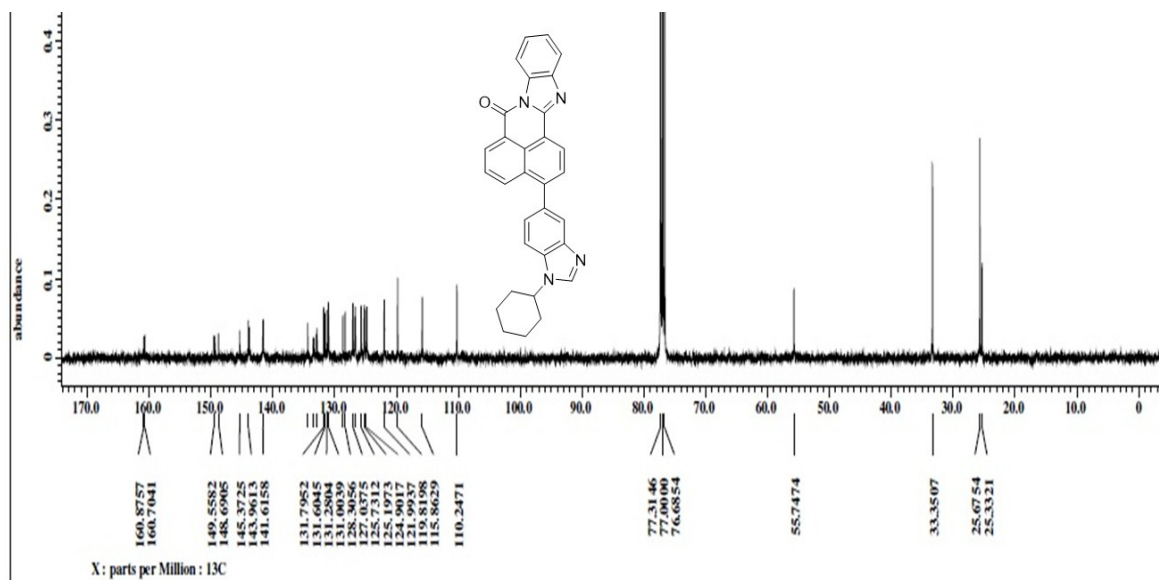

**Figure S59:**  $^{13}\text{C}$  NMR spectrum of 3-(1-cyclohexyl-1H-benzo[*d*]imidazol-5-yl)-7H-benzo[*de*]benzo[4,5]imidazo[2,1-*a*]isoquinolin-7-one (**22**).

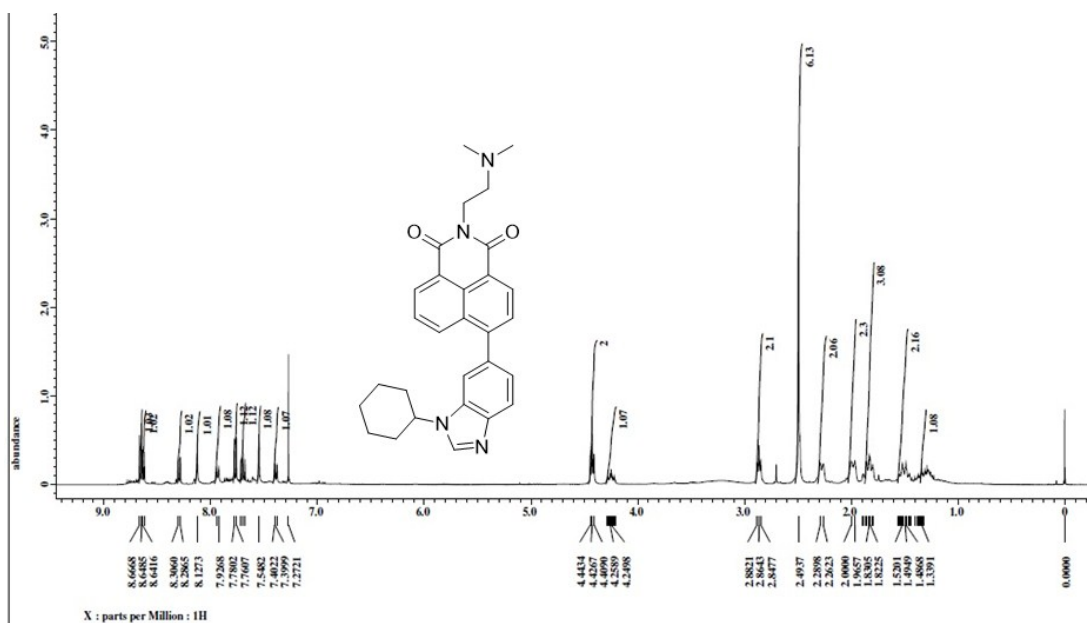

**Figure S60:**  $^1\text{H}$  NMR spectrum of 6-(1-cyclohexyl-1H-benzo[*d*]imidazol-6-yl)-2-(2-(dimethylamino)ethyl)-1H-benzo[*de*]isoquinoline-1,3(2H)-dione (**23**).

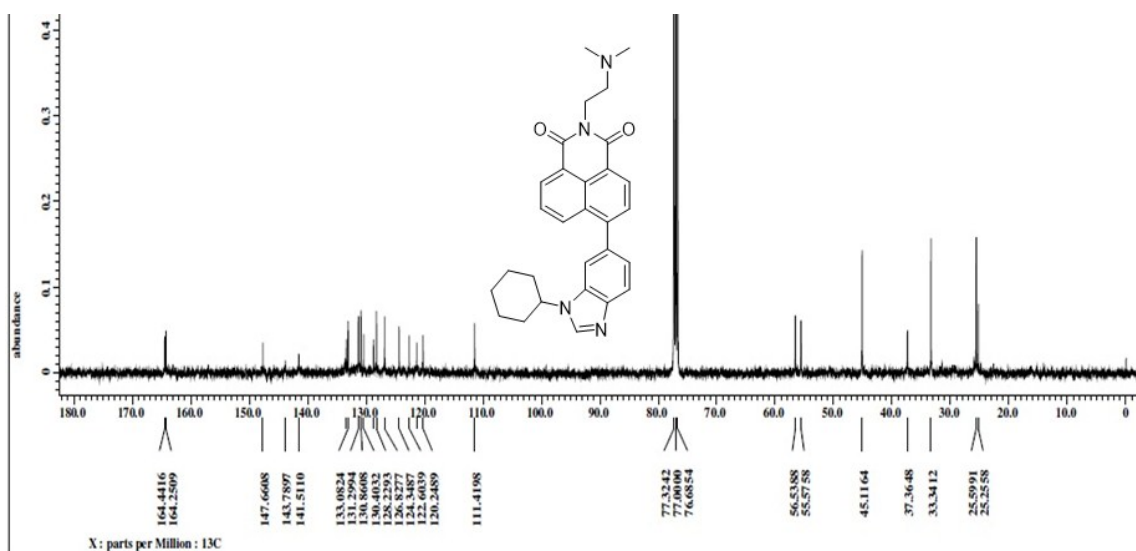

**Figure S61:**  $^{13}\text{C}$  NMR spectrum of 6-(1-cyclohexyl-1H-benzo[*d*]imidazol-6-yl)-2-(2-(dimethylamino)ethyl)-1H-benzo[*de*]isoquinoline-1,3(2H)-dione (**23**).

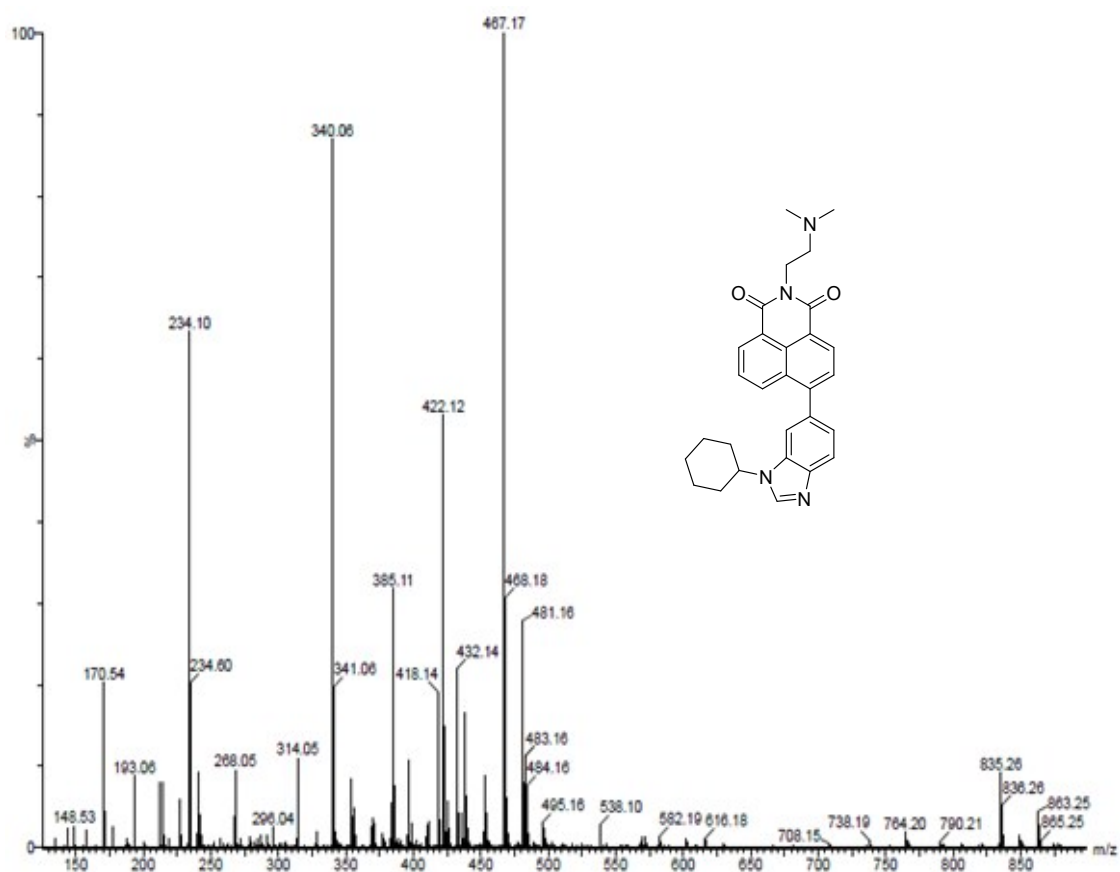

**Figure S62:** Mass spectrum of 6-(1-cyclohexyl-1H-benzo[*d*]imidazol-6-yl)-2-(2-(dimethylamino)ethyl)-1H-benzo[*de*]isoquinoline-1,3(2H)-dione (**23**).



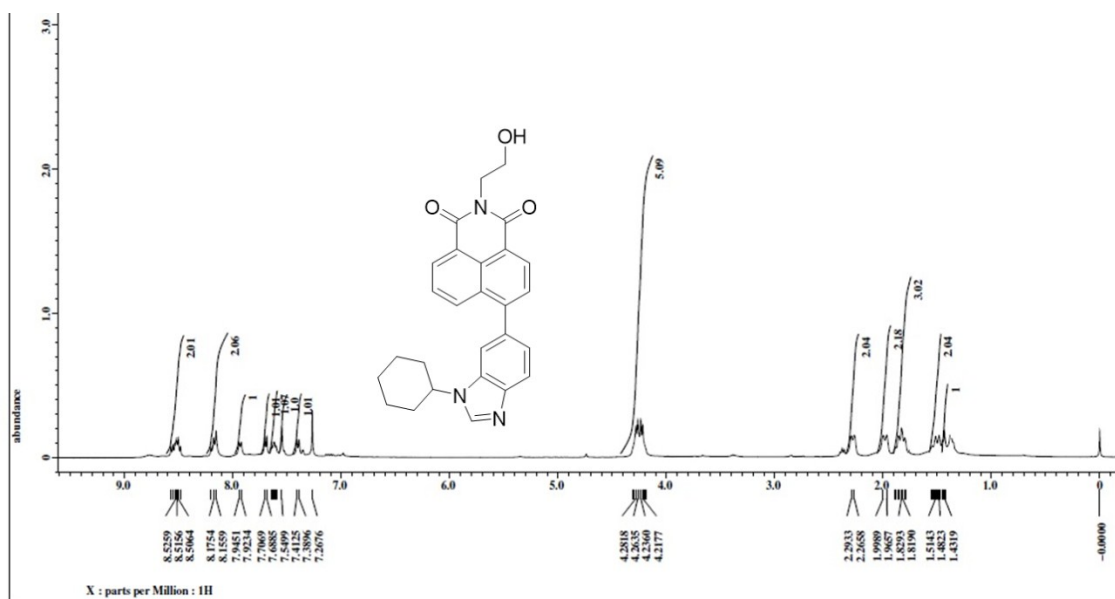

**Figure S63:**  $^1\text{H}$  NMR spectrum of 6-(1-cyclohexyl-1*H*-benzo[*d*]imidazol-6-yl)-2-(2-hydroxyethyl)-1*H*-benzo[*de*]isoquinoline-1,3(2*H*)-dione (**24**).

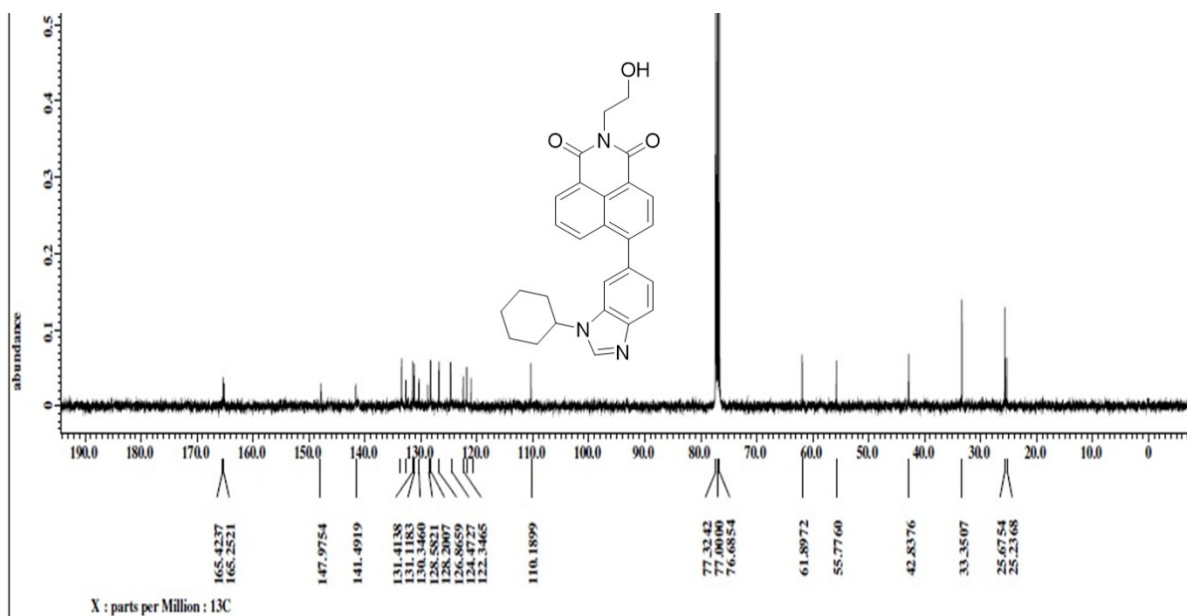

**Figure S64:**  $^{13}\text{C}$  NMR spectrum of 6-(1-cyclohexyl-1*H*-benzo[*d*]imidazol-6-yl)-2-(2-hydroxyethyl)-1*H*-benzo[*de*]isoquinoline-1,3(2*H*)-dione (**24**).

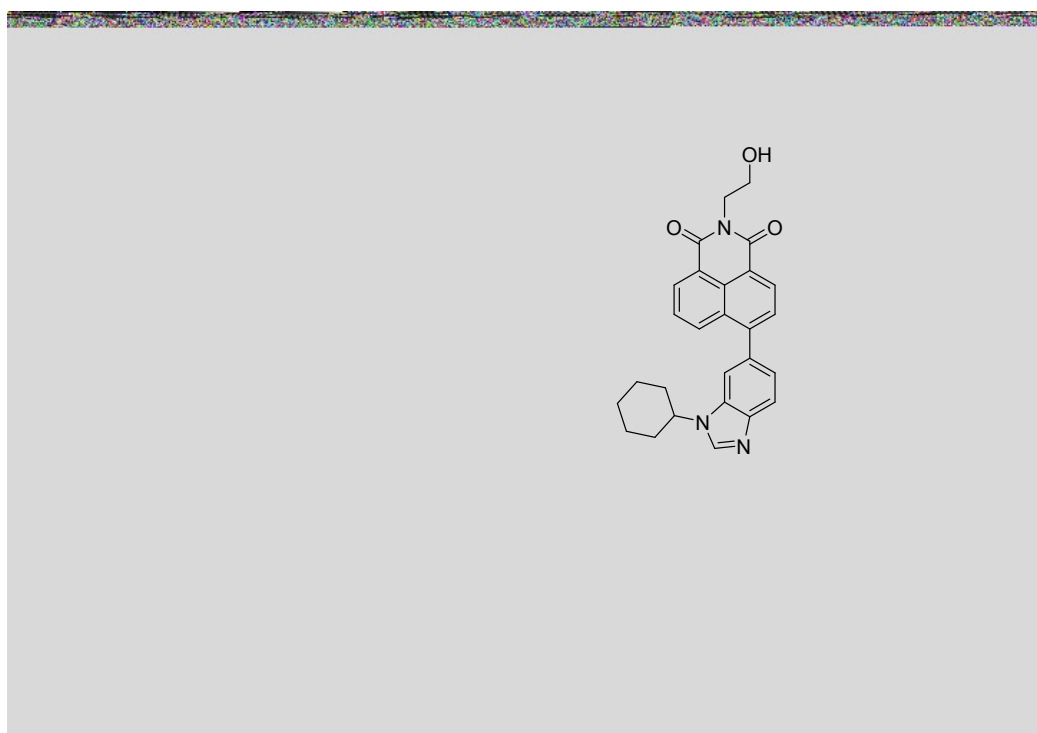

**Figure S65:** Mass spectrum of 6-(1-cyclohexyl-1*H*-benzo[*d*]imidazol-6-yl)-2-(2-hydroxyethyl)-1*H*-benzo[*de*]isoquinoline-1,3(2*H*)-dione (**24**).

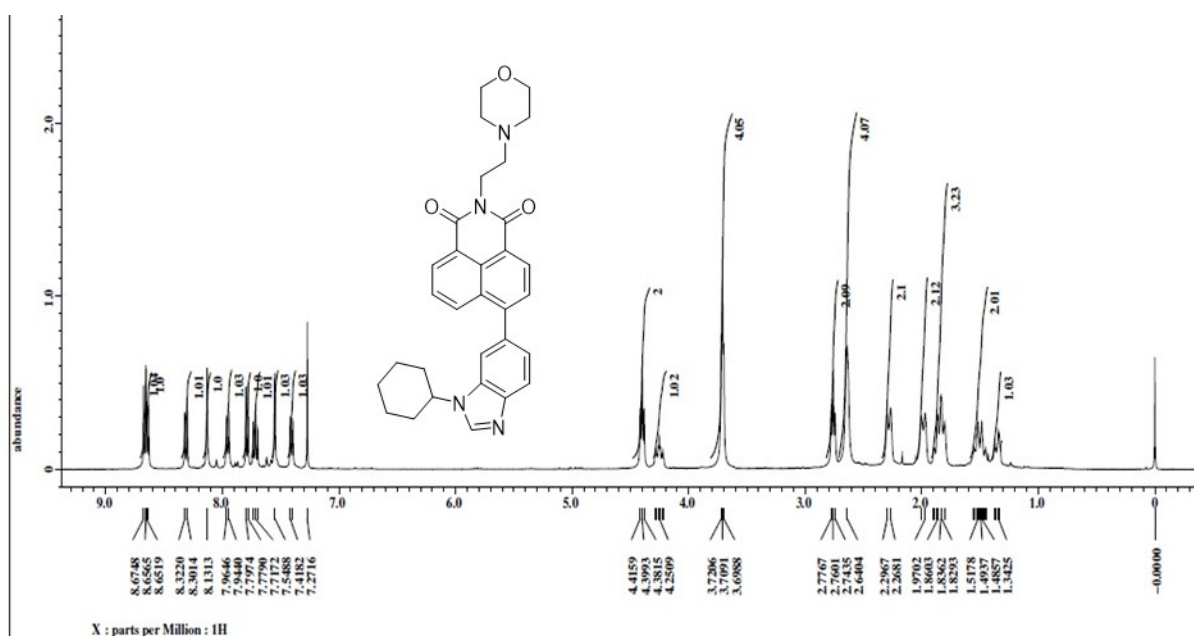

**Figure S66:**  $^1\text{H}$  NMR spectrum of 6-(1-cyclohexyl-1*H*-benzo[*d*]imidazol-6-yl)-2-(2-morpholinoethyl)-1*H*-benzo[*de*]isoquinoline-1,3(2*H*)-dione (**25**).

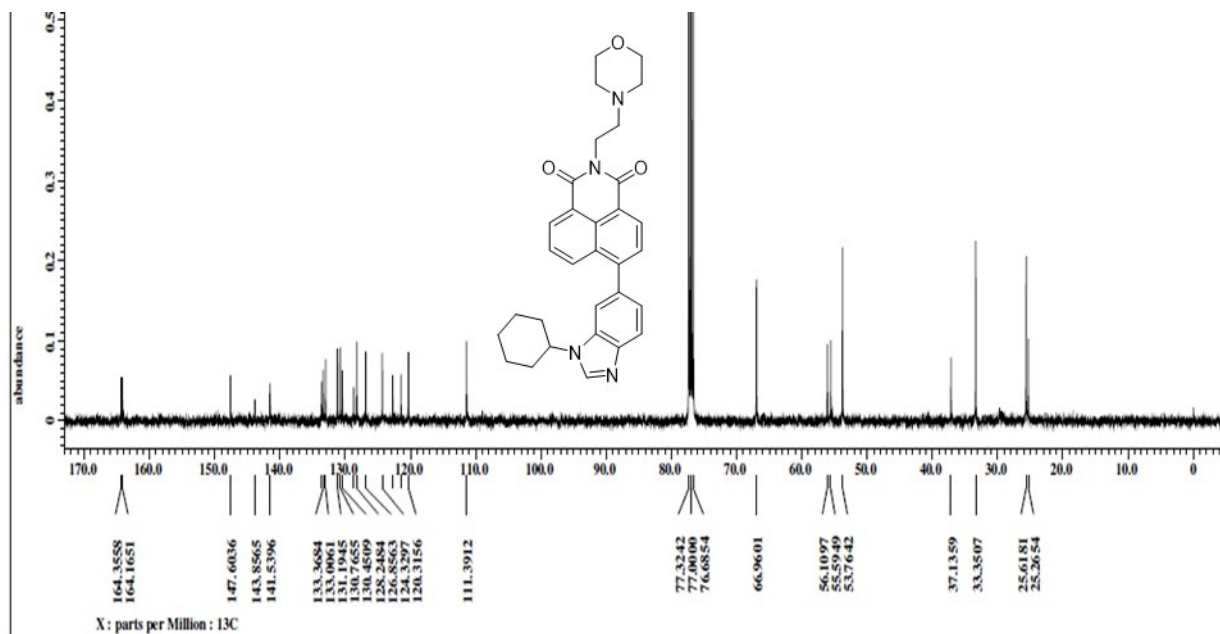

**Figure S67:**  $^{13}\text{C}$  NMR spectrum of 6-(1-cyclohexyl-1*H*-benzo[*d*]imidazol-6-yl)-2-(2-morpholinoethyl)-1*H*-benzo[*de*]isoquinoline-1,3(2*H*)-dione (**25**).

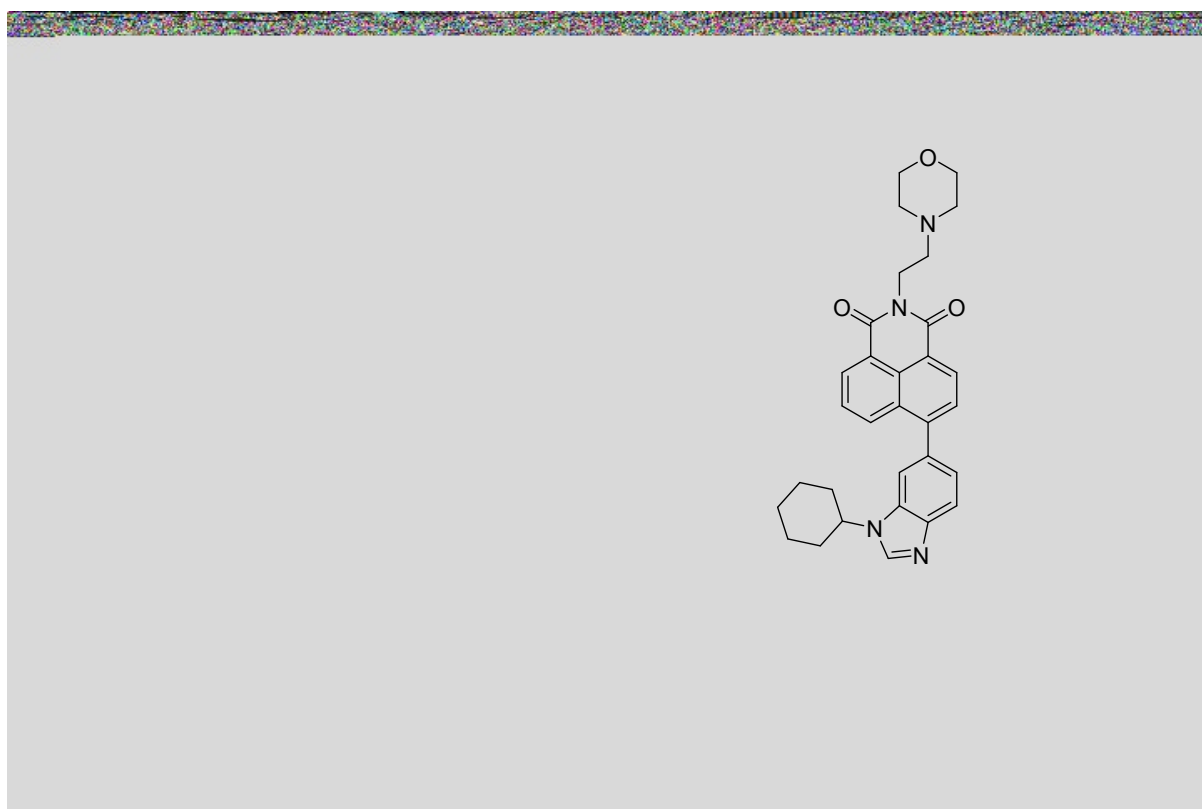

**Figure S68:** Mass spectrum of 6-(1-cyclohexyl-1*H*-benzo[*d*]imidazol-6-yl)-2-(2-morpholinoethyl)-1*H*-benzo[*de*]isoquinoline-1,3(2*H*)-dione (**25**).

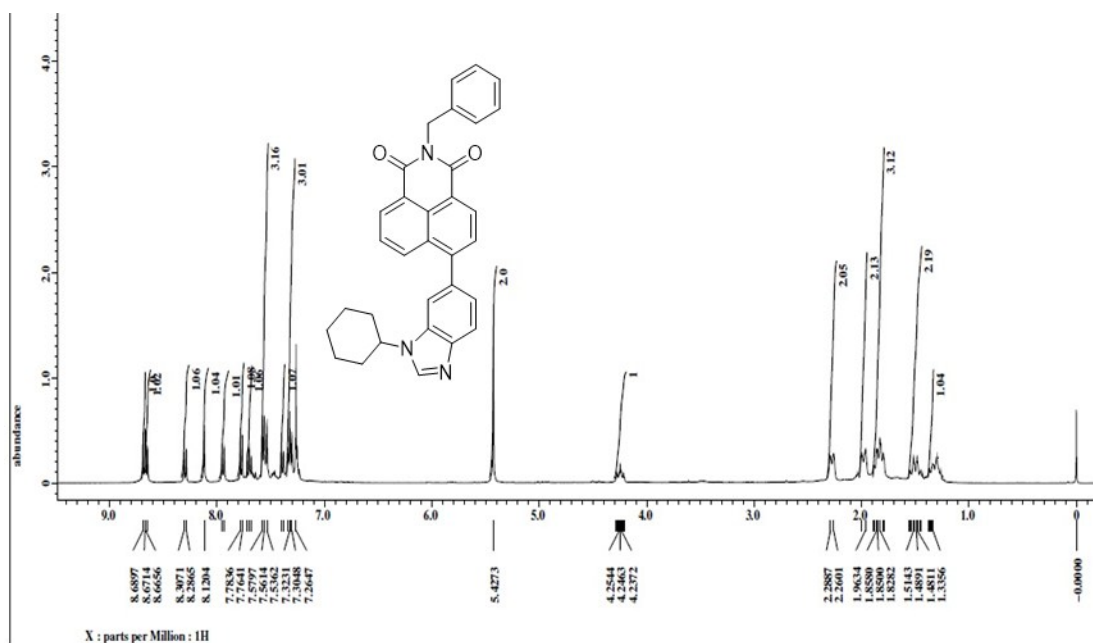

**Figure S69:** <sup>1</sup>H NMR spectrum of 2-benzyl-6-(1-cyclohexyl-1H-benzo[d]imidazol-6-yl)-1H-benzo[de]isoquinoline-1,3(2H)-dione (**26**).

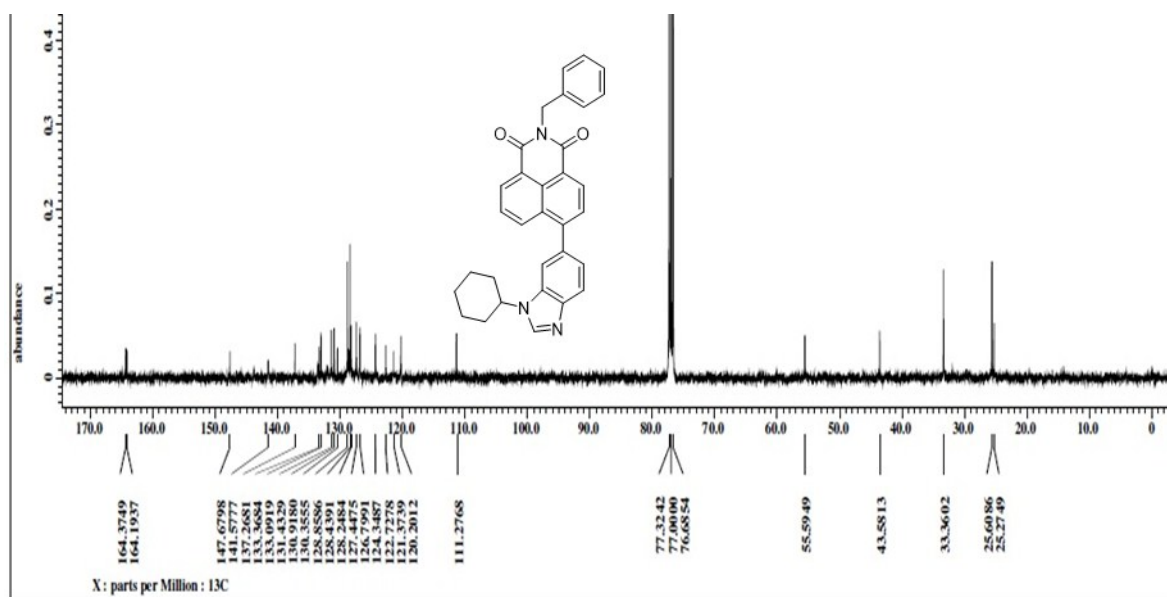

**Figure S70:** <sup>13</sup>C NMR spectrum of 2-benzyl-6-(1-cyclohexyl-1H-benzo[d]imidazol-6-yl)-1H-benzo[de]isoquinoline-1,3(2H)-dione (**26**).

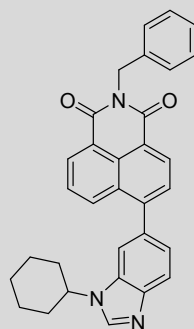

**Figure S71:** Mass spectrum of 2-benzyl-6-(1-cyclohexyl-1H-benzo[*d*]imidazol-6-yl)-1H-benzo[*de*]isoquinoline-1,3(2H)-dione (**26**).

**Table S1.** Percent growth inhibition of compounds **9a-b**, **10b** and **11-16** at one dose concentration level ( $10^{-5}$  M)

| Cell Panel                 | Cell Line | 9a    | 9b    | 10b   | 11    | 12    | 13    | 14    | 15     | 16    |
|----------------------------|-----------|-------|-------|-------|-------|-------|-------|-------|--------|-------|
| Leukemia                   | CCRF-CEM  | 13.46 | 0.74  | 27.58 | 67.01 | 30.87 | --    | 63.33 | 88.63  | 20.98 |
|                            | HL-60(TB) | 20.74 | 5.71  | 27.38 | 74.51 | 14.08 | 0.33  | 33.55 | -15.20 | --    |
|                            | K-562     | 24.85 | 17.17 | 43.49 | 73.82 | NT    | 14.04 | NT    | -14.20 | NT    |
|                            | MOLT-4    | 11.56 | 8.40  | 65.32 | 94.60 | 27.66 | 5.30  | 82.74 | -9.62  | 28.12 |
|                            | RPMI-8226 | 24.63 | 9.04  | 42.76 | 70.46 | 48.67 | --    | 73.24 | -32.97 | 33.73 |
|                            | SR        | 22.34 | 20.64 | 56.83 | 60.25 | 15.27 | 8.94  | 61.09 | -13.96 | 15.28 |
| Non-Small Cell Lung Cancer | A549/ATCC | --    | --    | 38.72 | 41.74 | 2.94  | 9.19  | 53.16 | 81.16  | 4.44  |
| Cell Lung Cancer           | EXVX      | 2.02  | 2.93  | 14.96 | 47.08 | 21.36 | 0.22  | 33.42 | 84.37  | 23.65 |
|                            | HOP-62    | --    | 4.65  | 30.45 | 32.86 | 10.23 | 14.77 | 46.10 | 91.28  | 18.08 |
|                            | HOP-92    | 15.76 | 8.35  | NT    | 67.59 | 63.12 | 5.42  | 75.13 | -7.68  | 48.94 |
|                            | NCI-H226  | --    | --    | 19.55 | 55.15 | 6.56  | --    | 28.42 | -29.93 | 23.01 |

|          |             |       |       |       |        |       |       |       |        |       |
|----------|-------------|-------|-------|-------|--------|-------|-------|-------|--------|-------|
|          | NCI-H23     | 5.81  | 11.12 | 12.04 | 49.48  | 8.94  | 4.03  | 45.36 | 79.81  | 21.39 |
|          | NCI-H322M   | 2.37  | 12.29 | 8.91  | 6.15   | --    | --    | 36.99 | 56.83  | 8.19  |
|          | NCI-H460    | 13.35 | --    | 39.55 | 41.76  | 1.02  | --    | 79.49 | -30.87 | 5.90  |
|          | NCI-H522    | --    | 20.09 | 51.23 | 48.04  | 15.71 | 30.43 | 43.63 | 78.66  | 26.26 |
| Colon    | COLO 205    | --    | --    | 27.32 | 52.98  | --    | 5.97  | 50.74 | -20.39 | --    |
| Cancer   | HCC-2998    | 12.39 | 3.46  | 9.15  | 24.83  | 6.52  | --    | 29.51 | 63.35  | 6.80  |
|          | HCT-116     | 6.03  | 5.54  | 25.47 | 68.04  | 23.21 | 8.30  | 75.47 | -66.14 | 19.98 |
|          | HCT-15      | --    | --    | 15.42 | 55.05  | 11.33 | --    | 64.12 | 91.39  | 1.55  |
|          | HT29        | 11.02 | 1.93  | 30.65 | 76.57  | 18.58 | 15.90 | 68.61 | 99.26  | 16.43 |
|          | KM12        | 2.53  | 3.75  | 19.23 | 50.64  | 12.87 | 7.86  | 38.54 | 75.70  | 13.32 |
|          | SW-620      | --    | --    | 25.85 | 13.74  | --    | --    | 65.74 | 88.83  | --    |
| CNS      | SF-268      | 7.89  | 0.48  | 16.42 | 27.64  | 9.39  | --    | 42.96 | 60.14  | 6.06  |
| Cancer   | SF-295      | --    | 0.39  | 12.41 | 55.45  | 11.32 | 3.27  | 50.25 | -41.68 | 18.07 |
|          | SF-539      | 0.31  | --    | --    | 28.57  | 1.95  | --    | 33.84 | -76.24 | 0.98  |
|          | SNB-19      | --    | --    | 11.93 | 23.87  | 4.39  | --    | 48.12 | 67.38  | 1.88  |
|          | SNB-75      | 11.09 | 12.43 | 9.95  | 49.76  | 14.48 | 7.72  | 33.11 | 95.59  | 13.35 |
|          | U251        | --    | --    | 25.94 | 47.98  | 8.97  | 1.68  | 51.30 | 85.35  | 6.83  |
| Melanoma | LOX IMVI    | 3.26  | 9.55  | 22.08 | 49.71  | 6.91  | --    | 52.55 | -81.64 | 12.63 |
|          | MALME-3M    | 6.75  | 5.34  | --    | 44.04  | 1.20  | 4.63  | 23.30 | -74.50 | --    |
|          | M14         | --    | 6.74  | --    | 49.98  | 3.94  | 7.88  | 25.18 | -62.81 | --    |
|          | MDA-MB-435  | --    | --    | --    | 60.60  | --    | --    | 28.79 | 83.04  | --    |
|          | SK-MEL-2    | --    | --    | 5.34  | NT     | 6.16  | NT    | 11.94 | NT     | 10.51 |
|          | SK-MEL-28   | --    | --    | --    | 23.26  | --    | --    | 27.18 | -38.21 | --    |
|          | SK-MEL-5    | --    | --    | 19.41 | -27.80 | 36.14 | --    | 41.73 | -96.57 | 37.98 |
|          | UACC-257    | --    | --    | 38.09 | 55.43  | --    | --    | --    | -14.97 | 5.54  |
|          | UACC-62     | 11.21 | 7.70  | 29.90 | 56.02  | 30.72 | 7.19  | 40.38 | 77.99  | 25.56 |
| Ovarian  | IGROV1      | 10.75 | 11.58 | 14.21 | 32.91  | 8.28  | --    | 49.80 | 71.62  | 3.80  |
| Cancer   | OVCAR-3     | --    | --    | 1.67  | 37.57  | 3.33  | --    | 27.84 | 55.22  | 11.09 |
|          | OVCAR-4     | 1.33  | --    | 7.55  | 67.68  | 28.49 | 2.36  | 45.32 | 67.05  | 14.04 |
|          | OVCAR-5     | 4.90  | --    | --    | 24.67  | --    | 1.74  | 38.57 | 63.60  | --    |
|          | OVCAR-8     | 0.40  | --    | 38.43 | 50.50  | 10.35 | 10.08 | 54.20 | 74.08  | 16.77 |
|          | NCI/ADR-RES | --    | 0.57  | 16.94 | 60.37  | 10.84 | 7.54  | 58.13 | 78.15  | 10.94 |

|          |                 |       |       |       |       |       |       |       |        |       |
|----------|-----------------|-------|-------|-------|-------|-------|-------|-------|--------|-------|
|          | SK-OV-3         | --    | --    | 4.00  | 25.59 | --    | 7.69  | 11.90 | 78.81  | --    |
| Renal    | 786-0           | 0.33  | --    | 12.94 | 41.20 | 5.74  | --    | 69.97 | -46.10 | 4.59  |
| Cancer   | A498            | --    | --    | 22.15 | 23.10 | --    | --    | 41.38 | -11.58 | --    |
|          | ACHN            | --    | 1.50  | 5.29  | 44.66 | 9.66  | --    | 72.71 | 89.96  | 5.27  |
|          | CAKI-1          | NT    | NT    | 36.73 | 47.85 | 29.41 | 6.27  | 45.99 | 80.28  | 22.49 |
|          | RXF 393         | --    | --    | 5.26  | --    | --    | --    | 34.74 | -11.35 | --    |
|          | SN12C           | --    | --    | 18.07 | 38.55 | 10.17 | --    | 59.49 | 76.17  | 6.24  |
|          | TK-10           | --    | --    | 6.54  | 30.14 | --    | --    | 22.67 | 67.89  | --    |
|          | UO-31           | 21.04 | 25.37 | 43.11 | 65.55 | 37.72 | 17.88 | 69.74 | -23.74 | 37.88 |
| Prostate | PC-3            | 17.63 | 17.42 | 42.77 | 77.16 | 34.66 | 5.66  | 58.13 | 94.79  | 14.97 |
| Cancer   | DU-145          | --    | --    | 10.35 | 27.43 | 6.17  | --    | 42.37 | 71.56  | --    |
| Breast   | MCF7            | 8.89  | 6.45  | 25.45 | 62.37 | 23.38 | 3.29  | 53.51 | -7.00  | 2.17  |
| Cancer   | MDA-MB-231/ATCC | 2.53  | --    | 24.16 | 42.94 | 22.90 | --    | 31.86 | 88.24  | 28.85 |
|          | HS 578T         | --    | --    | 12.96 | NT    | 2.02  | NT    | 21.36 | NT     | 5.27  |
|          | BT-549          | --    | --    | 21.34 | 83.04 | 12.45 | 0.56  | 19.89 | 95.43  | 4.82  |
|          | T-47D           | 17.72 | 18.92 | 28.65 | 88.83 | 33.06 | 18.13 | 46.25 | -9.17  | 32.03 |
|          | MDA-MB-468      | --    | --    | 14.16 | 65.41 | 3.90  | --    | 33.30 | -6.34  | 21.10 |

**Table S2.** Percent growth inhibition of compounds **17-23** and **25-26** at one dose concentration level ( $10^{-5}$  M)

| Cell Panel | Cell Line | 17    | 18    | 19    | 20    | 21    | 22    | 23     | 25    | 26    |
|------------|-----------|-------|-------|-------|-------|-------|-------|--------|-------|-------|
| Leukemia   | CCRF-CEM  | 4.95  | 0.16  | 7.54  | 14.97 | 17.00 | 25.61 | 84.59  | 39.35 | 20.26 |
|            | HL-60(TB) | 2.08  | 2.72  | --    | 3.82  | 24.00 | 16.39 | 85.19  | 53.60 | 70.50 |
|            | K-562     | NT    | NT    | NT    | NT    | NT    | 26.95 | 93.24  | 56.10 | 46.18 |
|            | MOLT-4    | 10.81 | 8.05  | 7.97  | 25.94 | 18.93 | 30.74 | -18.71 | 88.92 | 48.79 |
|            | RPMI-8226 | 3.37  | 16.33 | 26.70 | 32.02 | 24.37 | 38.69 | 92.49  | 59.15 | 45.09 |
|            | SR        | 0.35  | --    | --    | 20.80 | 19.01 | 28.69 | 96.41  | 54.67 | 20.35 |
| Non-Small  | A549/ATCC | 0.79  | --    | 0.79  | 3.03  | --    | 12.18 | 96.66  | 60.79 | 40.00 |
| Cell Lung  | EXVX      | 12.28 | 3.35  | 25.74 | 29.75 | 23.59 | 20.80 | 70.20  | 29.70 | 34.19 |
| Cancer     | HOP-62    | 13.18 | 8.80  | 18.24 | 12.10 | 18.05 | 2.81  | 76.57  | 37.54 | 29.29 |
|            | HOP-92    | 11.28 | 28.53 | 33.20 | 47.45 | 23.98 | 49.90 | NT     | NT    | NT    |

|          |             |       |       |       |       |       |       |       |       |       |
|----------|-------------|-------|-------|-------|-------|-------|-------|-------|-------|-------|
|          | NCI-H226    | 10.57 | --    | 11.23 | 19.94 | 15.86 | 35.19 | 74.94 | 16.59 | 9.16  |
|          | NCI-H23     | 4.89  | --    | 15.72 | 18.36 | 13.65 | 32.79 | 69.52 | 22.11 | 15.06 |
|          | NCI-H322M   | 10.07 | 0.05  | 0.04  | --    | 8.31  | 26.40 | 74.71 | 11.88 | 9.47  |
|          | NCI-H460    | --    | --    | 2.54  | 4.16  | 5.19  | 19.27 | 98.60 | 59.47 | 11.87 |
|          | NCI-H522    | 16.09 | 20.04 | 16.67 | 11.80 | 21.82 | 30.99 | 95.35 | 35.20 | 48.90 |
| Colon    | COLO 205    | --    | --    | --    | 6.10  | 10.20 | 13.91 | 91.31 | 33.74 | 13.58 |
| Cancer   | HCC-2998    | --    | 2.74  | 5.93  | 9.09  | 7.02  | 6.60  | 60.24 | 10.99 | 2.02  |
|          | HCT-116     | 8.12  | 20.52 | 25.22 | 29.74 | 15.57 | 28.27 | 91.40 | 50.80 | 28.27 |
|          | HCT-15      | --    | 5.32  | 7.48  | 22.38 | 40.46 | 24.24 | 87.51 | 32.20 | 21.70 |
|          | HT29        | 2.49  | 16.40 | 21.18 | 29.13 | 16.01 | 40.51 | 92.55 | 39.29 | 26.71 |
|          | KM12        | 6.65  | --    | 8.80  | 16.84 | 16.22 | 24.64 | 75.15 | 29.92 | 19.54 |
|          | SW-620      | 2.01  | --    | --    | --    | --    | 14.38 | 78.58 | 39.61 | 12.41 |
| CNS      | SF-268      | 6.67  | 5.51  | 0.97  | 7.67  | 5.91  | 10.90 | 64.20 | 32.93 | 14.82 |
| Cancer   | SF-295      | --    | --    | 9.46  | 5.39  | 9.55  | 28.87 | 76.86 | 15.42 | 10.26 |
|          | SF-539      | --    | 5.38  | --    | 13.73 | 4.28  | 10.32 | 68.11 | 17.63 | 2.35  |
|          | SNB-19      | --    | 0.62  | --    | 6.20  | 5.35  | 8.67  | 76.65 | 30.38 | 11.24 |
|          | SNB-75      | 15.74 | 12.54 | 20.27 | 23.56 | 24.80 | 40.66 | 59.87 | 32.80 | 23.21 |
|          | U251        | --    | --    | 11.97 | 17.60 | 23.07 | 11.26 | 87.37 | 33.09 | 30.89 |
| Melanoma | LOX IMVI    | 7.66  | 0.57  | 5.17  | 11.88 | 15.16 | 17.80 | 86.23 | 26.02 | 10.30 |
|          | MALME-3M    | 1.08  | --    | 5.46  | 13.45 | 7.00  | 20.24 | 69.23 | 5.57  | --    |
|          | M14         | --    | 8.52  | 6.35  | 0.14  | 6.15  | 19.80 | 69.77 | 11.67 | 7.08  |
|          | MDA-MB-435  | --    | --    | --    | --    | --    | 1.57  | 60.14 | 14.93 | 8.51  |
|          | SK-MEL-2    | 8.37  | 4.67  | 4.33  | --    | 18.61 | NT    | NT    | --    | 23.47 |
|          | SK-MEL-28   | --    | --    | --    | --    | 3.36  | 6.11  | 52.80 | 1.91  | 6.80  |
|          | SK-MEL-5    | 3.30  | 10.70 | 14.08 | 27.26 | 25.42 | 44.59 | 78.60 | 43.79 | 22.19 |
|          | UACC-257    | --    | --    | --    | 0.03  | --    | 17.42 | 76.93 | 49.57 | 43.09 |
|          | UACC-62     | 10.55 | 8.33  | 22.08 | 20.64 | 26.99 | 39.73 | 75.39 | 39.94 | 42.30 |
| Ovarian  | IGROV1      | 9.35  | --    | 4.77  | --    | 7.70  | 45.49 | 79.57 | 21.19 | 8.52  |
| Cancer   | OVCAR-3     | --    | --    | 6.44  | 13.25 | 10.25 | 20.70 | 62.40 | 15.26 | 16.18 |
|          | OVCAR-4     | --    | 9.68  | 22.68 | 27.73 | 20.93 | 46.72 | 69.18 | 33.78 | 24.16 |
|          | OVCAR-5     | --    | --    | --    | 1.84  | --    | 29.11 | 64.20 | 10.42 | 5.45  |
|          | OVCAR-8     | 5.02  | 0.25  | 7.74  | 8.27  | 2.04  | 14.56 | 85.33 | 43.00 | 26.69 |
|          | NCI/ADR-RES | 0.96  | --    | 3.58  | 8.26  | 8.69  | 14.23 | 79.91 | 32.51 | 12.43 |



|          |                 |       |       |       |       |       |       |       |       |       |
|----------|-----------------|-------|-------|-------|-------|-------|-------|-------|-------|-------|
|          | SK-OV-3         | --    | --    | --    | --    | 5.01  | --    | 76.95 | 17.48 | 11.79 |
| Renal    | 786-0           | 0.23  | 4.92  | 7.31  | 12.09 | 7.03  | 4.72  | 80.95 | 26.75 | 8.67  |
| Cancer   | A498            | --    | 0.98  | --    | --    | --    | --    | 95.31 | 36.51 | 9.45  |
|          | ACHN            | 0.04  | 1.52  | 12.26 | 3.26  | 15.33 | 24.82 | 86.22 | 48.22 | 11.18 |
|          | CAKI-1          | 22.50 | 8.36  | 32.50 | 20.67 | 27.23 | 28.99 | 74.97 | 46.36 | 38.54 |
|          | RXF 393         | --    | --    | --    | 0.92  | --    | --    | 73.74 | 19.02 | 0.83  |
|          | SN12C           | 3.47  | 3.11  | 5.55  | 11.12 | 16.29 | 24.28 | 80.73 | 36.84 | 18.41 |
|          | TK-10           | --    | --    | --    | 4.81  | 0.38  | 0.34  | 73.27 | 19.03 | 4.27  |
|          | UO-31           | 35.03 | 25.88 | 37.47 | 48.32 | 43.79 | 48.52 | 97.58 | 62.22 | 40.14 |
| Prostate | PC-3            | 9.46  | 3.52  | 25.57 | 30.73 | 28.79 | 41.58 | 77.91 | 50.70 | 47.92 |
| Cancer   | DU-145          | --    | --    | 1.05  | 2.42  | --    | 7.85  | 73.01 | 10.96 | 2.12  |
| Breast   | MCF7            | 1.69  | 10.51 | 3.49  | 24.10 | 31.03 | 60.66 | 87.91 | 23.87 | 22.20 |
| Cancer   | MDA-MB-231/ATCC | 14.52 | 9.39  | 7.73  | 21.89 | 26.04 | 44.24 | 66.43 | 27.06 | 36.94 |
|          | HS 578T         | 8.01  | --    | 5.70  | 6.06  | 7.08  | NT    | 59.18 | 15.26 | 13.41 |
|          | BT-549          | --    | 15.15 | 12.58 | 13.81 | 4.18  | 24.15 | 43.49 | 22.61 | 11.11 |
|          | T-47D           | 18.55 | 11.03 | 33.98 | 36.81 | 27.38 | 62.90 | 72.21 | 41.44 | 35.45 |
|          | MDA-MB-468      | 7.66  | --    | 12.11 | 10.22 | 7.98  | 55.14 | 95.67 | 15.89 | 8.68  |

**Table S3** Overview of the preliminary anticancer assay at single dose concentration of  $10^{-5}$  M

| <b>Compd</b> | <b>Mean growth percent</b> | <b>Range of growth inhibition</b> | <b>The most sensitive cell lines</b> | <b>Positive cytostatic effect</b> | <b>Positive cytotoxic effect</b> | <b>No. of sensitive cell lines</b> |
|--------------|----------------------------|-----------------------------------|--------------------------------------|-----------------------------------|----------------------------------|------------------------------------|
| <b>11</b>    | 49.68                      | -27.80 to 94.60                   | SK-MEL-5<br>(Melanoma)               | 26/58                             | 1/58                             | 27/58                              |
| <b>14</b>    | 46.00                      | 50.25 to 83.74                    | MOLT-4 (Leukemia)                    | 23/59                             | 0/59                             | 23/59                              |
| <b>15</b>    | 78.83                      | -96.57 to 99.26                   | SK-MEL-5<br>(Melanoma)               | 33/58                             | 25/58                            | 58/58                              |
| <b>23</b>    | 77.95                      | -18.71 to 98.60                   | MOLT-4 (Leukemia)                    | 57/58                             | 1/58                             | 58/58                              |
| <b>25</b>    | 32.52                      | 50.70 to 88.92                    | MOLT-4 (Leukemia)                    | 9/59                              | 0/59                             | 9/59                               |

**National Cancer Institute Developmental Therapeutics Program  
In-Vitro Testing Results**

| NSC : D - 800757 / 1              |       | Experiment ID : 1710NS90              |       |       |       |       | Test Type : 08 |      | Units : Molar |      |      |      |         |         |           |      |
|-----------------------------------|-------|---------------------------------------|-------|-------|-------|-------|----------------|------|---------------|------|------|------|---------|---------|-----------|------|
| Report Date : July 25, 2018       |       | Test Date : October 30, 2017          |       |       |       |       | QNS :          |      | MC :          |      |      |      |         |         |           |      |
| COMI : IS-80-F-5                  |       | Stain Reagent : SRB Dual-Pass Related |       |       |       |       | SSPL : 0YFW    |      |               |      |      |      |         |         |           |      |
| Panel/Cell Line                   | Time  | Log10 Concentration                   |       |       |       |       |                |      |               |      |      |      | GI50    | TGI     | LC50      |      |
|                                   |       | Zero                                  | Ctrl  | -8.0  | -7.0  | -6.0  | -5.0           | -4.0 | -8.0          | -7.0 | -6.0 | -5.0 |         |         |           | -4.0 |
| <b>Leukemia</b>                   |       |                                       |       |       |       |       |                |      |               |      |      |      |         |         |           |      |
| CCRF-CEM                          | 0.310 | 1.595                                 | 1.577 | 1.597 | 1.070 | 0.319 | 0.278          | 99   | 100           | 59   | 1    | -10  | 1.43E-6 | 1.16E-5 | > 1.00E-4 |      |
| HL-60(TB)                         | 0.899 | 3.046                                 | 2.788 | 2.914 | 2.805 | 0.495 | 0.565          | 88   | 94            | 89   | -45  | -37  | 1.95E-6 | 4.61E-6 | > 1.00E-4 |      |
| K-562                             | 0.161 | 1.601                                 | 1.427 | 1.358 | 0.655 | 0.124 | 0.119          | 88   | 83            | 34   | -23  | -26  | 4.76E-7 | 3.97E-6 | > 1.00E-4 |      |
| MOLT-4                            | 0.590 | 1.965                                 | 2.038 | 2.007 | 1.330 | 0.368 | 0.337          | 105  | 103           | 54   | -38  | -43  | 1.10E-6 | 3.88E-6 | > 1.00E-4 |      |
| RPMI-8226                         | 0.796 | 2.819                                 | 2.889 | 2.812 | 1.950 | 0.421 | 0.670          | 103  | 100           | 57   | -47  | -16  | 1.17E-6 | 3.53E-6 | > 1.00E-4 |      |
| SR                                | 0.364 | 1.423                                 | 1.343 | 1.407 | 0.576 | 0.206 | 0.293          | 92   | 98            | 20   | -44  | -20  | 4.14E-7 | 2.06E-6 | > 1.00E-4 |      |
| <b>Non-Small Cell Lung Cancer</b> |       |                                       |       |       |       |       |                |      |               |      |      |      |         |         |           |      |
| A549/ATCC                         | 0.416 | 1.635                                 | 1.759 | 1.952 | 1.795 | 0.109 | 0.219          | 110  | 126           | 113  | -74  | -47  | 2.18E-6 | 4.03E-6 | .         |      |
| EKVX                              | 0.826 | 2.879                                 | 2.627 | 2.908 | 2.173 | 0.288 | 0.409          | 88   | 101           | 66   | -65  | -51  | 1.32E-6 | 3.18E-6 | 7.66E-6   |      |
| HOP-62                            | 0.524 | 1.627                                 | 1.527 | 1.670 | 1.361 | 0.101 | 0.218          | 91   | 104           | 76   | -81  | -58  | 1.46E-6 | 3.05E-6 | 6.36E-6   |      |
| HOP-92                            | 1.249 | 1.787                                 | 1.688 | 1.704 | 1.378 | 0.171 | 0.460          | 82   | 85            | 24   | -86  | -63  | 3.72E-7 | 1.65E-6 | 4.69E-6   |      |
| NCI-H226                          | 0.825 | 2.276                                 | 2.177 | 2.250 | 1.939 | 0.198 | 0.662          | 93   | 98            | 77   | -76  | -20  | 1.50E-6 | 3.18E-6 | .         |      |
| NCI-H23                           | 0.716 | 2.086                                 | 2.085 | 2.085 | 1.508 | 0.166 | 0.379          | 100  | 100           | 58   | -77  | -47  | 1.14E-6 | 2.69E-6 | .         |      |
| NCI-H322M                         | 0.742 | 1.858                                 | 1.778 | 1.757 | 1.659 | 0.522 | 0.137          | 93   | 91            | 82   | -30  | -82  | 1.94E-6 | 5.42E-6 | 2.46E-5   |      |
| NCI-H460                          | 0.226 | 2.580                                 | 2.729 | 2.842 | 2.162 | 0.048 | 0.136          | 106  | 111           | 82   | -79  | -40  | 1.58E-6 | 3.24E-6 | .         |      |
| NCI-H522                          | 0.823 | 1.695                                 | 1.650 | 1.676 | 1.738 | 0.277 | 0.636          | 95   | 98            | 105  | -66  | -23  | 2.09E-6 | 4.10E-6 | .         |      |
| <b>Colon Cancer</b>               |       |                                       |       |       |       |       |                |      |               |      |      |      |         |         |           |      |
| COLO 205                          | 0.439 | 1.791                                 | 1.721 | 1.746 | 1.353 | 0.107 | 0.242          | 95   | 97            | 68   | -76  | -45  | 1.33E-6 | 2.96E-6 | .         |      |
| HCC-2998                          | 0.714 | 2.080                                 | 1.917 | 1.998 | 1.980 | 0.064 | 0.375          | 88   | 94            | 93   | -91  | -47  | 1.71E-6 | 3.19E-6 | .         |      |
| HCT-116                           | 0.235 | 1.935                                 | 1.833 | 1.671 | 0.701 | 0.014 | 0.410          | 94   | 84            | 27   | -94  | 10   | 4.02E-7 | .       | .         |      |
| HCT-15                            | 0.324 | 2.609                                 | 2.532 | 2.539 | 1.747 | 0.139 | 0.218          | 97   | 97            | 62   | -57  | -33  | 1.27E-6 | 3.32E-6 | .         |      |
| HT29                              | 0.230 | 1.288                                 | 1.247 | 1.252 | 0.583 | 0.096 | 0.189          | 96   | 97            | 33   | -58  | -18  | 5.46E-7 | 2.31E-6 | .         |      |
| KM12                              | 0.428 | 2.494                                 | 2.534 | 2.472 | 2.043 | 0.101 | 0.133          | 102  | 99            | 78   | -77  | -69  | 1.52E-6 | 3.20E-6 | 6.74E-6   |      |
| SW-620                            | 0.206 | 1.788                                 | 1.895 | 1.912 | 1.410 | 0.075 | 0.117          | 107  | 108           | 76   | -64  | -43  | 1.54E-6 | 3.50E-6 | .         |      |
| <b>CNS Cancer</b>                 |       |                                       |       |       |       |       |                |      |               |      |      |      |         |         |           |      |
| SF-268                            | 0.484 | 1.759                                 | 1.778 | 1.803 | 1.485 | 0.119 | 0.256          | 101  | 103           | 78   | -75  | -47  | 1.53E-6 | 3.24E-6 | .         |      |
| SF-295                            | 0.724 | 2.674                                 | 2.417 | 2.577 | 1.896 | 0.148 | 0.306          | 87   | 95            | 60   | -80  | -58  | 1.18E-6 | 2.69E-6 | 6.14E-6   |      |
| SF-539                            | 0.810 | 2.585                                 | 2.531 | 2.664 | 2.098 | 0.062 | 0.243          | 97   | 104           | 73   | -92  | -70  | 1.37E-6 | 2.75E-6 | 5.54E-6   |      |
| SNB-19                            | 0.572 | 1.872                                 | 1.880 | 1.880 | 1.608 | 0.161 | 0.296          | 101  | 101           | 80   | -72  | -48  | 1.57E-6 | 3.36E-6 | .         |      |
| SNB-75                            | 0.937 | 1.680                                 | 1.493 | 1.575 | 1.329 | 0.130 | 0.015          | 75   | 86            | 53   | -86  | -98  | 1.05E-6 | 2.40E-6 | 5.49E-6   |      |
| U251                              | 0.402 | 1.804                                 | 1.824 | 1.890 | 1.479 | 0.051 | 0.319          | 101  | 106           | 77   | -87  | -21  | 1.46E-6 | 2.94E-6 | .         |      |
| <b>Melanoma</b>                   |       |                                       |       |       |       |       |                |      |               |      |      |      |         |         |           |      |
| LOX IMVI                          | 0.618 | 2.989                                 | 3.030 | 2.986 | 2.549 | 0.029 | 0.383          | 102  | 100           | 81   | -95  | -38  | 1.51E-6 | 2.89E-6 | .         |      |
| MALME-3M                          | 0.578 | 1.546                                 | 1.545 | 1.498 | 1.279 | 0.066 | 0.255          | 100  | 95            | 72   | -89  | -56  | 1.38E-6 | 2.81E-6 | 5.75E-6   |      |
| M14                               | 0.440 | 1.773                                 | 1.683 | 1.739 | 1.529 | 0.062 | 0.323          | 93   | 97            | 82   | -86  | -27  | 1.55E-6 | 3.07E-6 | .         |      |
| MDA-MB-435                        | 0.486 | 2.497                                 | 2.391 | 2.493 | 2.295 | 0.064 | 0.066          | 95   | 100           | 90   | -87  | -87  | 1.68E-6 | 3.23E-6 | 6.18E-6   |      |
| SK-MEL-2                          | 1.237 | 2.229                                 | 2.283 | 2.250 | 2.393 | 0.260 | 0.728          | 105  | 102           | 117  | -79  | -41  | 2.19E-6 | 3.94E-6 | .         |      |
| SK-MEL-28                         | 0.684 | 2.009                                 | 1.957 | 1.995 | 1.854 | 0.059 | 0.245          | 96   | 99            | 88   | -91  | -64  | 1.63E-6 | 3.10E-6 | 5.88E-6   |      |
| SK-MEL-5                          | 0.838 | 3.189                                 | 3.202 | 3.286 | 2.496 | 0.011 | 0.261          | 101  | 104           | 71   | -99  | -69  | 1.32E-6 | 2.61E-6 | 5.15E-6   |      |
| UACC-257                          | 1.089 | 2.014                                 | 2.146 | 2.236 | 2.272 | 0.052 | 0.416          | 114  | 124           | 128  | -95  | -62  | 2.23E-6 | 3.74E-6 | 6.27E-6   |      |
| UACC-62                           | 0.888 | 2.786                                 | 2.849 | 2.893 | 2.477 | 0.090 | 0.220          | 103  | 106           | 84   | -90  | -75  | 1.56E-6 | 3.03E-6 | 5.89E-6   |      |
| <b>Ovarian Cancer</b>             |       |                                       |       |       |       |       |                |      |               |      |      |      |         |         |           |      |
| IGROV1                            | 0.501 | 1.962                                 | 1.997 | 1.963 | 1.669 | 0.199 | 0.391          | 102  | 100           | 80   | -60  | -22  | 1.64E-6 | 3.72E-6 | .         |      |
| OVCAR-3                           | 0.397 | 1.329                                 | 1.374 | 1.333 | 1.209 | 0.127 | 0.044          | 105  | 100           | 87   | -68  | -89  | 1.73E-6 | 3.64E-6 | 7.64E-6   |      |
| OVCAR-4                           | 0.725 | 1.613                                 | 1.543 | 1.553 | 1.190 | 0.529 | 0.173          | 92   | 93            | 52   | -27  | -76  | 1.07E-6 | 4.56E-6 | 2.93E-5   |      |
| OVCAR-5                           | 0.595 | 1.813                                 | 1.674 | 1.876 | 1.590 | 0.280 | 0.280          | 89   | 105           | 82   | -53  | -53  | 1.72E-6 | 4.04E-6 | 9.50E-6   |      |
| OVCAR-8                           | 0.441 | 1.812                                 | 1.924 | 2.006 | 1.521 | 0.266 | 0.305          | 108  | 114           | 79   | -40  | -31  | 1.75E-6 | 4.62E-6 | > 1.00E-4 |      |
| NCI/ADR-RES                       | 0.496 | 1.751                                 | 1.716 | 1.777 | 1.339 | 0.300 | 0.399          | 97   | 102           | 67   | -40  | -20  | 1.45E-6 | 4.25E-6 | > 1.00E-4 |      |
| SK-OV-3                           | 0.828 | 1.776                                 | 1.716 | 1.824 | 1.727 | 0.350 | 0.010          | 94   | 105           | 95   | -58  | -99  | 1.97E-6 | 4.18E-6 | 8.89E-6   |      |
| <b>Renal Cancer</b>               |       |                                       |       |       |       |       |                |      |               |      |      |      |         |         |           |      |
| 786-0                             | 0.613 | 2.242                                 | 2.026 | 2.138 | 1.542 | 0.044 | 0.721          | 87   | 94            | 57   | -93  | 7    | 1.11E-6 | .       | .         |      |
| A498                              | 1.109 | 2.133                                 | 2.165 | 2.174 | 2.003 | 0.170 | 0.272          | 103  | 104           | 87   | -85  | -76  | 1.65E-6 | 3.22E-6 | 6.28E-6   |      |
| ACHN                              | 0.370 | 1.635                                 | 1.729 | 1.703 | 1.104 | 0.130 | 0.164          | 107  | 105           | 58   | -65  | -56  | 1.16E-6 | 2.96E-6 | 7.57E-6   |      |
| CAKI-1                            | 0.452 | 1.740                                 | 1.658 | 1.702 | 1.394 | 0.334 | 0.026          | 94   | 97            | 73   | -26  | -94  | 1.71E-6 | 5.45E-6 | 2.23E-5   |      |
| RXF 393                           | 0.688 | 1.459                                 | 1.474 | 1.584 | 1.225 | 0.039 | 0.395          | 102  | 116           | 70   | -94  | -43  | 1.32E-6 | 2.66E-6 | .         |      |
| SN12C                             | 0.563 | 2.187                                 | 2.059 | 2.134 | 1.619 | 0.104 | 0.261          | 92   | 97            | 65   | -82  | -54  | 1.27E-6 | 2.78E-6 | 6.09E-6   |      |
| TK-10                             | 0.713 | 2.135                                 | 2.099 | 2.155 | 1.865 | 0.391 | 0.264          | 97   | 101           | 81   | -45  | -63  | 1.76E-6 | 4.39E-6 | 1.87E-5   |      |
| UO-31                             | 0.625 | 1.757                                 | 1.631 | 1.582 | 1.071 | 0.184 | 0.166          | 89   | 85            | 39   | -71  | -73  | 5.83E-7 | 2.28E-6 | 6.50E-6   |      |
| <b>Prostate Cancer</b>            |       |                                       |       |       |       |       |                |      |               |      |      |      |         |         |           |      |
| PC-3                              | 0.493 | 1.248                                 | 1.232 | 1.247 | 1.051 | 0.313 | 0.460          | 98   | 100           | 74   | -37  | -7   | 1.64E-6 | 4.66E-6 | > 1.00E-4 |      |
| DU-145                            | 0.276 | 1.428                                 | 1.367 | 1.401 | 1.232 | 0.051 | 0.014          | 95   | 98            | 83   | -82  | -95  | 1.59E-6 | 3.20E-6 | 6.43E-6   |      |
| <b>Breast Cancer</b>              |       |                                       |       |       |       |       |                |      |               |      |      |      |         |         |           |      |
| MCF7                              | 0.361 | 2.314                                 | 2.229 | 2.324 | 1.885 | 0.221 | 0.217          | 96   | 100           | 78   | -39  | -40  | 1.74E-6 | 4.66E-6 | > 1.00E-4 |      |
| MDA-MB-231/ATCC                   | 0.556 | 1.280                                 | 1.340 | 1.335 | 1.180 | 0.085 | 0.209          | 108  | 108           | 86   | -85  | -63  | 1.63E-6 | 3.19E-6 | 6.26E-6   |      |
| HS 578T                           | 1.026 | 2.187                                 | 2.236 | 2.240 | 1.974 | 0.548 | 1.028          | 104  | 105           | 82   | -47  | .    | 1.77E-6 | .       | > 1.00E-4 |      |
| BT-549                            | 1.014 | 2.072                                 | 1.943 | 2.020 | 1.526 | 0.148 | 0.403          | 88   | 95            | 48   | -85  | -60  | 9.22E-7 | 2.30E-6 | 5.43E-6   |      |
| T-47D                             | 0.666 | 1.488                                 | 1.390 | 1.481 | 1.232 | 0.547 | 0.556          | 88   | 99            | 69   | -18  | -17  | 1.65E-6 | 6.22E-6 | > 1.00E-4 |      |
| MDA-MB-468                        | 0.749 | 1.286                                 | 1.278 | 1.434 | 1.195 | 0.229 | 0.405          | 99   | 128           | 83   | -69  | -46  | 1.65E-6 | 3.51E-6 | .         |      |

**Figure S72.** *In vitro* anticancer activity of compound 15 at five dose concentration level ( $10^{-4}$  –  $10^{-8}$  M)

## National Cancer Institute Developmental Therapeutics Program In-Vitro Testing Results

| NSC : D - 799082 / 1              |       | Experiment ID : 1708NS48              |       |       |       |       | Test Type : 08 |      | Units : Molar |      |      |      |         |         |         |         |
|-----------------------------------|-------|---------------------------------------|-------|-------|-------|-------|----------------|------|---------------|------|------|------|---------|---------|---------|---------|
| Report Date : July 25, 2018       |       | Test Date : August 07, 2017           |       |       |       |       | QNS :          |      | MC :          |      |      |      |         |         |         |         |
| COMI : IS-50-F-4                  |       | Stain Reagent : SRB Dual-Pass Related |       |       |       |       | SSPL : 0Z9N    |      |               |      |      |      |         |         |         |         |
| Panel/Cell Line                   | Time  | Log10 Concentration                   |       |       |       |       |                |      |               |      |      |      | GI50    | TGI     | LC50    |         |
|                                   |       | Zero                                  | Ctrl  | -8.0  | -7.0  | -6.0  | -5.0           | -4.0 | -8.0          | -7.0 | -6.0 | -5.0 |         |         |         | -4.0    |
| <b>Leukemia</b>                   |       |                                       |       |       |       |       |                |      |               |      |      |      |         |         |         |         |
| CCR6-CEM                          | 0.553 | 2.704                                 | 2.676 | 2.795 | 2.108 | 0.487 | 0.466          | 99   | 104           | 72   | -12  | -16  | 1.84E-6 | 7.22E-6 | >       | 1.00E-4 |
| HL-60(TB)                         | 0.763 | 2.933                                 | 2.822 | 2.845 | 2.390 | 0.785 | 0.410          | 95   | 96            | 75   | 1    | -46  | 2.18E-6 | 1.05E-5 | >       | 1.00E-4 |
| K-562                             | 0.072 | 0.531                                 | 0.517 | 0.494 | 0.325 | 0.102 | 0.120          | 97   | 92            | 55   | 7    | 10   | 1.27E-6 | >       | 1.00E-4 |         |
| MOLT-4                            | 0.638 | 2.779                                 | 2.661 | 2.767 | 1.138 | 0.639 | 0.504          | 94   | 99            | 23   | .    | -21  | 4.46E-7 | 1.01E-5 | >       | 1.00E-4 |
| RPMI-8226                         | 0.485 | 1.511                                 | 1.532 | 1.517 | 1.007 | 0.418 | 0.384          | 102  | 101           | 51   | -14  | -21  | 1.03E-6 | 6.10E-6 | >       | 1.00E-4 |
| SR                                | 0.311 | 1.391                                 | 1.385 | 1.226 | 0.687 | 0.273 | 0.242          | 99   | 85            | 35   | -12  | -22  | 4.96E-7 | 5.47E-6 | >       | 1.00E-4 |
| <b>Non-Small Cell Lung Cancer</b> |       |                                       |       |       |       |       |                |      |               |      |      |      |         |         |         |         |
| A549/ATCC                         | 0.431 | 1.813                                 | 1.743 | 1.752 | 1.213 | 0.078 | 0.158          | 95   | 96            | 57   | -82  | -63  | 1.12E-6 | 2.56E-6 |         | 5.88E-6 |
| EKVX                              | 0.616 | 1.944                                 | 1.770 | 1.831 | 1.641 | 0.556 | 0.448          | 87   | 91            | 77   | -10  | -27  | 2.05E-6 | 7.72E-6 | >       | 1.00E-4 |
| HOP-62                            | 0.680 | 1.528                                 | 1.459 | 1.453 | 1.265 | 0.584 | 0.302          | 92   | 91            | 69   | -14  | -56  | 1.69E-6 | 6.75E-6 |         | 7.30E-5 |
| HOP-92                            | 0.950 | 1.492                                 | 1.455 | 1.502 | 1.344 | 0.788 | 0.375          | 93   | 102           | 73   | -17  | -61  | 1.79E-6 | 6.45E-6 |         | 5.72E-5 |
| NCI-H226                          | 0.744 | 1.369                                 | 1.344 | 1.348 | 1.273 | 0.667 | 0.306          | 96   | 97            | 85   | -10  | -59  | 2.32E-6 | 7.78E-6 |         | 6.55E-5 |
| NCI-H23                           | 0.504 | 1.713                                 | 1.635 | 1.607 | 1.282 | 0.271 | 0.185          | 94   | 91            | 64   | -46  | -63  | 1.35E-6 | 3.82E-6 |         | 1.66E-5 |
| NCI-H322M                         | 0.635 | 1.727                                 | 1.674 | 1.628 | 1.307 | 0.594 | 0.065          | 95   | 91            | 62   | -6   | -90  | 1.48E-6 | 8.04E-6 |         | 3.33E-5 |
| NCI-H460                          | 0.226 | 2.339                                 | 2.544 | 2.526 | 1.288 | 0.209 | 0.064          | 110  | 109           | 50   | -8   | -72  | 1.01E-6 | 7.41E-6 |         | 4.59E-5 |
| NCI-H522                          | 1.234 | 2.677                                 | 2.514 | 2.512 | 2.382 | 0.851 | 0.550          | 89   | 89            | 80   | -31  | -55  | 1.85E-6 | 5.24E-6 |         | 5.98E-5 |
| <b>Colon Cancer</b>               |       |                                       |       |       |       |       |                |      |               |      |      |      |         |         |         |         |
| COLO 205                          | 0.455 | 1.512                                 | 1.495 | 1.510 | 1.066 | 0.292 | 0.220          | 98   | 100           | 58   | -36  | -52  | 1.21E-6 | 4.14E-6 |         | 7.87E-5 |
| HCC-2998                          | 0.731 | 2.267                                 | 2.257 | 2.152 | 2.031 | 0.374 | 0.211          | 99   | 92            | 85   | -49  | -71  | 1.82E-6 | 4.30E-6 |         | 1.12E-5 |
| HCT-116                           | 0.216 | 1.921                                 | 1.805 | 1.875 | 0.585 | 0.247 | 0.111          | 93   | 97            | 22   | 2    | -49  | 4.22E-7 | 1.09E-5 | >       | 1.00E-4 |
| HCT-15                            | 0.338 | 2.489                                 | 2.288 | 2.403 | 1.566 | 0.367 | 0.157          | 91   | 96            | 57   | 1    | -54  | 1.34E-6 | 1.06E-5 |         | 8.57E-5 |
| HT29                              | 0.286 | 1.652                                 | 1.594 | 1.564 | 0.952 | 0.272 | 0.194          | 96   | 94            | 49   | -5   | -32  | 9.38E-7 | 8.11E-6 | >       | 1.00E-4 |
| KM12                              | 0.342 | 1.923                                 | 1.900 | 1.900 | 1.507 | 0.438 | 0.189          | 99   | 99            | 74   | 6    | -45  | 2.24E-6 | 1.32E-5 | >       | 1.00E-4 |
| SW-620                            | 0.243 | 1.912                                 | 1.947 | 1.933 | 1.099 | 0.280 | 0.126          | 102  | 101           | 51   | 2    | -48  | 1.06E-6 | 1.10E-5 | >       | 1.00E-4 |
| <b>CNS Cancer</b>                 |       |                                       |       |       |       |       |                |      |               |      |      |      |         |         |         |         |
| SF-268                            | 0.661 | 2.406                                 | 2.294 | 2.289 | 2.098 | 0.804 | 0.204          | 94   | 93            | 82   | 8    | -69  | 2.73E-6 | 1.28E-5 |         | 5.66E-5 |
| SF-295                            | 0.647 | 2.467                                 | 2.245 | 2.295 | 1.849 | 0.522 | 0.287          | 88   | 91            | 66   | -19  | -56  | 1.54E-6 | 5.93E-6 |         | 6.96E-5 |
| SF-539                            | 0.815 | 2.496                                 | 2.221 | 2.343 | 2.123 | 0.786 | 0.246          | 84   | 91            | 78   | -4   | -70  | 2.19E-6 | 9.03E-6 |         | 5.01E-5 |
| SNB-19                            | 0.490 | 1.845                                 | 1.817 | 1.867 | 1.365 | 0.646 | 0.361          | 98   | 102           | 65   | 12   | -26  | 1.88E-6 | 2.01E-5 | >       | 1.00E-4 |
| SNB-75                            | 1.089 | 2.056                                 | 1.802 | 1.844 | 1.724 | 1.119 | 0.169          | 74   | 78            | 66   | 3    | -85  | 1.78E-6 | 1.08E-5 |         | 4.04E-5 |
| U251                              | 0.245 | 1.151                                 | 1.184 | 1.179 | 0.876 | 0.283 | 0.085          | 104  | 103           | 70   | 4    | -65  | 2.00E-6 | 1.15E-5 |         | 6.02E-5 |
| <b>Melanoma</b>                   |       |                                       |       |       |       |       |                |      |               |      |      |      |         |         |         |         |
| LOX IMVI                          | 0.330 | 2.072                                 | 1.942 | 1.932 | 1.135 | 0.109 | 0.202          | 93   | 92            | 46   | -67  | -39  | 8.26E-7 | 2.56E-6 |         | .       |
| MALME-3M                          | 0.539 | 1.121                                 | 1.135 | 1.154 | 1.086 | 0.193 | 0.243          | 102  | 106           | 94   | -64  | -55  | 1.90E-6 | 3.93E-6 |         | 8.12E-6 |
| M14                               | 0.408 | 1.776                                 | 1.695 | 1.695 | 1.577 | 0.132 | 0.164          | 94   | 94            | 85   | -68  | -60  | 1.70E-6 | 3.61E-6 |         | 7.67E-6 |
| MDA-MB-435                        | 0.456 | 2.260                                 | 2.142 | 2.219 | 2.003 | 0.513 | 0.160          | 93   | 98            | 86   | 3    | -65  | 2.71E-6 | 1.11E-5 |         | 6.04E-5 |
| SK-MEL-2                          | 1.037 | 2.335                                 | 2.347 | 2.258 | 2.106 | 0.903 | 0.372          | 101  | 94            | 82   | -13  | -64  | 2.19E-6 | 7.32E-6 |         | 5.29E-5 |
| SK-MEL-28                         | 0.619 | 1.975                                 | 1.869 | 1.876 | 1.849 | 0.435 | 0.230          | 92   | 93            | 91   | -30  | -63  | 2.18E-6 | 5.66E-6 |         | 4.09E-5 |
| SK-MEL-5                          | 0.637 | 3.007                                 | 2.858 | 3.068 | 2.447 | 0.054 | 0.156          | 94   | 103           | 76   | -92  | -76  | 1.44E-6 | 2.85E-6 |         | 5.65E-6 |
| UACC-257                          | 1.022 | 1.873                                 | 1.834 | 1.888 | 1.956 | 0.931 | 0.448          | 95   | 102           | 110  | -9   | -56  | 3.19E-6 | 8.41E-6 |         | 7.39E-5 |
| UACC-62                           | 0.831 | 2.945                                 | 2.857 | 2.819 | 2.578 | 0.323 | 0.482          | 96   | 94            | 83   | -61  | -42  | 1.69E-6 | 3.76E-6 |         | .       |
| <b>Ovarian Cancer</b>             |       |                                       |       |       |       |       |                |      |               |      |      |      |         |         |         |         |
| IGROV1                            | 0.445 | 1.918                                 | 1.897 | 1.720 | 1.234 | 0.373 | 0.327          | 99   | 87            | 54   | -16  | -27  | 1.12E-6 | 5.86E-6 | >       | 1.00E-4 |
| OVCAR-3                           | 0.458 | 1.648                                 | 1.674 | 1.635 | 1.416 | 0.436 | 0.208          | 102  | 99            | 80   | -5   | -55  | 2.28E-6 | 8.78E-6 |         | 8.09E-5 |
| OVCAR-4                           | 0.694 | 1.351                                 | 1.269 | 1.332 | 1.150 | 0.756 | 0.505          | 87   | 97            | 69   | 9    | -27  | 2.11E-6 | 1.81E-5 | >       | 1.00E-4 |
| OVCAR-5                           | 0.614 | 1.438                                 | 1.325 | 1.370 | 1.303 | 0.722 | 0.430          | 86   | 92            | 84   | 13   | -30  | 2.99E-6 | 2.01E-5 | >       | 1.00E-4 |
| OVCAR-8                           | 0.427 | 1.745                                 | 1.739 | 1.718 | 1.145 | 0.425 | 0.294          | 99   | 98            | 54   | .    | -31  | 1.21E-6 | 9.76E-6 | >       | 1.00E-4 |
| NCI/ADR-RES                       | 0.460 | 1.610                                 | 1.612 | 1.534 | 1.068 | 0.507 | 0.330          | 100  | 93            | 53   | 4    | -28  | 1.14E-6 | 1.34E-5 | >       | 1.00E-4 |
| SK-OV-3                           | 0.849 | 1.465                                 | 1.429 | 1.478 | 1.401 | 0.798 | 0.286          | 94   | 102           | 90   | -6   | -66  | 2.59E-6 | 8.64E-6 |         | 5.36E-5 |
| <b>Renal Cancer</b>               |       |                                       |       |       |       |       |                |      |               |      |      |      |         |         |         |         |
| 786-0                             | 0.555 | 2.268                                 | 2.055 | 2.109 | 1.597 | 0.680 | 0.135          | 88   | 91            | 61   | 7    | -76  | 1.59E-6 | 1.22E-5 |         | 4.90E-5 |
| A498                              | 1.329 | 2.452                                 | 2.508 | 2.630 | 2.388 | 0.811 | 0.078          | 105  | 116           | 94   | -39  | -94  | 2.15E-6 | 5.10E-6 |         | 1.58E-5 |
| ACHN                              | 0.304 | 1.329                                 | 1.288 | 1.282 | 0.646 | 0.133 | 0.072          | 96   | 95            | 33   | -56  | -76  | 5.39E-7 | 2.36E-6 |         | 8.52E-6 |
| CAKI-1                            | 0.479 | 2.162                                 | 1.933 | 1.979 | 1.441 | 0.421 | 0.140          | 86   | 89            | 57   | -12  | -71  | 1.27E-6 | 6.67E-6 |         | 4.41E-5 |
| RXF 393                           | 0.738 | 1.378                                 | 1.366 | 1.360 | 1.181 | 0.164 | 0.207          | 98   | 97            | 69   | -78  | -72  | 1.35E-6 | 2.96E-6 |         | 6.47E-6 |
| SN12C                             | 0.402 | 1.705                                 | 1.725 | 1.705 | 1.062 | 0.481 | 0.131          | 102  | 100           | 51   | 6    | -67  | 1.03E-6 | 1.21E-5 |         | 5.79E-5 |
| TK-10                             | 0.732 | 1.481                                 | 1.401 | 1.371 | 1.260 | 0.796 | 0.177          | 89   | 85            | 71   | 8    | -76  | 2.14E-6 | 1.26E-5 |         | 4.94E-5 |
| UO-31                             | 0.666 | 1.986                                 | 1.807 | 1.740 | 1.373 | 0.084 | 0.151          | 86   | 81            | 54   | -87  | -77  | 1.06E-6 | 2.40E-6 |         | 5.42E-6 |
| <b>Prostate Cancer</b>            |       |                                       |       |       |       |       |                |      |               |      |      |      |         |         |         |         |
| PC-3                              | 0.410 | 1.621                                 | 1.557 | 1.588 | 1.250 | 0.320 | 0.301          | 95   | 97            | 69   | -22  | -27  | 1.63E-6 | 5.75E-6 | >       | 1.00E-4 |
| DU-145                            | 0.286 | 1.328                                 | 1.447 | 1.403 | 1.209 | 0.399 | 0.077          | 111  | 107           | 89   | 11   | -73  | 3.14E-6 | 1.35E-5 |         | 5.31E-5 |
| <b>Breast Cancer</b>              |       |                                       |       |       |       |       |                |      |               |      |      |      |         |         |         |         |
| MCF7                              | 0.313 | 1.840                                 | 1.700 | 1.701 | 1.252 | 0.351 | 0.149          | 91   | 91            | 61   | 2    | -53  | 1.56E-6 | 1.11E-5 |         | 8.99E-5 |
| MDA-MB-231/ATCC                   | 0.620 | 1.515                                 | 1.529 | 1.518 | 1.299 | 0.616 | 0.245          | 102  | 100           | 76   | .    | -60  | 2.18E-6 | 9.78E-6 |         | 6.68E-5 |
| HS 578T                           | 0.738 | 1.665                                 | 1.722 | 1.744 | 1.616 | 0.856 | 0.536          | 106  | 109           | 95   | 13   | -27  | 3.51E-6 | 2.08E-5 | >       | 1.00E-4 |
| BT-549                            | 1.784 | 2.955                                 | 2.914 | 2.986 | 2.898 | 2.011 | 0.482          | 96   | 103           | 95   | 19   | -73  | 3.95E-6 | 1.62E-5 |         | 5.64E-5 |
| T-47D                             | 0.877 | 1.821                                 | 1.676 | 1.785 | 1.719 | 0.980 | 0.715          | 85   | 96            | 89   | 11   | -19  | 3.16E-6 | 2.34E-5 | >       | 1.00E-4 |
| MDA-MB-468                        | 0.694 | 1.434                                 | 1.412 | 1.470 | 1.287 | 0.377 | 0.336          | 97   | 105           | 80   | -46  | -52  | 1.73E-6 | 4.33E-6 |         | 5.28E-5 |

**Figure S73.** *In vitro* anticancer activity of compound **23** at five dose concentration level ( $10^{-4}$  –  $10^{-8}$  M)

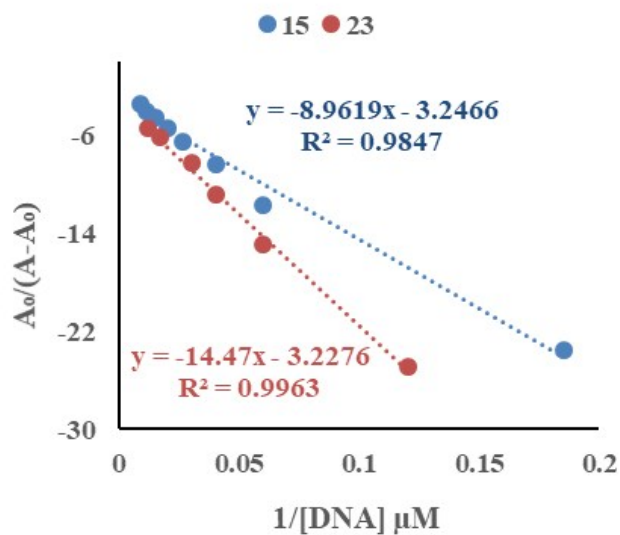

**Figure S74.** Benesi-Hildebrand plot of compounds **15** and **23**  $\{A_0/(A - A_0)$  vs.  $1/[DNA]\}$ .

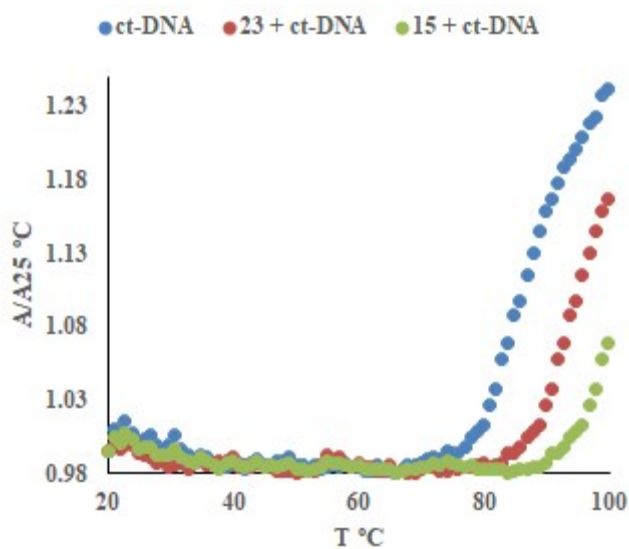

**Figure S75.** Thermal denaturation plots of ct-DNA in the absence and presence of compounds **15** and **23**.

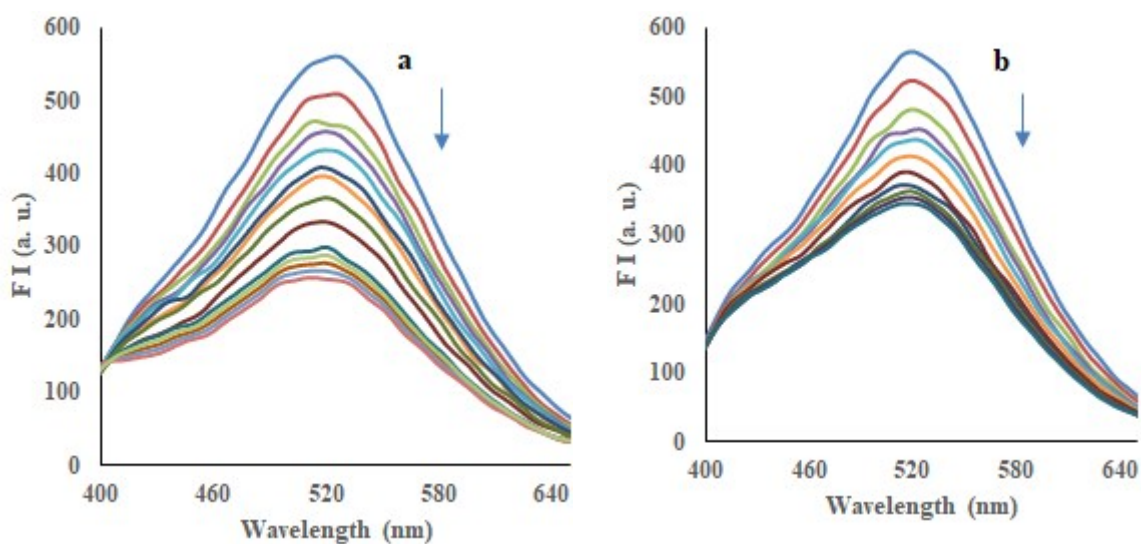

**Figure S76.** Emission spectra of compound **15** ( $5.0 \mu\text{M}$ ) at different temperatures (a) 308 K and (b) 318 K in the presence of ct-DNA (308 K:  $0\text{-}35 \mu\text{M}$  and 318 K:  $0\text{-}35 \mu\text{M}$ ) in phosphate buffer ( $\text{pH } 7.4$ )

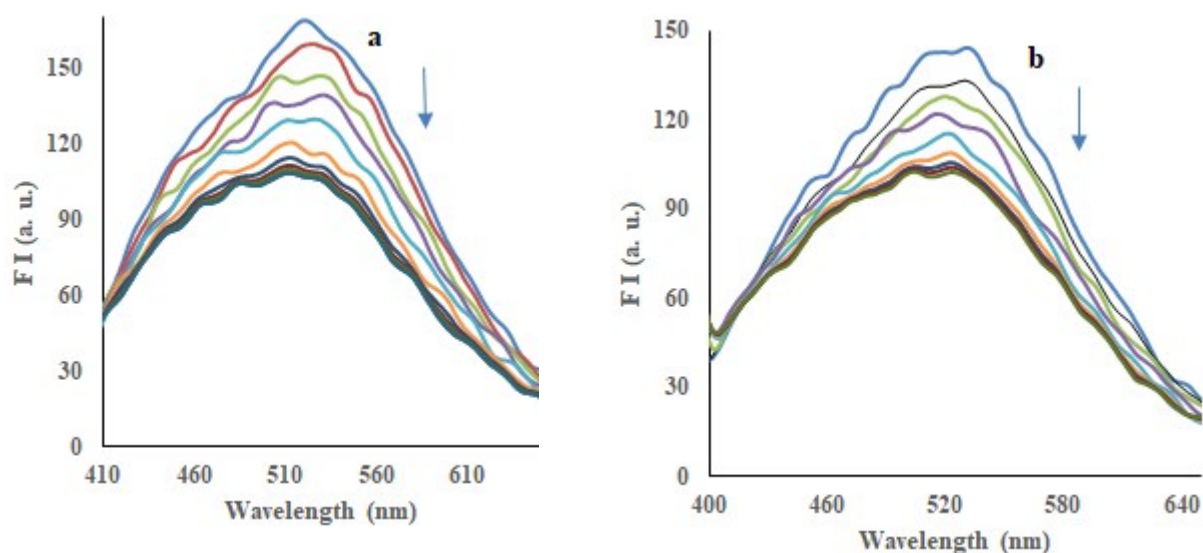

**Figure S77** Emission spectra of compound **23** ( $5.0 \mu\text{M}$ ) at different temperatures (a) 308 K and (b) 318 K in the presence of ct-DNA (308 K:  $0\text{-}25 \mu\text{M}$  and 318 K:  $0\text{-}30 \mu\text{M}$ ) in phosphate buffer ( $\text{pH } 7.4$ ).

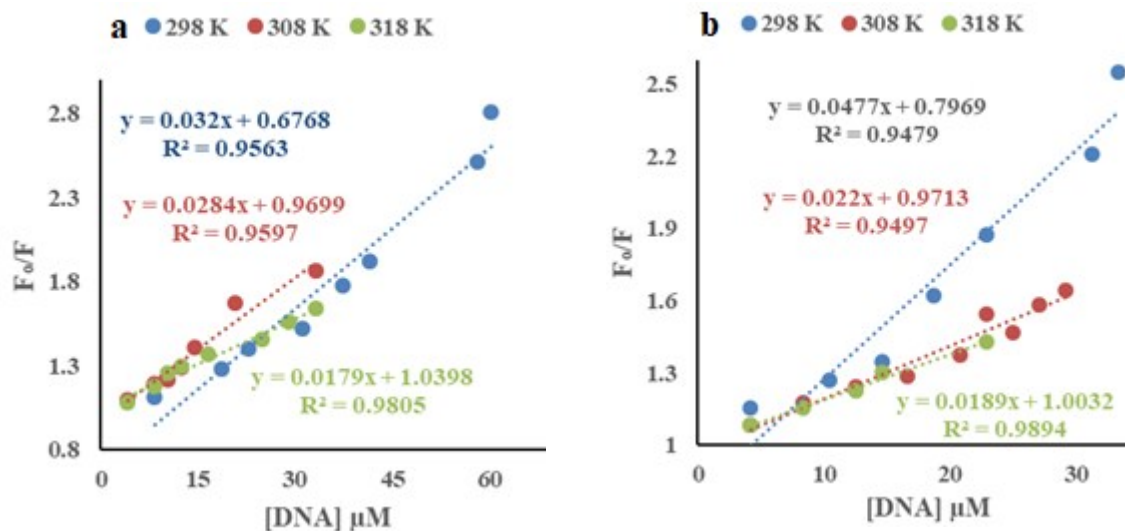

**Figure S78** Stern-Volmer plot of compounds (a) **15** and (b) **23** at different temperatures { $F_0/F$  vs. [DNA]}

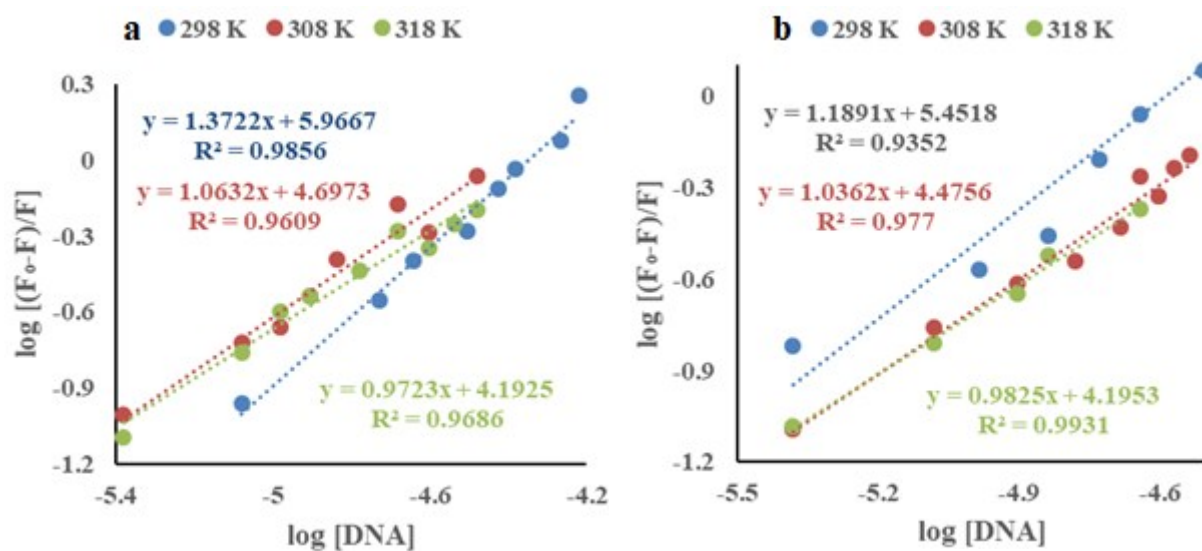

**Figure S79** Modified Stern-Volmer plot of compounds (a) **15** and (b) **23** at different temperatures { $\log[(F_0-F)/F]$  vs.  $\log[\text{DNA}]$ }

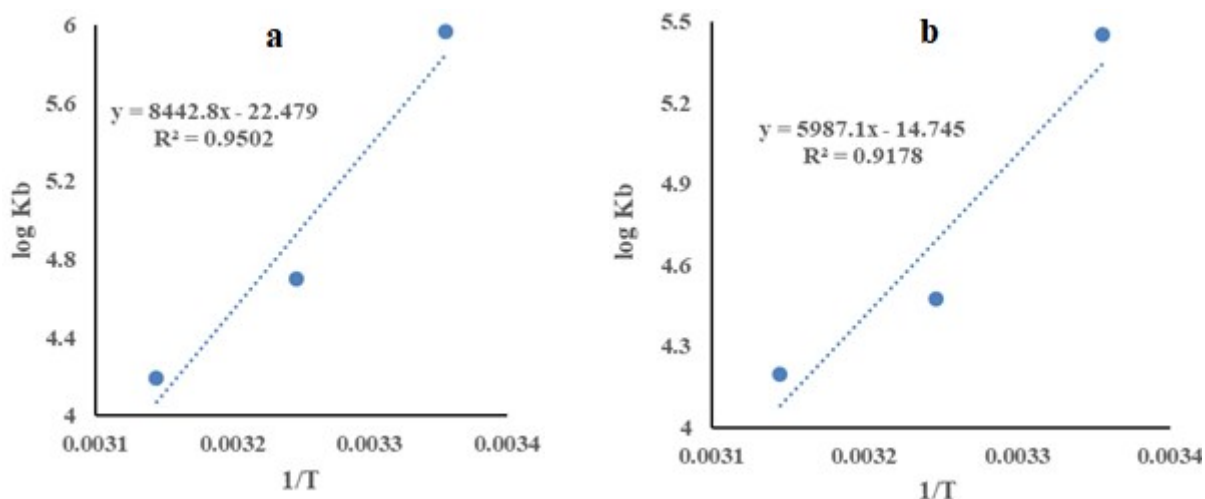

**Figure S80** Von't Hoff plot of compounds (a) **15** and (b) **23** at different temperatures { $\log K_b$  vs.  $1/T$ }

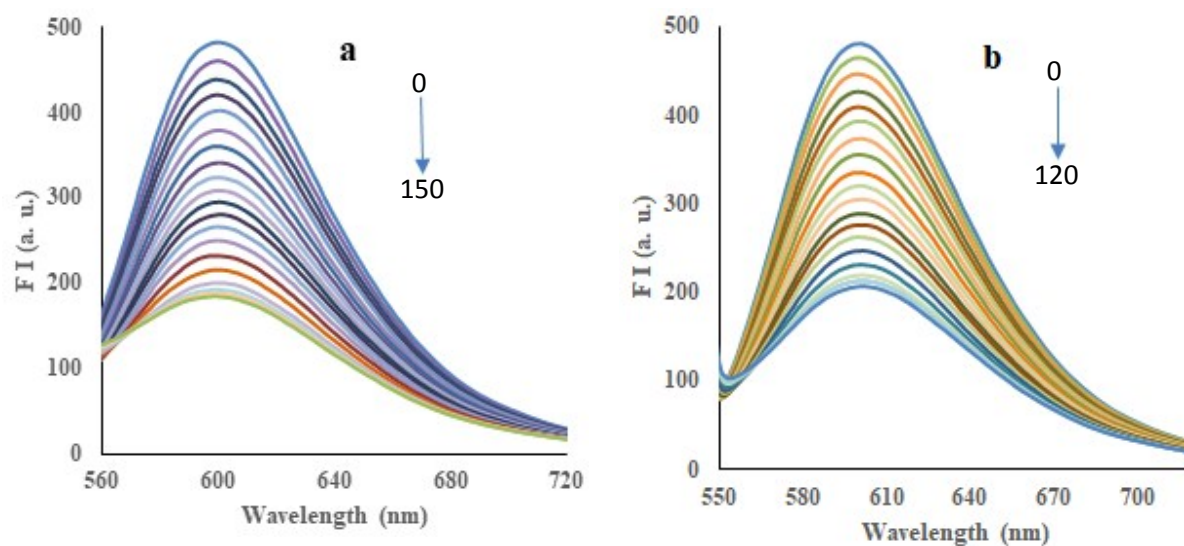

**Figure S81** Emission spectra of EB-DNA complex in the absence and presence of the compounds (a) **15** and (b) **23** in phosphate buffer at  $pH$  7.4.

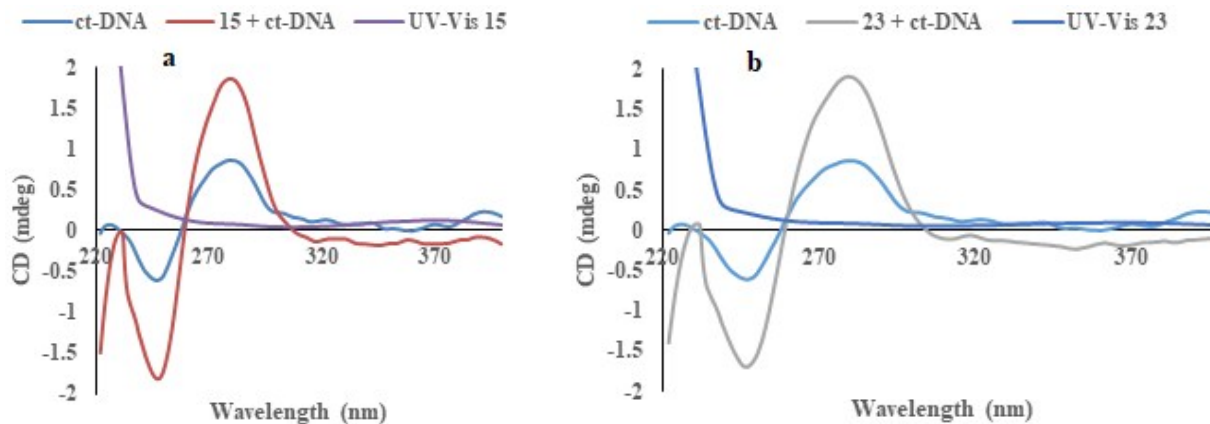

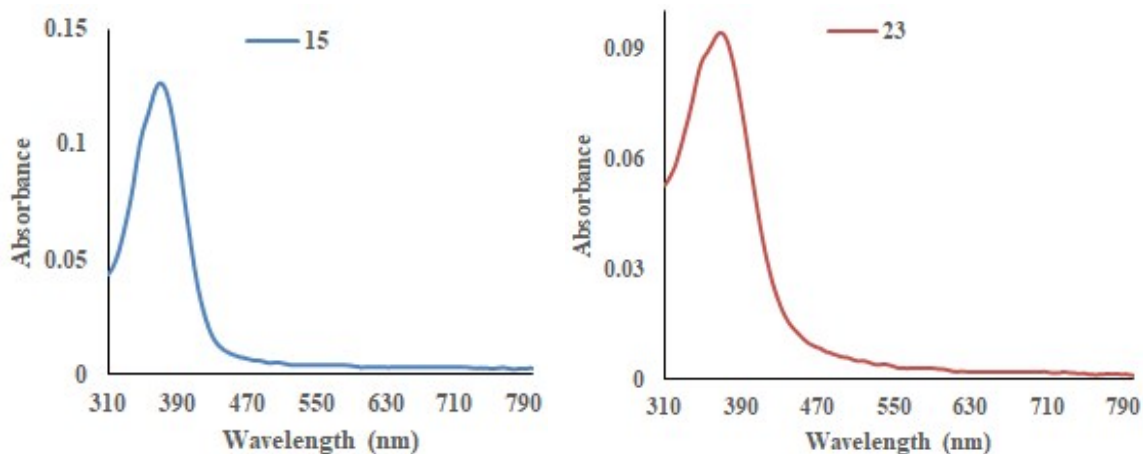

**Figure S82.** (a) CD spectra of free ct-DNA (blue line), **15**-DNA complex (red line) and UV-vis spectra of the compound **15** (violet line); (b) CD spectra of free ct-DNA (blue line), **15**-DNA complex (red line) and UV-vis spectra of the compound **15** (dark blue line); (c) UV-vis spectra of the compound **15**; (d) UV-vis spectra of the compound **23**

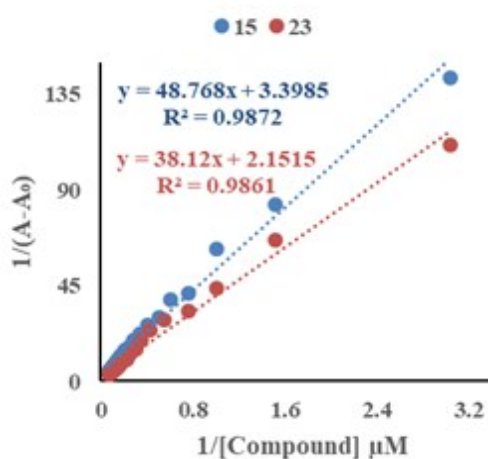

**Figure S83** Benesi-Hildebrand plot of compounds **15** and **23**  $\{1/(A - A_0)$  vs.  $1/[\text{compound}]$

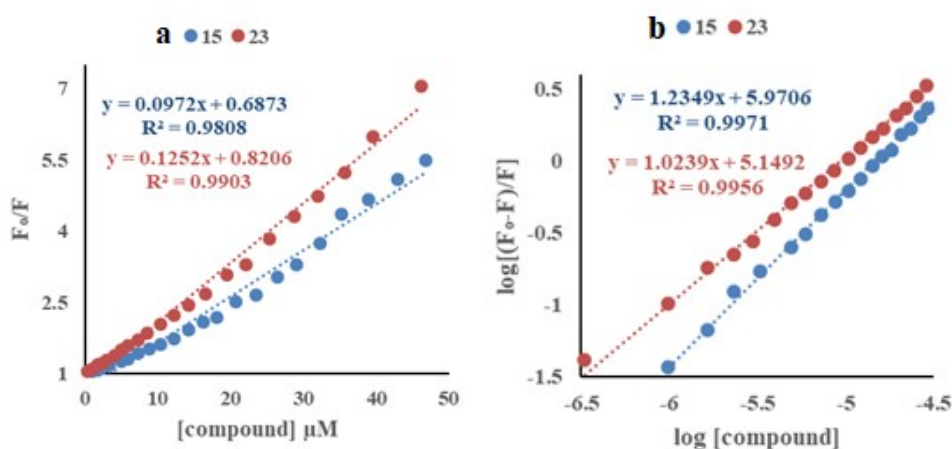

**Figure S84** (a) Stern-Volmer plot of compounds **15** and **23**  $\{F_0/F$  vs.  $[\text{compound}]$
